# Supplementary material for: 1,3-Dipolar cycloaddition reactions of triflatophosphanes to afford functionalized azaphospholium salts and azaphospholes
Source: Royal Society of Chemistry journal article supplement (doi:10.1039/d5qi00427f), 2025-01-01
Supplement: d5qi00427f1.pdf [file d5qi00427f1.pdf]

# 1,3-Dipolar Cycloaddition Reactions of Triflatophosphanes to Functionalized Azaphospholium salts and Azaphospholes

Jannis Fidelius,<sup>a</sup> Kai Schwedtmann,<sup>a</sup> Sebastian Schellhammer,<sup>b</sup> Rongjuan Huang,<sup>b</sup>  
Felix Hennersdorf,<sup>a</sup> Moritz Fink,<sup>a</sup> Jan Haberstroh,<sup>a</sup> Antonio Bauzá,<sup>c</sup>  
Antonio Frontera,<sup>c</sup> Sebastian Reineke,<sup>b</sup> Jan J. Weigand<sup>\*,a</sup>

<sup>a</sup>Faculty of Chemistry and Food Chemistry, Technische Universität Dresden, 01062 Dresden, Germany

[\*] E-mail: jan.weigand@tu-dresden.de

<sup>b</sup>Dresden Integrated Center for Applied Physics and Photonic Materials (IAPP), Technische Universität Dresden,  
01069 Dresden, Germany

<sup>c</sup>Department of Chemistry, Universitat de Illes Balears, 07122 Palma de Mallorca, Spain

## Supporting Information

# Table of contents

|                                                                                                          |          |
|----------------------------------------------------------------------------------------------------------|----------|
| <b>1. General remarks, materials and methods</b> .....                                                   | <b>4</b> |
| <b>2. Synthetic details and characterization data</b> .....                                              | <b>6</b> |
| 2.1. Scrambling reactions of $L_CPCl_2[OTf]$ and $L_CP(Pyrr)_2[OTf]$ .....                               | 6        |
| 2.2. Scrambling reactions of $23[OTf]$ and $22[OTf]$ in the presence of two equivalents of $AgOTf$ ..... | 8        |
| 2.3. Cycloaddition reactions of $6[OTf]$ with Nitriles and (Thio)-Cyanates.....                          | 11       |
| 2.3.1. Synthesis of $9a[OTf]_2$ .....                                                                    | 11       |
| 2.3.2. Synthesis of $9b[OTf]_2$ .....                                                                    | 14       |
| 2.3.3. Synthesis of $9c[OTf]_2$ .....                                                                    | 17       |
| 2.3.4. Synthesis of $9d[OTf]_2$ .....                                                                    | 19       |
| 2.3.5. Synthesis of $9e[OTf]_2$ .....                                                                    | 22       |
| 2.3.6. Synthesis of $9f[OTf]_4$ .....                                                                    | 25       |
| 2.3.7. Synthesis of $12[OTf]_2$ .....                                                                    | 28       |
| 2.3.8. Synthesis of $13[OTf]_2$ .....                                                                    | 31       |
| 2.4. Chemical Reductions towards Diazaphospholes.....                                                    | 33       |
| 2.4.1. Synthesis of <b>14</b> by reduction of $9a[OTf]_2$ .....                                          | 33       |
| 2.4.2. Synthesis of <b>16</b> by reduction of $9g[OTf]_2$ .....                                          | 35       |
| 2.4.3. Synthesis of <b>17</b> by reduction of $30[OTf]_2$ .....                                          | 37       |
| 2.5. Cycloaddition Reactions of $6[OTf]$ with other Dipolarophiles.....                                  | 39       |
| 2.5.1. Synthesis of $18a[OTf]_2$ .....                                                                   | 39       |
| 2.5.2. Synthesis of $18b[OTf]_2$ .....                                                                   | 42       |
| 2.5.3. Synthesis of $19[OTf]_2$ .....                                                                    | 44       |
| 2.5.4. Synthesis of $20[OTf]_2$ .....                                                                    | 47       |
| 2.6. Cycloaddition reactions of $24[OTf]$ with nitriles.....                                             | 50       |
| 2.6.1. Synthesis of $26a[OTf]_2$ .....                                                                   | 50       |
| 2.6.2. Synthesis of $26b[OTf]_2$ .....                                                                   | 53       |
| 2.6.3. Synthesis of $26c[OTf]_2$ .....                                                                   | 56       |
| 2.6.4. Synthesis of $26d[OTf]_2$ .....                                                                   | 59       |
| 2.6.5. Synthesis of $26e[OTf]_2$ .....                                                                   | 61       |
| 2.6.6. Synthesis of $26f[OTf]_4$ .....                                                                   | 64       |
| 2.7. Additional Cycloadditions of $24[OTf]$ .....                                                        | 67       |
| 2.7.1. Synthesis of $27[OTf]$ .....                                                                      | 67       |
| 2.7.2. Synthesis of $28[OTf]$ .....                                                                      | 70       |
| 2.8. Additional Experiments.....                                                                         | 73       |

|           |                                                                                                            |           |
|-----------|------------------------------------------------------------------------------------------------------------|-----------|
| 2.8.1.    | <i>Comparison of reducing agents</i> .....                                                                 | 73        |
| 2.8.2.    | <i>Scope of Dipolarophiles</i> .....                                                                       | 74        |
| 2.8.3.    | <i>Electrochemical Investigation of <b>9a</b>[OTf]<sub>2</sub></i> .....                                   | 75        |
| 2.8.4.    | <i>Side-Reaction in the synthesis of <b>18b</b>[OTf]<sub>2</sub></i> .....                                 | 76        |
| 2.8.5.    | <i>Slow Formation of <b>9a</b>[OTf]<sub>2</sub> from <b>20</b>[OTf]<sub>2</sub> in MeCN Solution</i> ..... | 77        |
| 2.8.6.    | <i>Attempted Cycloaddition of <b>24</b>[OTf] with Phenylacetylene</i> .....                                | 79        |
| <b>3.</b> | <b>Computational Investigations</b> .....                                                                  | <b>80</b> |
| 3.1.      | Theoretical Methods used for Mechanistic Studies .....                                                     | 80        |
| 3.1.1.    | <i>Cartesian Coordinates</i> .....                                                                         | 80        |
| 3.2.      | Theoretical Methods used for Electronic Structure Analysis .....                                           | 87        |
| <b>4.</b> | <b>Photophysical Characterization</b> .....                                                                | <b>88</b> |
| <b>5.</b> | <b>X-ray Diffraction Refinements</b> .....                                                                 | <b>89</b> |
| 5.1.      | General remarks .....                                                                                      | 89        |
| 5.2.      | Crystallographic data .....                                                                                | 90        |
| <b>6.</b> | <b>References</b> .....                                                                                    | <b>94</b> |

## 1. General remarks, materials and methods

**Manipulations** were performed in a Glovebox MB Unilab or using Schlenk techniques under an atmosphere of purified nitrogen or argon, respectively. All glassware was oven-dried at 160 °C prior to use.

Dry, oxygen-free **solvents** (CH<sub>2</sub>Cl<sub>2</sub>, C<sub>6</sub>H<sub>5</sub>F, *o*-C<sub>6</sub>H<sub>4</sub>F<sub>2</sub>, EtOAc, CHCl<sub>3</sub>, NEt<sub>3</sub>, CH<sub>3</sub>CN, MeNO<sub>2</sub>, C<sub>2</sub>H<sub>4</sub>Cl<sub>2</sub> (distilled from CaH<sub>2</sub>), *n*-hexane, *n*-pentane, THF, Et<sub>2</sub>O, Toluene, Benzene (distilled from potassium)) were employed. All distilled and deuterated solvents were stored over 4 Å molecular sieves (except CD<sub>3</sub>CN and CH<sub>3</sub>CN). Compounds **11**[OTf]<sup>1</sup>, **30**[OTf]<sup>1</sup>, **22**[OTf]<sup>2</sup> and **23**[OTf]<sup>3</sup> were synthesized according to literature procedures. Additional reagents were obtained from commercial sources and used as received.

**NMR spectra** were measured on a Bruker *AVANCE III HD Nanobay 400 MHz UltraSield* (<sup>1</sup>H (400.13 MHz), <sup>13</sup>C (100.61 MHz), <sup>31</sup>P (161.98 MHz) <sup>195</sup>Pt (86.01 MHz)) or on a Bruker *AVANCE III HDX, 500 MHz Ascend* (<sup>1</sup>H (500.13 MHz), <sup>13</sup>C (125.75 MHz), <sup>31</sup>P (202.45 MHz)). All <sup>13</sup>C NMR spectra were exclusively recorded with composite pulse decoupling. Reported numbers assigning atoms in the <sup>13</sup>C spectra were indirectly deduced from the cross-peaks in 2D correlation experiments (HMBC, HSQC). Chemical shifts were referenced to δ<sub>TMS</sub> = 0.00 ppm (<sup>1</sup>H, <sup>13</sup>C), δ<sub>H<sub>3</sub>PO<sub>4</sub>(85%)</sub> = 0.00 ppm (<sup>31</sup>P) and δ<sub>K<sub>2</sub>PtCl<sub>6</sub></sub> = 0.00 ppm (<sup>195</sup>Pt). Chemical shifts (δ) are reported in ppm. Coupling constants (*J*) are reported in Hz.

**Simultaneous thermal analysis (STA)** was conducted with a *STA 8000* apparatus (Perkin Elmer) under helium gas flow (20 mL/min) and a heating rate of 20 K/min. The “decomposition” temperature was obtained from 5 % weight loss and is disclosed as **T<sub>95</sub>**.

**Melting points** were recorded on an electrothermal melting point apparatus (Büchi Switzerland, Melting point M-560) in sealed capillaries under Argon atmosphere or were deduced from STA measurements and are uncorrected.

**Infrared (IR)** and **Raman** spectra were recorded at ambient temperature using a *Bruker Vertex 70* instrument equipped with a RAM II module (Nd-YAG laser, 1064 nm). The Raman intensities are reported in percent relative to the most intense peak and are given in parenthesis. An ATR unit (diamond) was used for recording IR spectra. The intensities are reported relative to the most intense peak and are given in parenthesis using the following abbreviations: vw = very weak, w = weak, m = medium, s = strong, vs = very strong.

**Elemental analyses** were performed on a *Vario MICRO cube* Elemental Analyzer by Elementar Analysatorsysteme GmbH in CHNS mode.

**Sample preparation for optical spectroscopy** was conducted with a host matrix PMMA and the respective compound. Both were dissolved in chloroform with a doping concentration of 5 wt%. Films were prepared via spin-coating by dropping 180 µL blended solutions onto 1-inch quartz substrates with a spin speed of 1200 rpm and spin time of 60 s, and then annealed at 80 °C for 2 min. Solutions were prepared in chloroform at a concentration of 10<sup>-4</sup> mol/L.

**Optical spectroscopy.** Absorption spectra were collected using a UV-vis-NIR 3600 double beam spectrophotometer (Shimadzu). Steady-state and delayed spectra were recorded using a 275 nm

M275L4 LED, 340 nm M340L4 LED or a 365 nm M365L2 LED (Thorlabs), a Spectrometer CAS 140CT-151 (Instrument Systems) and a TGP3122 pulse generator (AIM-TTI Instruments), the latter was acquired shortly after the trigger pulse and LED light off in nitrogen atmosphere. Photoluminescence quantum yields (PLQYs) were recorded using a setup consisting of a 340 nm LED (M340L4) as the excitation source, a calibrated integrating sphere (Labsphere RTC-060-SF), and an array spectrometer (CAS140CT, Instrument Systems). The PLQY values were determined based on the method proposed by de Mello<sup>4</sup> et al. and improved by F. Fries<sup>5</sup> et al. For fluorescence QYs, samples were measured in ambient atmosphere. Nitrogen atmosphere was purged to remove oxygen for the measurement of delayed spectra and phosphorescence PLQYs.

**Electrochemical (EC) measurements** such as cyclic voltammetry (CV), square wave voltammetry (SWV) and chronoamperometry (CA) were performed in a Glovebox Pure Lab HE GP-1 SR (Innovative Technology, USA) in an atmosphere of purified nitrogen (< 0.1 ppm O<sub>2</sub>; < 0.1 ppm H<sub>2</sub>O). The glovebox was equipped with military grade BNC feedthroughs in a custom-made gas tight flange for low noise electrical connection of the electrochemical cells inside. EC cells were connected to a PGSTAT302 (Metrohm Autolab, Utrecht, The Netherlands)  $E = \pm 10$  V,  $U = \pm 35$  V. NOVA Software (Metrohm Autolab) Version 1.11.2 was used to control the potentiostat and magnetic stirring. Data analysis of the electrochemical data was performed using OriginPro 2019 (OriginLab Cooperation, Northampton, MA, USA).

EC measurements were performed in 10 mL electrochemical cells using platinum disk electrodes (1,6 mm diameter, ALS Co. Ltd., Japan) as working electrodes. The electrodes were polished with 1  $\mu$ m Diamond polishing paste and then 0.05  $\mu$ m polishing alumina on separate polishing pads prior to use. A Pt wire coil (200 mm length, 0.5 mm width) was used as counter electrode without separation. A reference electrode consisting of a silver wire in a solution of 0.01 M AgNO<sub>3</sub> in 0.1 M [Bu<sub>4</sub>N][OTf] supporting electrolyte solution in CH<sub>2</sub>Cl<sub>2</sub> and separated from the substrate solution by a Vycor Frit was used. Ferrocene was used to reference the potentials obtained in CV and SWV experiments to a potential of  $E_{1/2} = 0$  V according to IUPAC convention.

[*n*-Bu<sub>4</sub>N][OTf] was pre-dried at least 5 times by dissolving in CH<sub>2</sub>Cl<sub>2</sub> and evaporating the solvent to high vacuum at 80 °C. Final drying and removal of HOTf traces was achieved by dissolving in dry benzene and refluxing this solution in a Soxhlet apparatus for 5 days with vacuum activated molecular sieves in the extraction thimble renewed every day. Prior to each measurement the electrolyte stock solution is passed through a Pasteur pipette with an activated (1·10<sup>-3</sup> mbar, 350 °C, 24 h) aluminum oxide bed (D = 5 mm; L = 70 mm) in the glove box before the substrate is added.

## 2. Synthetic details and characterization data

### 2.1. Scrambling reactions of $L_cPCl_2[OTf]$ and $L_cP(Pyrr)_2[OTf]$

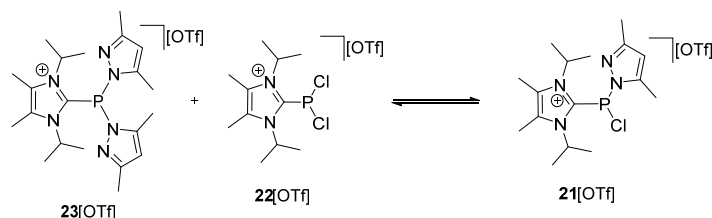

**Scheme S 1:** Scrambling reaction between **23[OTf]** and **22[OTf]** to **21[OTf]**.

**23[OTf]** (15.4 mg, 0.028 mmol, 1.0 equiv.), **22[OTf]** (12 mg, 0.028 mmol, 1.0 equiv.) are dissolved in 0.3 mL of  $CH_2Cl_2$  and stirred at room temperature. In the time between preparing the sample and measuring the  $^{31}P$  NMR spectrum an equilibrium between the three species **23[OTf]**, **22[OTf]** and **21[OTf]** has established, that did not change even after three days of consecutive stirring.

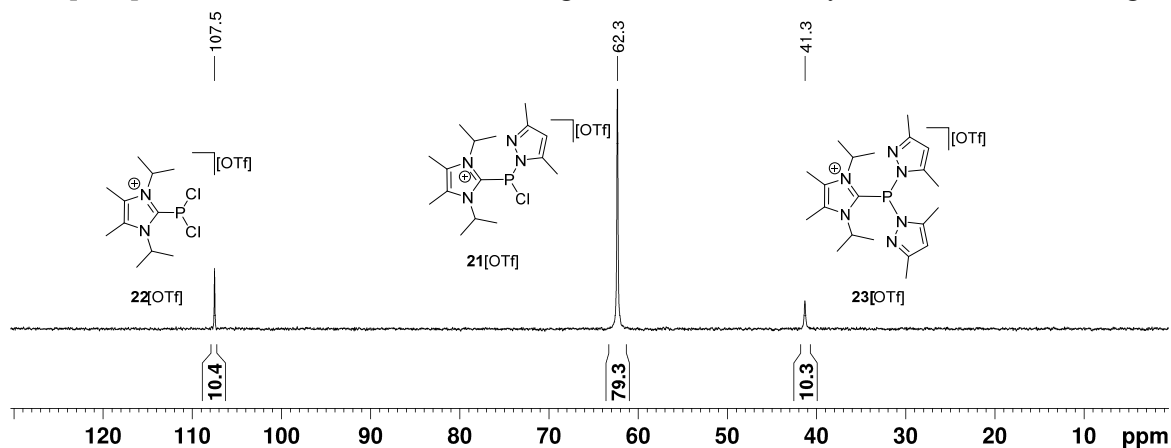

**Figure S 1:**  $^{31}P$  NMR spectrum of the reaction of **22[OTf]** and **23[OTf]** in  $CH_2Cl_2$  after stirring for 3 days. (300 K,  $C_6D_6$  ref.)

Mechanistically, we assume that first a nucleophilic attack of the pyrazole N atom in **23<sup>+</sup>** at the P atom of **22<sup>+</sup>**, leading to the formation of a chloride anion. In a subsequent second nucleophilic attack the free chloride anion attacks at the central P atom and **21<sup>+</sup>** is formed, respectively.

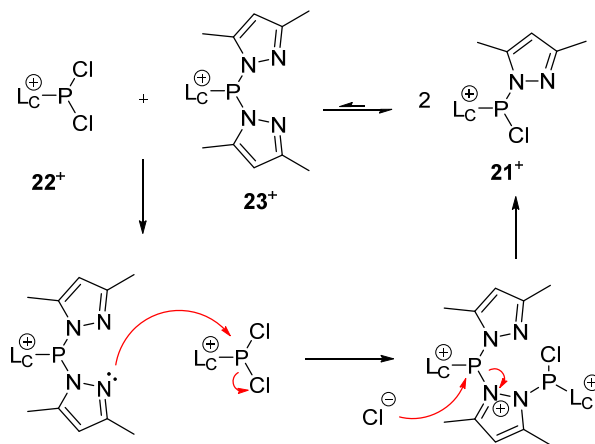

**Scheme S 2:** Proposed Mechanism of the scrambling of **22<sup>+</sup>** and **23<sup>+</sup>** to **21<sup>+</sup>**.

## 2.2. Scrambling reactions of 23[OTf] and 22[OTf] in the presence of two equivalents of AgOTf

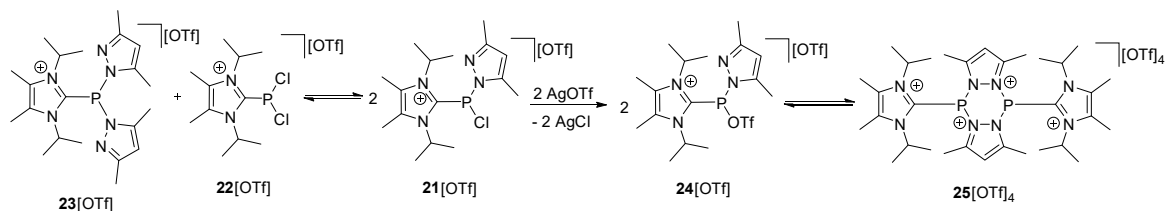

**Scheme S 3:** Reaction of *in situ* formed 21[OTf] with AgOTf to 24[OTf] and 25[OTf]<sub>4</sub>.

22[OTf] (30 mg, 0.07 mmol, 1.0 equiv.), 23[OTf] (38.9 mg, 0.07 mmol, 1.0 equiv.) and AgOTf (39.4 mg, 0.153 mmol, 2.2 equiv.) are suspended in 2 mL of CH<sub>2</sub>Cl<sub>2</sub> and stirred at room temperature for 4 h. The resulting suspension is filtered and the filtrate used for NMR-studies. For high temperature NMR-studies the solvent was removed and the residue dissolved in *o*-C<sub>6</sub>H<sub>4</sub>Cl<sub>2</sub>. The obtained <sup>31</sup>P{ }-NMR spectrum shows two sharp peaks ( $\delta = 86.4$  ppm,  $\delta = 34.7$  ppm; for *o*-C<sub>6</sub>H<sub>4</sub>Cl<sub>2</sub>:  $\delta = 78.3$  ppm,  $\delta = 26.9$  ppm; **Figure S 2**) which are attributed to an equilibrium, resulting from the dimerization of 24[OTf] by coordination of the pyrazole N atom to the electrophilic P atom. This equilibrium can be slightly shifted by heating the sample. At higher temperature (350 K) the integral of the resonance with a chemical shift of 26.9 ppm decreases. This behaviour can be reversed by cooling the sample again.

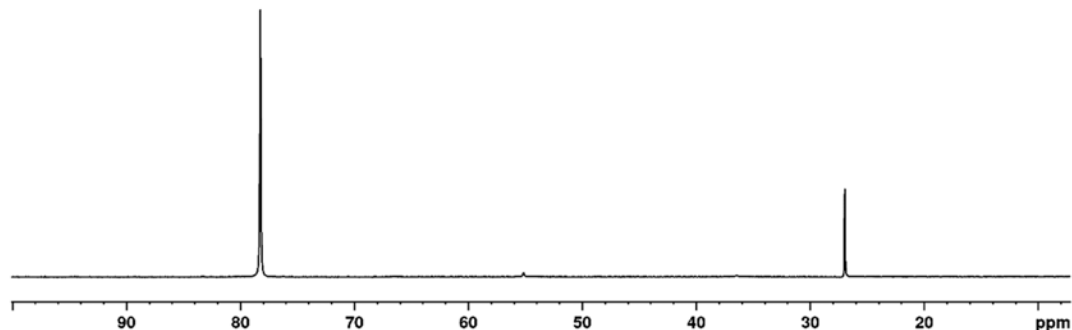

**Figure S 2:** <sup>31</sup>P{ }-NMR spectrum of a mixture of 22[OTf], 23[OTf] and two equivalents of AgOTf in *o*-C<sub>6</sub>H<sub>4</sub>Cl<sub>2</sub> after stirring for 4 h. (300 K, C<sub>6</sub>D<sub>6</sub> reference)



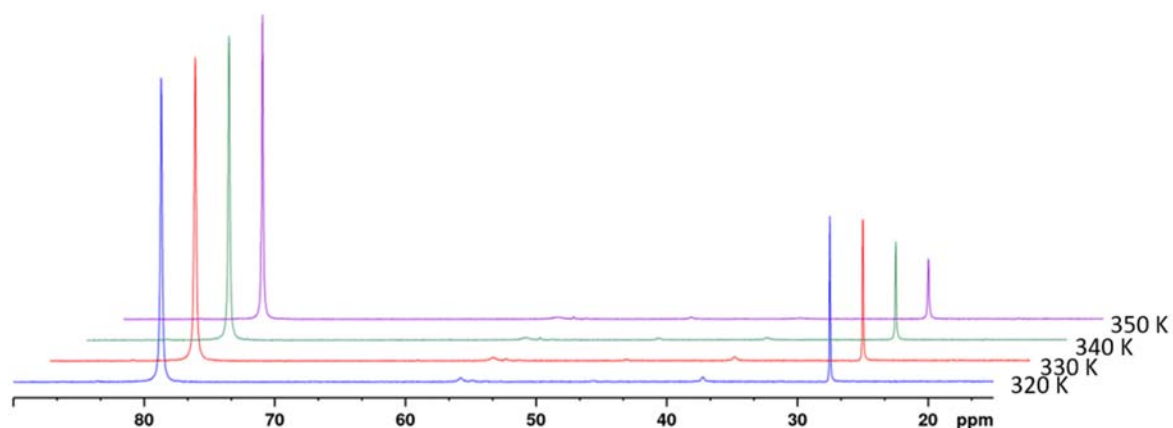

**Figure S 3:** Variable temperature  $^{31}\text{P}\{-}$ -NMR spectra of a mixture of **22**[OTf], **23**[OTf] and two equivalents of AgOTf in *o*- $\text{C}_6\text{H}_4\text{Cl}_2$  after stirring for 4 h. (300 K,  $\text{C}_6\text{D}_6$  reference)

To further underline this interpretation we investigated the reaction mixture in  $^{31}\text{P}\{-}^{31}\text{P}\{-}$ -EXSY (Exchange Spectroscopy) NMR-experiments which revealed a chemical exchange between both resonances of **24**[OTf] and **25**[OTf]<sub>4</sub>.

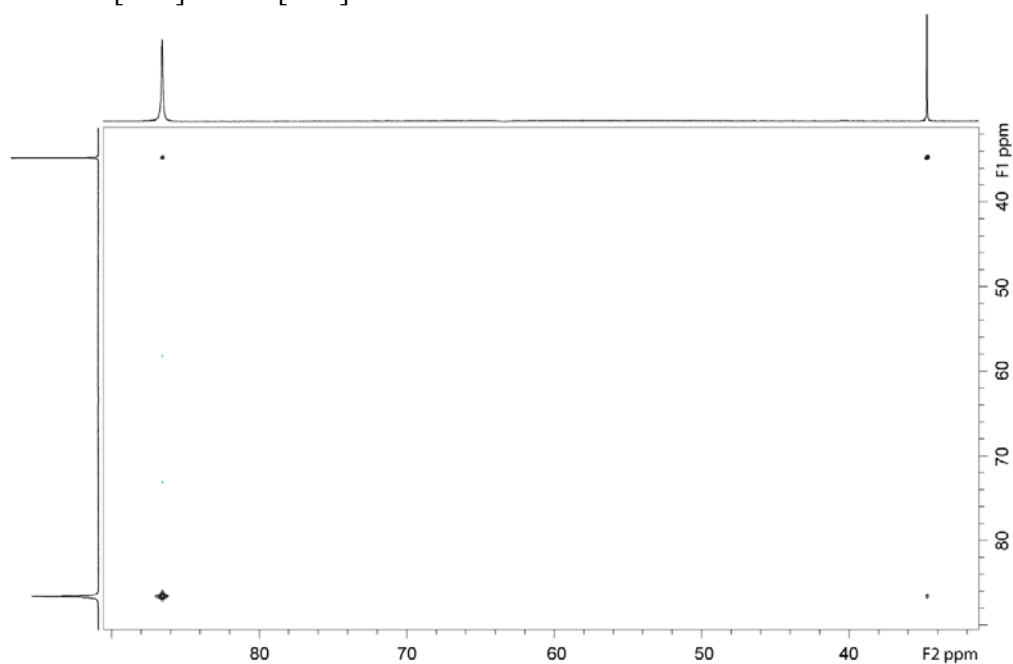

**Figure S 4:**  $^{31}\text{P}\{-}^{31}\text{P}\{-}$ -EXSY NMR-spectrum of a mixture of **22**[OTf], **23**[OTf] and two equivalents of AgOTf in  $\text{CH}_2\text{Cl}_2$  after stirring for 4 h. (300 K,  $\text{C}_6\text{D}_6$  reference)

By slow diffusion of n-pentane in to a  $\text{CH}_2\text{Cl}_2$  solution of **24**[OTf] at  $-30\text{ }^\circ\text{C}$ , single crystals suitable for X-Ray diffraction were obtained.

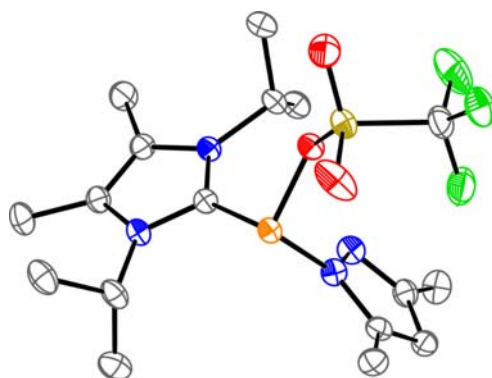

**Figure S 5:** Molecular structure of  $24^+$  in  $24[\text{OTf}]\cdot\text{CH}_2\text{Cl}_2$ ; thermal ellipsoids are displayed at 50 % probability level, solvate molecules, hydrogen atoms and counterions are omitted for clarity

## 2.3. Cycloaddition reactions of 6[OTf] with Nitriles and (Thio)-Cyanates

### 2.3.1. Synthesis of 9a[OTf]<sub>2</sub>

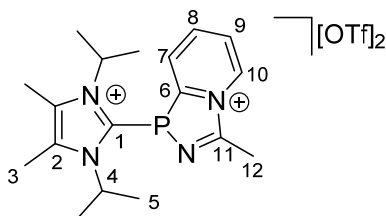

**11[OTf]** (300 mg, 0.630 mmol, 1.0 equiv.) and silver triflate (162 mg, 0.630 mmol, 1.0 equiv.) are suspended in 3 mL of CH<sub>3</sub>CN and stirred at 40 °C for 2 h in a microwave oven. The resulting solid is filtered off and 3 mL of Et<sub>2</sub>O are added to the solution, resulting in the formation of a colourless precipitate. By filtration and washing with Et<sub>2</sub>O, **9a[OTf]<sub>2</sub>** is obtained as a colourless, air

and moisture sensitive solid. Suitable crystals for X-ray diffraction analysis can be obtained by slow diffusion of Et<sub>2</sub>O to a CH<sub>3</sub>CN solution at -30 °C.

**Yield:** 320 mg (81 %); **m.p.** 229 °C (decomp.); **Raman**(80 mW, 200 scans, 298 K, cm<sup>-1</sup>): 3100 (8), 3072 (9), 2990 (27), 2949 (51), 1657 (28), 1606 (35), 1558 (13), 1464 (28), 1448 (25), 1400 (33), 1383 (16), 1368 (21), 1271 (56), 1226 (20), 1193 (18), 1151 (35), 1075 (80), 1037 (100), 887 (18), 804 (15), 755 (38), 709 (13), 604 (11), 573 (23), 558 (13), 544 (17), 519 (20), 348 (33), 313 (41), 291 (16), 269 (18); **IR** (ATR, 298 K, cm<sup>-1</sup>): 3137 (vw), 3071 (vw), 3002 (vw), 2962 (vw), 1655 (w), 1605 (w), 1465 (w), 1412 (w), 1398 (w), 1376 (w), 1257 (vs), 1222 (s), 1192 (w), 1167 (w), 1140 (vs), 1115 (m), 1089 (w), 1029 (s), 802 (w), 778 (w), 753 (w), 634 (vs); **<sup>1</sup>H NMR** (CD<sub>3</sub>CN, 298 K, in ppm)  $\delta$  = 1.39 (6H, d, <sup>3</sup>J<sub>HH</sub> = 6.24 Hz, H5), 1.57 (6H, d, <sup>3</sup>J<sub>HH</sub> = 6.88 Hz, H5), 2.41 (6H, s, H3), 3.13 (3H, d, J<sub>HH</sub> = 7.32 Hz, H12), 4.12 (2H, s(br), H4), 8.40 (1H, m, H9), 8.79 (1H, m, H8), 8.86 (1H, d, <sup>3</sup>J<sub>HH</sub> = 7.88 Hz, H7), 9.63 (1H, m, H10); **<sup>13</sup>C{<sup>1</sup>H} NMR** (CD<sub>3</sub>CN, 298 K, in ppm):  $\delta$  = 11.40 (2C, s, C3), 21.25 (2C, s(br), C5), 18.78 (1C, d, <sup>3</sup>J<sub>CP</sub> = 3 Hz, C12), 21.61 (2C, s(br), C5), 55.21 (1C, s, C4), 55.31 (1C, s, C4), 122.05 (2C, q, <sup>1</sup>J<sub>CF</sub> = 320 Hz, OTf), 127.70 (1C, d, <sup>1</sup>J<sub>CP</sub> = 48 Hz, C1), 129.43 (1C, s, C9), 131.36 (1C, d, <sup>2</sup>J<sub>CP</sub> = 11 Hz, C7), 136.70 (2C, s, C2), 142.85 (1C, d, <sup>3</sup>J<sub>CP</sub> = 3 Hz, C10), 147.04 (1C, d, <sup>3</sup>J<sub>CP</sub> = 6 Hz, C8), 158.74 (1C, d, <sup>1</sup>J<sub>CP</sub> = 29 Hz, C6), 163.04 (1C, m, C11); **<sup>19</sup>F{<sup>1</sup>H} NMR** (CD<sub>3</sub>CN, 298 K, in ppm):  $\delta$  = -79.2 (s); **<sup>31</sup>P{<sup>1</sup>H} NMR** (CD<sub>3</sub>CN, 298 K, in ppm):  $\delta$  = 21.6 (s); **elemental analysis:** calculated for C<sub>20</sub>H<sub>27</sub>F<sub>6</sub>N<sub>4</sub>O<sub>6</sub>PS<sub>2</sub>: N 8.91, C 38.22, H 4.33, S 10.20; found: N 8.81, C 38.40, H 3.99, S 10.19.

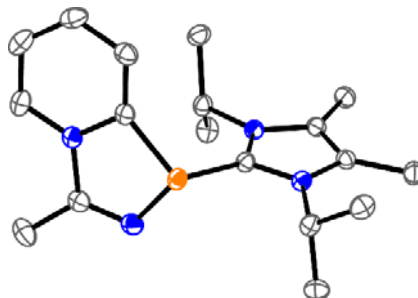

**Figure S 6:** Molecular structure of **9a<sup>2+</sup>** in **9a[OTf]<sub>2</sub>**; thermal ellipsoids are displayed at 50 % probability level, hydrogen atoms and counterions are omitted for clarity.

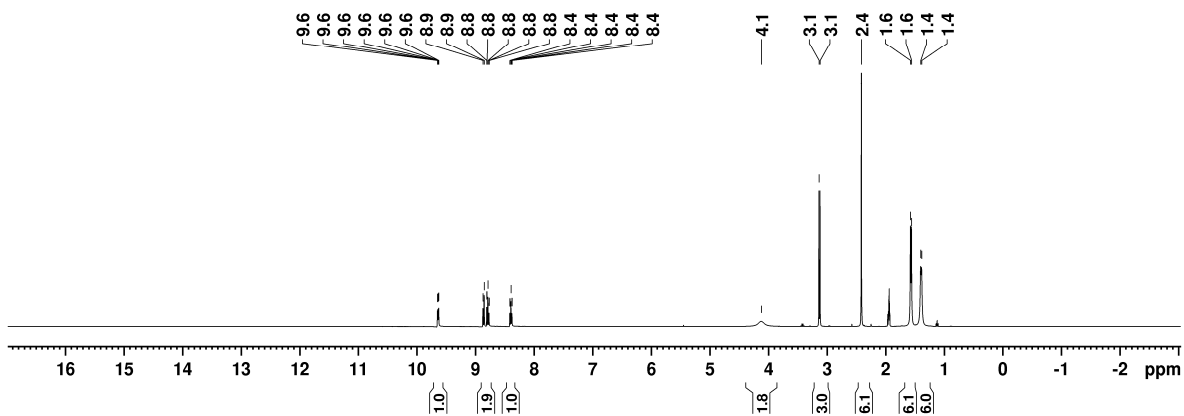

Figure S 7:  $^1\text{H}$  NMR spectrum of  $9\mathbf{a}[\text{OTf}]_2$  in  $\text{CD}_3\text{CN}$ .

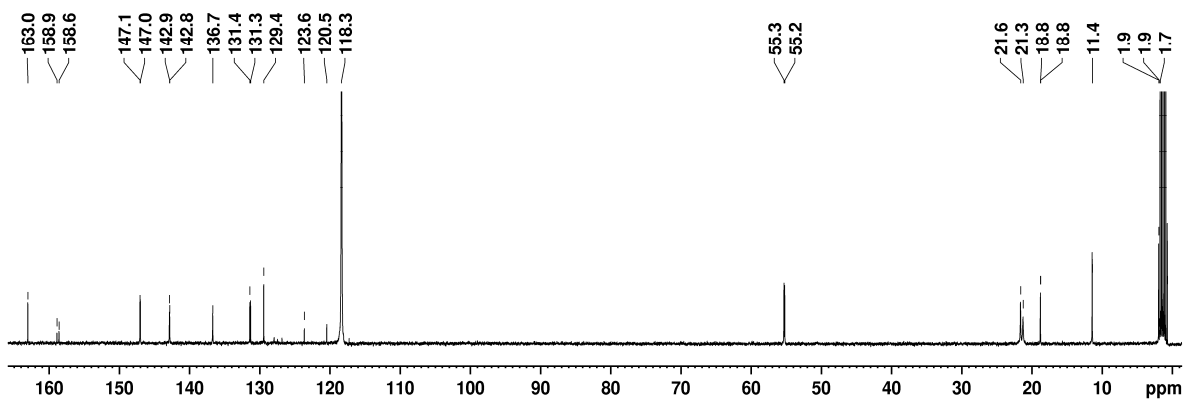

Figure S 8:  $^{13}\text{C}\{^1\text{H}\}$  NMR spectrum of  $9\mathbf{a}[\text{OTf}]_2$  in  $\text{CD}_3\text{CN}$ .

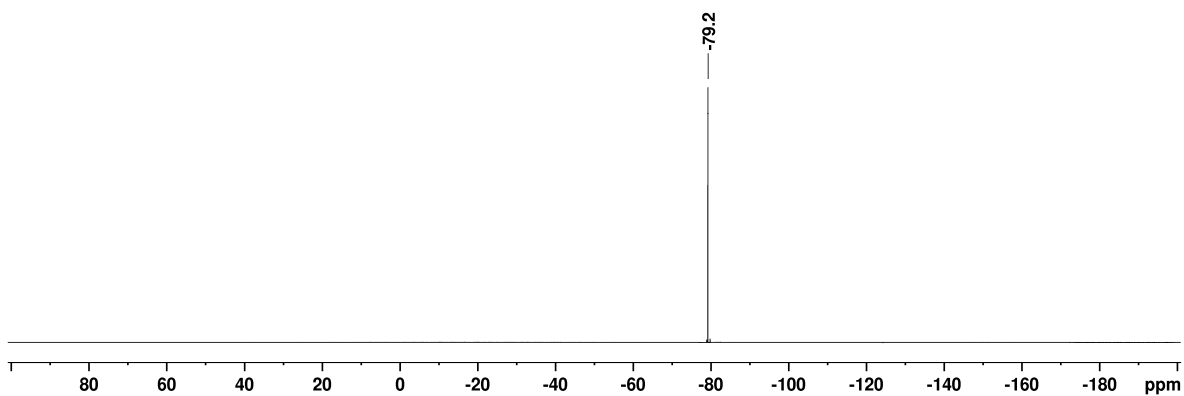

Figure S 9:  $^{19}\text{F}\{^1\text{H}\}$  NMR spectrum of  $9\mathbf{a}[\text{OTf}]_2$  in  $\text{CD}_3\text{CN}$ .

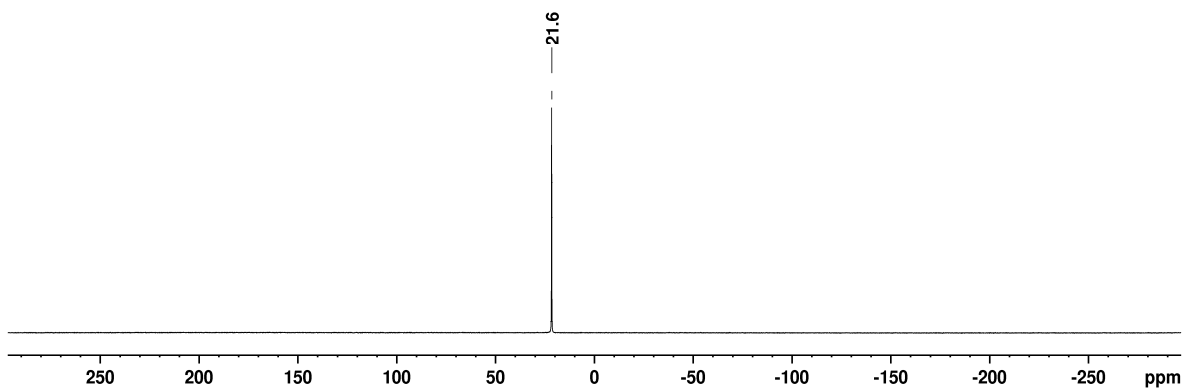

**Figure S 10:**  $^{31}\text{P}\{^1\text{H}\}$  NMR spectrum of **9a**[OTf]<sub>2</sub> in CD<sub>3</sub>CN.

### 2.3.2. Synthesis of **9b**[OTf]<sub>2</sub>

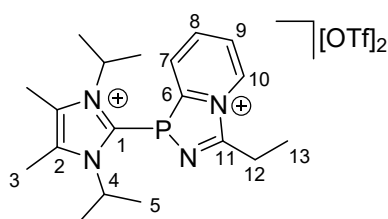

**11**[OTf] (300 mg, 0.630 mmol, 1.0 equiv.) and silver triflate (162 mg, 0.630 mmol, 1.0 equiv.) are suspended in 3 mL of EtCN and stirred at 40 °C for 2 h in a microwave oven. The resulting solid is filtered off and 3 mL of Et<sub>2</sub>O are added to the solution, resulting in the formation of a colourless precipitate. By filtration and washing with Et<sub>2</sub>O, **9b**[OTf]<sub>2</sub> is obtained as a colorless, air

and moisture sensitive solid. Suitable crystals for X-ray diffraction analysis can be obtained by slow diffusion of Et<sub>2</sub>O to a CH<sub>3</sub>CN solution at –30 °C.

**Yield:** 166 mg (41 %); **m.p.** 208 °C (decomp.); **Raman** (20 mW, 200 scans, 298 K, cm<sup>-1</sup>): 3009 (29), 2998 (43), 2984 (43), 2948 (100), 2934 (100), 2902 (29), 2888 (29), 2203 (29), 2185 (29), 2158 (29), 2146 (43), 2137 (43), 2113 (29), 2097 (29), 2076 (29), 2062 (29), 1602 (14), 1505 (43), 1457 (29), 1443 (14), 1403 (29), 1387 (29), 1352 (14), 1295 (14), 1273 (71), 1224 (14), 1149 (29), 1087 (29), 1073 (57), 1055 (29), 1034 (57), 758 (29), 283 (29), 259 (71), 249 (71), 226 (71), 204 (57), 189 (57), 179 (57), 169 (57); **IR** (ATR, 298 K, cm<sup>-1</sup>): 3133 (vw), 3095 (vw), 3005 (vw), 2954 (vw), 1639 (vw), 1603 (w), 1462 (w), 1415 (w), 1400 (w), 1377 (w), 1272 (vs), 1246 (vs), 1222 (vs), 1151 (vs), 1117 (m), 1091 (w), 1073 (w), 1028 (vs), 830 (w), 798 (w), 782 (m), 754 (w), 634 (vs); **<sup>1</sup>H NMR** (CD<sub>3</sub>CN, 298 K, in ppm)  $\delta$  = 1.40 (6H, d, <sup>3</sup>J<sub>HH</sub> = 5.92 Hz, H5), 1.52 (3H, t, <sup>3</sup>J<sub>HH</sub> = 7.06 Hz, H13), 1.57 (6H, d, <sup>3</sup>J<sub>HH</sub> = 6.84 Hz, H5), 2.41 (6H, s, H3), 3.28-3.66 (2H, m, H12), 4.12 (2H, s(br), H4), 8.39 (1H, m, H9), 8.78 (1H, m, H8), 8.84 (1H, d, <sup>3</sup>J<sub>HH</sub> = 7.72 Hz, H7), 9.63 (1H, m, H10); **<sup>13</sup>C{<sup>1</sup>H} NMR** (CD<sub>3</sub>CN, 298 K, in ppm):  $\delta$  = 8.77 (1C, s, C13), 10.38 (2C, s, C3), 20.25 (2C, s, C5), 20.61 (2C, s, C5), 24.70 (1C, s, C12), 54.15 (1C, s, C4) 54.26 (1C, s, C4), 121.06 (2C, q, <sup>1</sup>J<sub>CF</sub> = 320 Hz, OTf), 126.73 (1C, d, <sup>1</sup>J<sub>CP</sub> = 52 Hz, C1), 128.45 (1C, s, C9), 130.46 (1C, d, <sup>2</sup>J<sub>CP</sub> = 11.53 Hz, C7), 135.69 (2C, s, C2), 141.29 (1C, d, <sup>3</sup>J<sub>CP</sub> = 2.39 Hz, C10), 146.14 (1C, d, <sup>3</sup>J<sub>CP</sub> = 6.18 Hz, C8), 158.08 (1C, d, <sup>1</sup>J<sub>CP</sub> = 28.95 Hz, C6), 166.06 (1C, s, C11); **<sup>19</sup>F{<sup>1</sup>H} NMR** (CD<sub>3</sub>CN, 298 K, in ppm):  $\delta$  = -79.3 (s); **<sup>31</sup>P{<sup>1</sup>H} NMR** (CD<sub>3</sub>CN, 298 K, in ppm):  $\delta$  = 22.6 (s); **elemental analysis:** calculated for C<sub>21</sub>H<sub>29</sub>F<sub>6</sub>N<sub>4</sub>O<sub>6</sub>PS<sub>2</sub>: N 8.72, C 39.25, H 4.55, S 9.98; found: N 8.70, C 39.23, H 4.33, S 9.99.

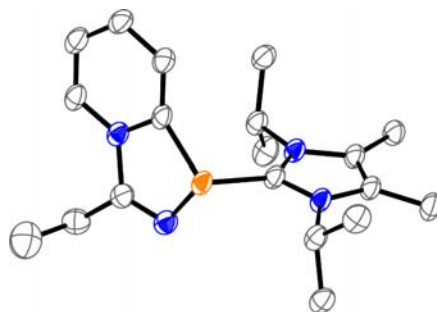

**Figure S 11:** Molecular structure of **9b**<sup>2+</sup> in **9b**[OTf]<sub>2</sub>; thermal ellipsoids are displayed at 50 % probability level, hydrogen atoms and counterions are omitted for clarity.

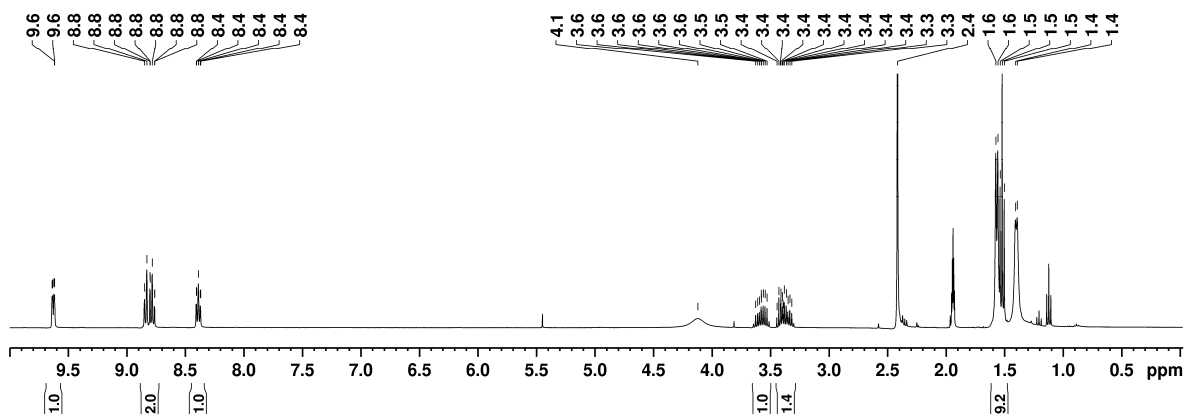

Figure S 12:  $^1\text{H}$  NMR spectrum of **9b**[OTf] $_2$  in  $\text{CD}_3\text{CN}$ .

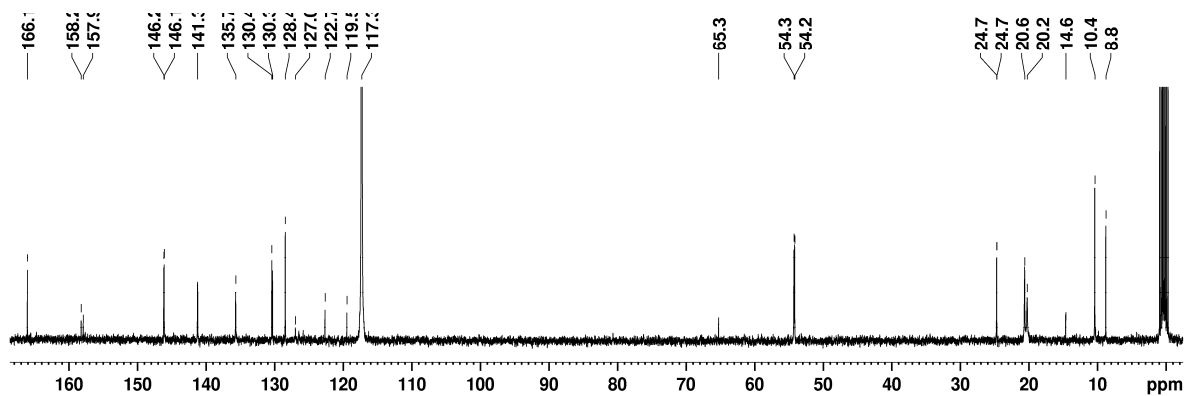

Figure S 13:  $^{13}\text{C}\{^1\text{H}\}$  NMR spectrum of **9b**[OTf] $_2$  in  $\text{CD}_3\text{CN}$ .

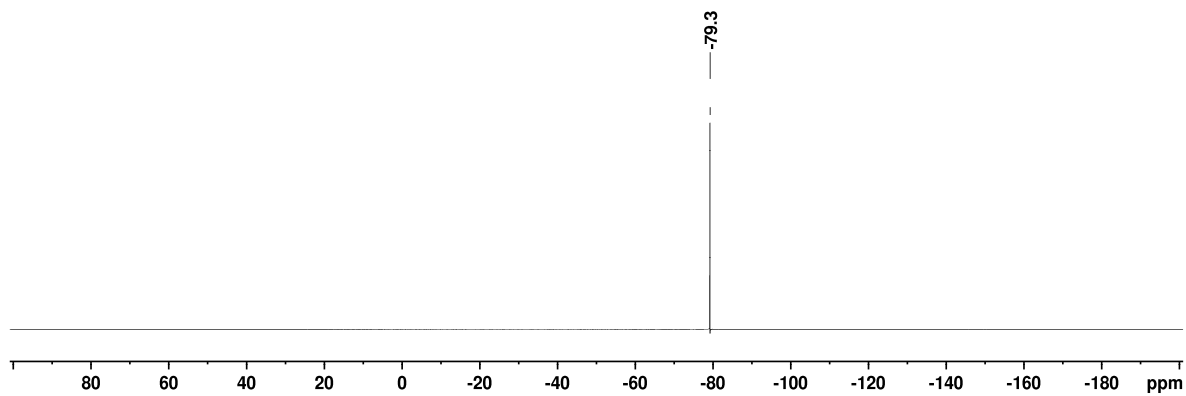

Figure S 14:  $^{19}\text{F}\{^1\text{H}\}$  NMR spectrum of **9b**[OTf] $_2$  in  $\text{CD}_3\text{CN}$ .

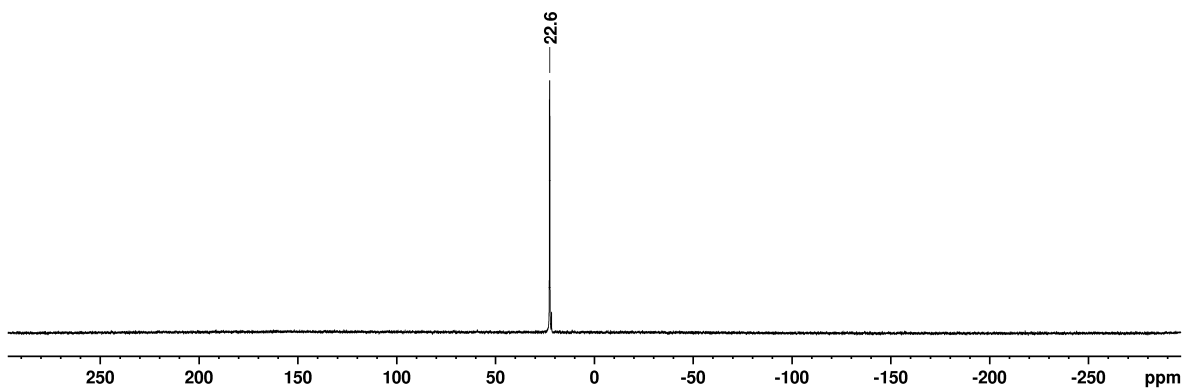

**Figure S 15:**  $^{31}\text{P}\{^1\text{H}\}$  NMR spectrum of **9b**[OTf]<sub>2</sub> in CD<sub>3</sub>CN.



### 2.3.3. Synthesis of **9c**[OTf]<sub>2</sub>

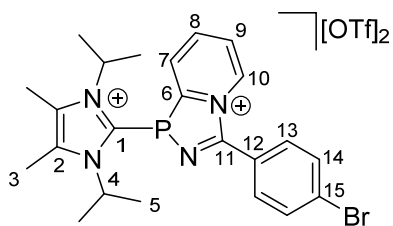

**11**[OTf] (200 mg, 0.422 mmol, 1.0 equiv.), silver triflate (108 mg, 0.422 mmol, 1.0 equiv.) and 4-bromobenzonitrile (83 mg, 0.430 mmol, 1.0 equiv.) are suspended in 3 mL of C<sub>2</sub>H<sub>4</sub>Cl<sub>2</sub> and stirred for 2 h. The resulting solid is filtered off and all volatiles are removed *in vacuo*. By washing with Et<sub>2</sub>O and filtration, **9c**[OTf]<sub>2</sub> is obtained as a colourless, air and moisture sensitive solid.

solid.

**Yield:** 266 mg (82 %); **m.p.** 125 °C (decomp.); **Raman** (80 mW, 200 scans, 298 K, cm<sup>-1</sup>): 1623 (31), 1599 (100), 1555 (27), 1542 (18), 1454 (25), 1380 (12), 1276 (11), 1196 (22), 1096 (13), 1067 (12), 1045 (12), 1033 (14), 935 (14), 806 (18), 419 (23), 174 (14); **IR** (ATR, 298 K, cm<sup>-1</sup>): 1625 (vw), 1599 (vw), 1587 (vw), 1461 (w), 1399 (w), 1378 (vw), 1254 (s), 1222 (s), 1149 (s), 1100 (m), 1071 (w), 1027 (vs), 942 (w), 903 (vw), 839 (w), 788 (w), 754 (w), 712 (vw), 675 (w), 635 (vs), 572 (m), 547 (w), 516 (s), 500 (m), 452 (w), 427 (w); **<sup>1</sup>H NMR** (CD<sub>2</sub>Cl<sub>2</sub>, 298 K, in ppm)  $\delta$  = 1.55 (6H, d, <sup>3</sup>J<sub>HH</sub> = 6.60 Hz, H5), 1.65 (6H, d, <sup>3</sup>J<sub>HH</sub> = 6.60 Hz, H5), 2.47 (6H, s, H3), 4.47 (2H, s(br), H4), 7.89 (2H, d, <sup>3</sup>J<sub>HH</sub> = 8.52 Hz, H13), 7.99 (2H, d, <sup>3</sup>J<sub>HH</sub> = 8.50 Hz, H14), 8.33 (1H, m, H9), 8.75 (1H, m, H8), 9.36 (1H, d, <sup>3</sup>J<sub>HH</sub> = 7.84 Hz, H7), 9.44 (1H, d, <sup>3</sup>J<sub>HH</sub> = 9.43 Hz, H10); **<sup>13</sup>C{<sup>1</sup>H} NMR** (CD<sub>2</sub>Cl<sub>2</sub>, 298 K, in ppm):  $\delta$  = 10.99 (2C, s, C3), 20.98 (2C, s, C5), 21.05 (2C, s, C5), 55.06 (1C, s, C4), 55.17 (1C, s, C4), 120.04 (2C, q, <sup>1</sup>J<sub>CF</sub> = 319 Hz, OTf), 124.73 (1C, s, C15), 128.59 (1C, s(br), C1), 129.22 (1C, s, C9), 131.94 (1C, d, <sup>2</sup>J<sub>CP</sub> = 13 Hz, C7), 131.98 (1C, s, C12), 132.15 (2C, s, C14), 133.11 (2C, s, C13), 134.89 (2C, s, C2), 142.69 (1C, s, C10), 145.70 (1C, d, <sup>3</sup>J<sub>CP</sub> = 6 Hz, C8), 157.90 (1C, d, <sup>1</sup>J<sub>CP</sub> = 33 Hz, C6), 160.13 (1C, s, C11); **<sup>19</sup>F{<sup>1</sup>H} NMR** (CD<sub>2</sub>Cl<sub>2</sub>, 298 K, in ppm):  $\delta$  = -78.6 (s); **<sup>31</sup>P{<sup>1</sup>H} NMR** (CD<sub>2</sub>Cl<sub>2</sub>, 298 K, in ppm):  $\delta$  = 27.0 (s); **elemental analysis:** calculated for C<sub>25</sub>H<sub>28</sub>BrF<sub>6</sub>N<sub>4</sub>O<sub>6</sub>PS<sub>2</sub>·0.25 Et<sub>2</sub>O·MeCN: N 8.45, C 40.56, H 4.07, S 7.73; found: N 8.43, C 40.72, H 3.48, S 9.54. We found repeatable inconclusive results for the sulphur value in the elemental analysis of this compound and therefore abstain of any further analysis.

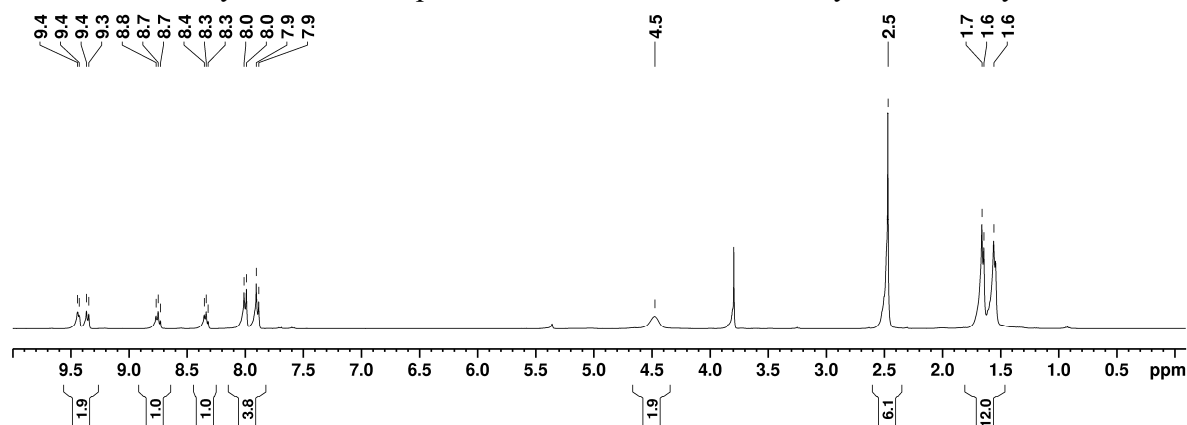

**Figure S 16:** <sup>1</sup>H NMR spectrum of **9c**[OTf]<sub>2</sub> in CD<sub>2</sub>Cl<sub>2</sub>.

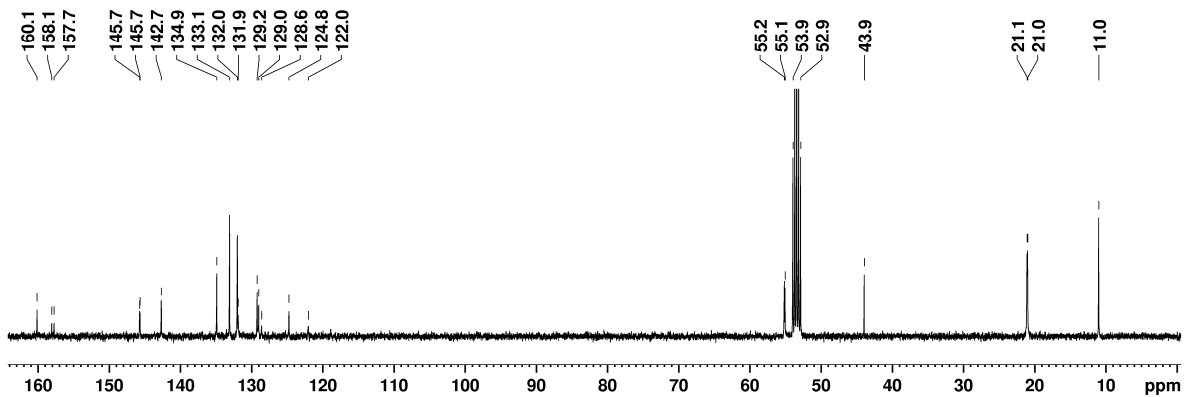

Figure S 17:  $^{13}\text{C}\{^1\text{H}\}$  NMR spectrum of **9c**[OTf] $_2$  in  $\text{CD}_2\text{Cl}_2$ .

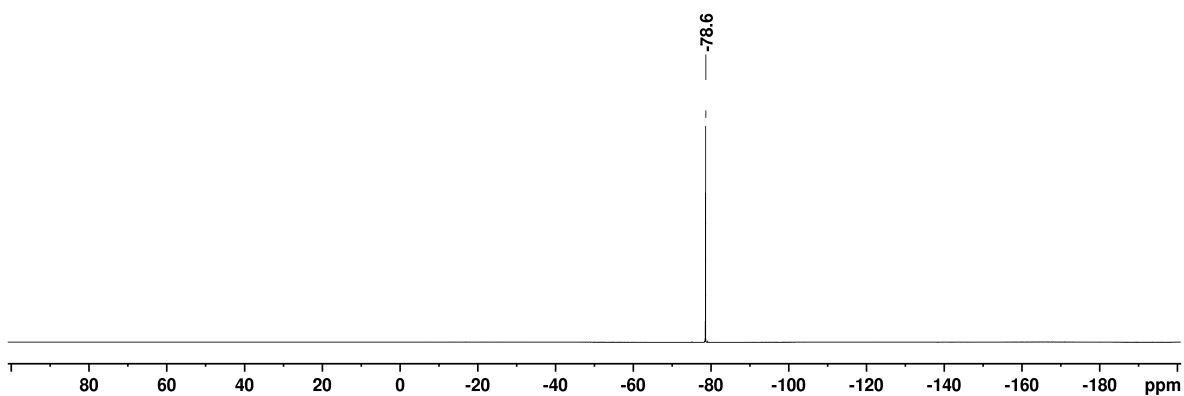

Figure S 18:  $^{19}\text{F}\{^1\text{H}\}$  NMR spectrum of **9c**[OTf] $_2$  in  $\text{CD}_2\text{Cl}_2$ .

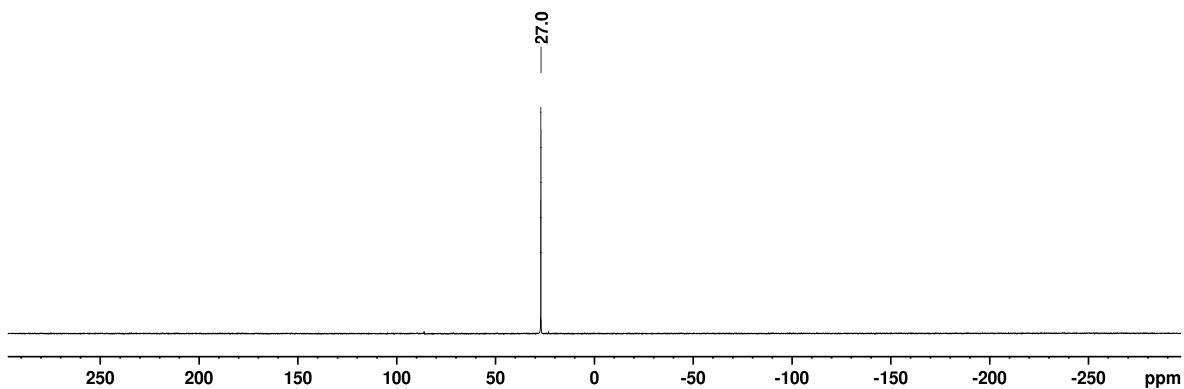

Figure S 19:  $^{31}\text{P}\{^1\text{H}\}$  NMR spectrum of **9c**[OTf] $_2$  in  $\text{CD}_2\text{Cl}_2$ .

### 2.3.4. Synthesis of **9d**[OTf]<sub>2</sub>

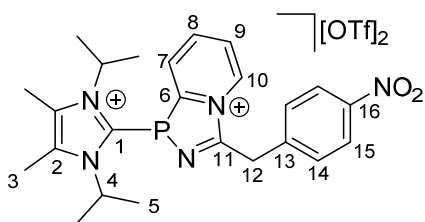

**11**[OTf] (300 mg, 0.630 mmol, 1.0 equiv.), silver triflate (162 mg, 0.630 mmol, 1.0 equiv.) and 4-nitrophenylacetonitrile (112 mg, 0.690 mmol, 1.1 equiv.) are suspended in 3 mL of C<sub>2</sub>H<sub>4</sub>Cl<sub>2</sub> and stirred at 40 °C for 2 h in a microwave oven. The resulting solid is filtered off and 3 mL of Et<sub>2</sub>O are added to the solution, resulting in the formation of a colourless precipitate.

By filtration and washing with Et<sub>2</sub>O, **9d**[OTf]<sub>2</sub> is obtained as a colourless, air and moisture sensitive solid. Suitable crystals for X-ray diffraction analysis can be obtained by slow diffusion of Et<sub>2</sub>O to a CH<sub>3</sub>CN solution at -30 °C.

**Yield:** 390 mg (82 %); **m.p.** 211 °C (decomp.); **Raman**(80 mW, 200 scans, 298 K, cm<sup>-1</sup>): 3085 (11), 2950 (18), 2920 (14), 1637 (15), 1603 (45), 1402 (18), 1353 (100), 1267 (33), 1149 (17), 1133 (26), 1114 (24), 1076 (37), 1035 (42), 862 (20), 756 (22), 573 (16), 350 (21), 314 (18); **IR** (ATR, cm<sup>-1</sup>): 3112 (vw), 2977 (vw), 1635 (vw), 1600 (w), 1524 (w), 1461 (w), 1406 (w), 1396 (w), 1377 (vw), 1354 (m), 1301 (w), 1275 (s), 1256 (vs), 1224 (m), 1146 (s), 1116 (m), 1091 (w), 1075 (w), 1028 (vs), 979 (vw), 924 (vw), 905 (vw), 887 (vw), 861 (vw), 842 (w), 808 (w), 787 (w), 755 (w), 738 (w), 711 (vw), 695 (vw), 661 (vw), 633 (vs); **<sup>1</sup>H NMR** (CD<sub>3</sub>CN, 298 K, in ppm)  $\delta$  = 1.39 (6H, s(br), H5), 1.54 (6H, m, H5), 2.39 (6H, s, H3), 2.40 (6H, s, H3), 4.14 (2H, s,(br), H4), 4.75 (1H, ddd, <sup>2</sup>J<sub>HH</sub> = 18.57 Hz, <sup>4</sup>J<sub>HH</sub> = 2.94 Hz, D<sub>HH</sub> = 6.06 Hz, H12a) 5.02 (1H, dd, <sup>2</sup>J<sub>HH</sub> = 18.55 Hz, <sup>4</sup>J<sub>HH</sub> = 13.45 Hz, H12b), 7.51 (4H, d, <sup>3</sup>J<sub>HH</sub> = 2.0 Hz, H14/15), 8.45 (1H, m, H9), 8.83 (2H, m, H7/8), 9.78 (1H, m, H10); **<sup>13</sup>C{<sup>1</sup>H} NMR** (CD<sub>3</sub>CN, 298 K, in ppm):  $\delta$  = 11.41 (2C, s, C3), 21.22 (2C, s, C5), 21.69 (2C, s, C5), 37.81 (1C, s, C12), 55.25 (1C, s, C4), 55.34 (1C, s, C4), 121.77 (2C, q, <sup>1</sup>J<sub>CF</sub> = 317 Hz, OTf), 126.98 (1C, s, C13), 127.16 (1C, d, <sup>1</sup>J<sub>CP</sub> = 44 Hz, C1), 129.55 (1C, s, C9), 131.38 (1C, d, <sup>2</sup>J<sub>CP</sub> = 12 Hz, C7), 131.89 (4C, s, C14/15), 136.95 (3C, s, C2), 142.27 (1C, m, C10), 145.69 (1C, s, C16), 147.38 (1C, d, <sup>3</sup>J<sub>CP</sub> = 7 Hz, C8), 159.19 (1C, d, <sup>1</sup>J<sub>CP</sub> = 29 Hz, C7), 165.77 (1C, d, <sup>2</sup>J<sub>CP</sub> = 4 Hz, C11); **<sup>19</sup>F{<sup>1</sup>H} NMR** (CD<sub>3</sub>CN, 298 K, in ppm):  $\delta$  = -79.3 (s); **<sup>31</sup>P{<sup>1</sup>H} NMR** (CD<sub>3</sub>CN, 298 K, in ppm):  $\delta$  = 22.1 (s); **elemental analysis:** calculated for C<sub>26</sub>H<sub>30</sub>F<sub>6</sub>N<sub>5</sub>O<sub>8</sub>PS<sub>2</sub>: N 9.34, C 41.66, H 4.03, S 8.55; found: N 9.16, C 41.58, H 3.87, S 8.54.

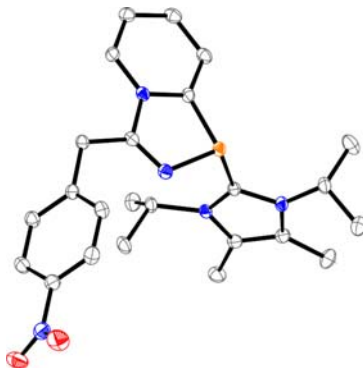

**Figure S 20:** Molecular structure of **9d**<sup>2+</sup> in **9d**[OTf]<sub>2</sub>; thermal ellipsoids are displayed at 50 % probability level, hydrogen atoms and counterions are omitted for clarity.

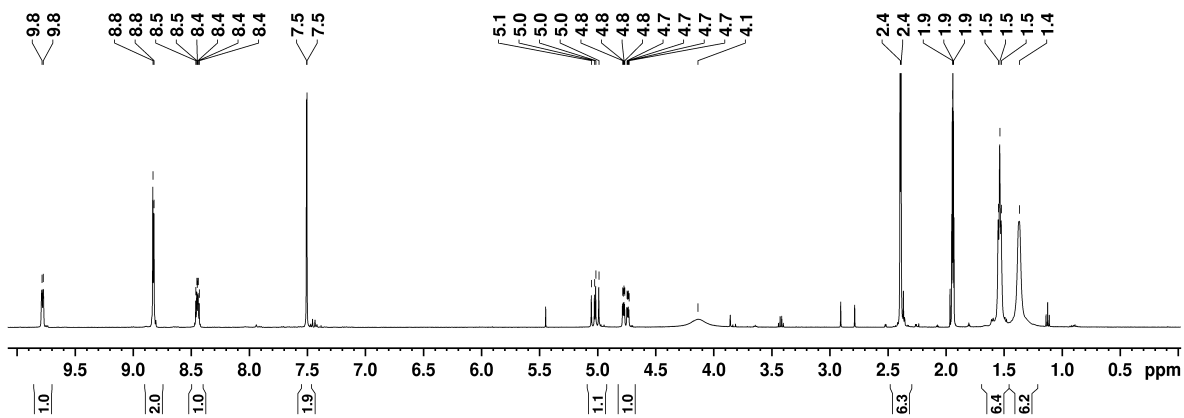

Figure S 21:  $^1\text{H}$  NMR spectrum of  $9\text{d}[\text{OTf}]_2$  in  $\text{CD}_3\text{CN}$ .

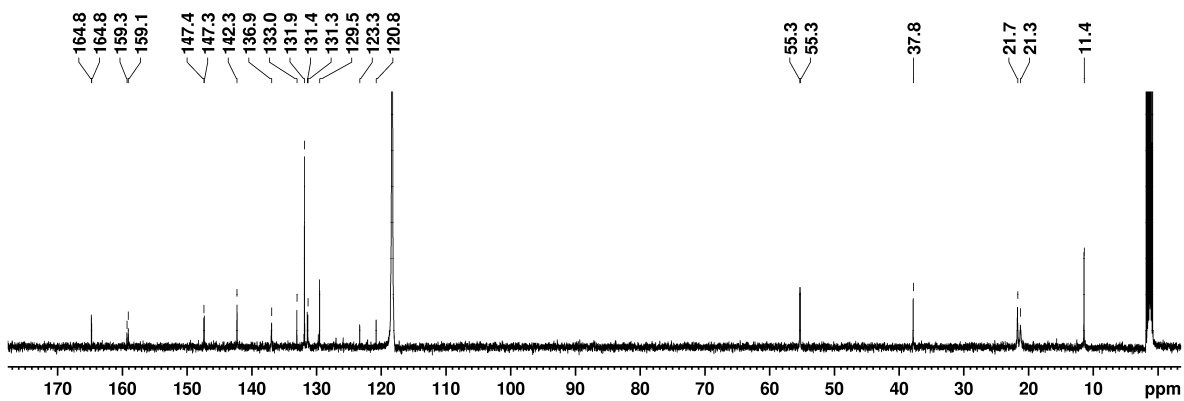

Figure S 22:  $^{13}\text{C}\{^1\text{H}\}$  NMR spectrum of  $9\text{d}[\text{OTf}]_2$  in  $\text{CD}_3\text{CN}$ .

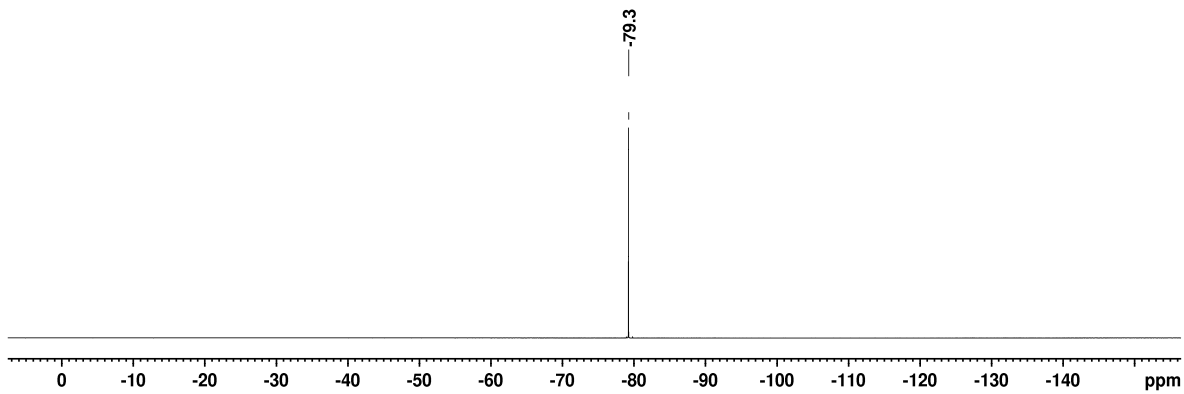

Figure S 23:  $^{19}\text{F}\{^1\text{H}\}$  NMR spectrum of  $9\text{d}[\text{OTf}]_2$  in  $\text{CD}_3\text{CN}$ .

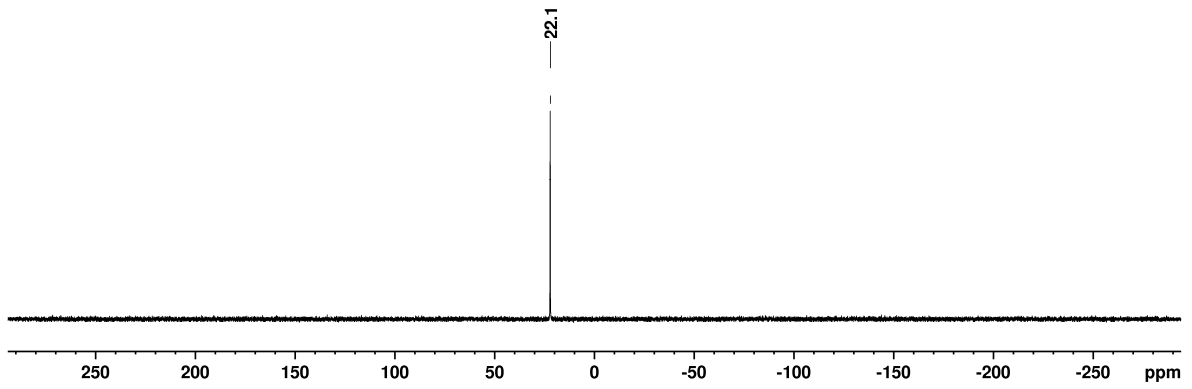

**Figure S 24:**  $^{31}\text{P}\{^1\text{H}\}$  NMR spectrum of  $9\text{d}[\text{OTf}]_2$  in  $\text{CD}_3\text{CN}$ .

### 2.3.5. Synthesis of **9e**[OTf]<sub>2</sub>

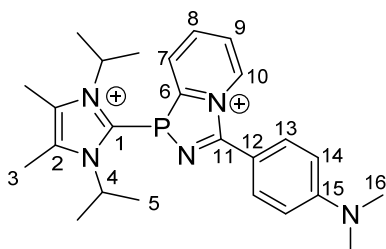

**11**[OTf] (200 mg, 0.422 mmol, 1.0 equiv.), silver triflate (108 mg, 0.422 mmol, 1.0 equiv.) and 4-(dimethylamino)benzotrile (62 mg, 0.430 mmol, 1.0 equiv.) are suspended in 3 mL of C<sub>2</sub>H<sub>4</sub>Cl<sub>2</sub> and stirred at 40 °C for 2 h in a microwave oven. The resulting solid is filtered off and 3 mL of Et<sub>2</sub>O are added to the solution, resulting in the formation of a deep red precipitate. By filtration and washing with Et<sub>2</sub>O, **9e**[OTf]<sub>2</sub> is obtained as a red,

air and moisture sensitive solid. Suitable crystals for X-ray diffraction analysis can be obtained by vapour diffusion of Et<sub>2</sub>O to a CH<sub>3</sub>CN solution at -30 °C.

**Yield:** 261 mg (84 %); **m.p.** 153 °C; **Raman** (80 mW, 200 scans, 298 K, cm<sup>-1</sup>): 1623 (31), 1599 (100), 1555 (27), 1542 (18), 1454 (25), 1380 (12), 1276 (11), 1196 (22), 1096 (13), 1067 (12), 1045 (12), 1033 (14), 935 (14), 806 (18), 419 (23), 174 (14); **IR** (ATR, 298 K, cm<sup>-1</sup>): 1596 (m), 1529 (w), 1458 (vw), 1442 (w), 1430 (vw), 1401 (vw), 1379 (w), 1276 (s), 1258 (s), 1244 (s), 1223 (s), 1194 (m), 1149 (s), 1094 (w), 1067 (w), 1028 (vs), 934 (w), 828 (w), 803 (m), 753 (w), 741 (w), 679 (w), 635 (vs), 572 (w), 548 (w), 516 (m); **<sup>1</sup>H NMR** (CD<sub>2</sub>Cl<sub>2</sub>, 298 K, in ppm) δ = 1.50 (6H, d, <sup>3</sup>J<sub>HH</sub> = 6.72 Hz, H5), 1.60 (6H, d, <sup>3</sup>J<sub>HH</sub> = 6.72 Hz, H5), 2.42 (6H, s, H3), 3.15 (6H, s, H16), 4.39 (2H, s(br), H4), 6.91 (2H, s(br), H13), 7.99 (2H, d, <sup>3</sup>J<sub>HH</sub> = 8.62 Hz, H14), 8.34 (1H, m, H9), 8.67 (1H, m, H8), 9.32 (1H, d, <sup>3</sup>J<sub>HH</sub> = 7.92 Hz, H7), 9.70 (1H, d, <sup>3</sup>J<sub>HH</sub> = 5.68 Hz, H10); **<sup>13</sup>C{<sup>1</sup>H} NMR** (CD<sub>2</sub>Cl<sub>2</sub>, 298 K, in ppm): δ = 10.97 (2C, s, C3), 21.20 (4C, s, C5), 40.1 (2C, s, C16), 54.60 (1C, s, C4), 54.71 (1C, s, C4), 111.90 (2C, s, C14), 114.98 (1C, s, C12), 120.63 (2C, q, <sup>1</sup>J<sub>CF</sub> = 319 Hz, OTf), 129.03 (1C, s, C9), 129.80 (1C, d, <sup>1</sup>J<sub>CP</sub> = 54 Hz, C1), 132.11 (1C, d, <sup>2</sup>J<sub>CP</sub> = 12 Hz, C7), 132.52 (2C, s, C13), 134.70 (2C, s, C2), 142.72 (1C, s, C10), 145.27 (1C, d, <sup>3</sup>J<sub>CP</sub> = 6 Hz, C8), 154.03 (1C, s, C15), 158.65 (1C, d, <sup>1</sup>J<sub>CP</sub> = 34 Hz, C6), 161.39 (1C, s(br), C11); **<sup>19</sup>F{<sup>1</sup>H} NMR** (CD<sub>2</sub>Cl<sub>2</sub>, 298 K, in ppm): δ = -78.8 (s); **<sup>31</sup>P{<sup>1</sup>H} NMR** (CD<sub>2</sub>Cl<sub>2</sub>, 298 K, in ppm): δ = 27.7 (s); **elemental analysis:** calculated for C<sub>26</sub>H<sub>30</sub>F<sub>6</sub>N<sub>5</sub>O<sub>8</sub>PS<sub>2</sub>·0.2 C<sub>5</sub>H<sub>12</sub>: N 9.00, C 43.20, H 4.51, S 8.24; found: N 9.23, C 43.29, H 4.84, S 8.66.

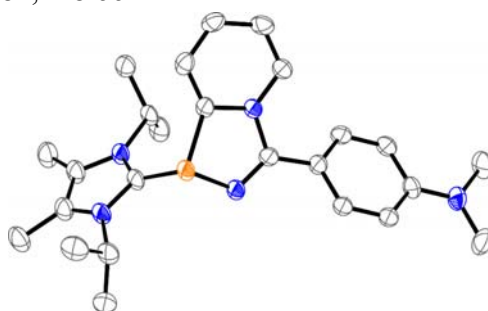

**Figure S 25:** Molecular structure of **9e**<sup>2+</sup> in **9e**[OTf]<sub>2</sub>·0.25 MeCN; thermal ellipsoids are displayed at 50 % probability level, hydrogen atoms, solvate molecules and counterions are omitted for clarity.

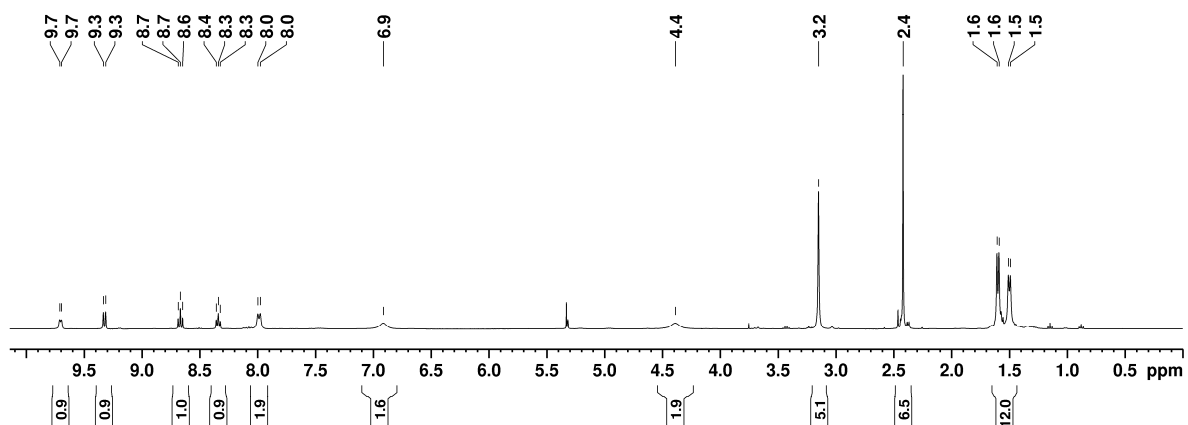

Figure S 26:  $^1\text{H}$  NMR spectrum of  $9\text{e}[\text{OTf}]_2$  in  $\text{CD}_2\text{Cl}_2$ .

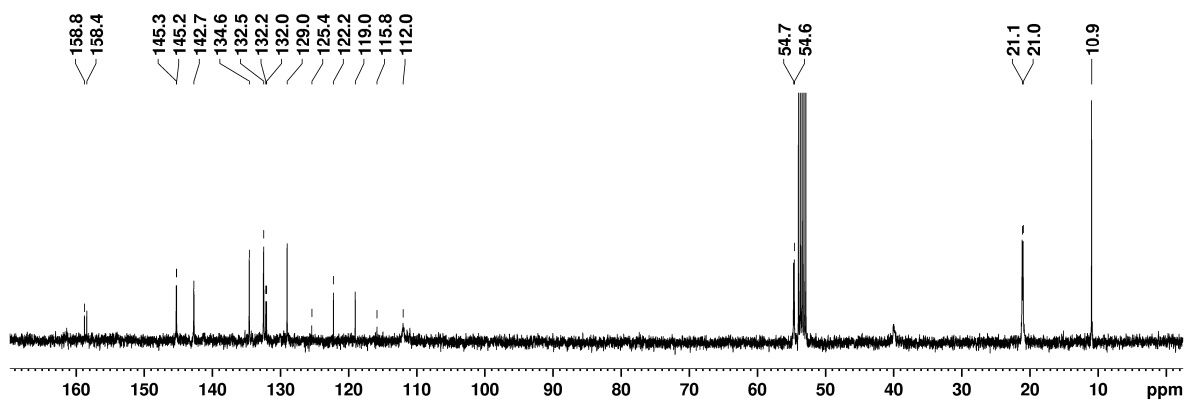

Figure S 27:  $^{13}\text{C}\{^1\text{H}\}$  NMR spectrum of  $9\text{e}[\text{OTf}]_2$  in  $\text{CD}_2\text{Cl}_2$ .

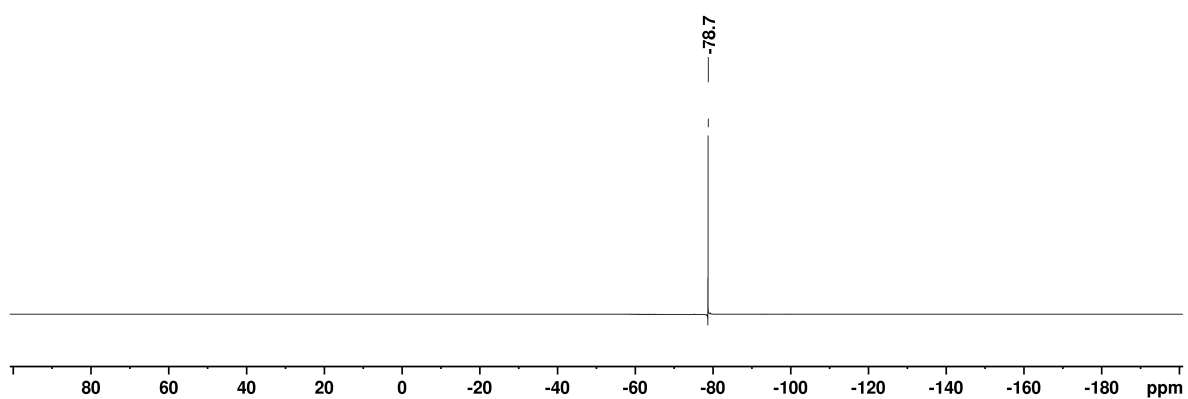

Figure S 28:  $^{19}\text{F}\{^1\text{H}\}$  NMR spectrum of  $9\text{e}[\text{OTf}]_2$  in  $\text{CD}_2\text{Cl}_2$ .

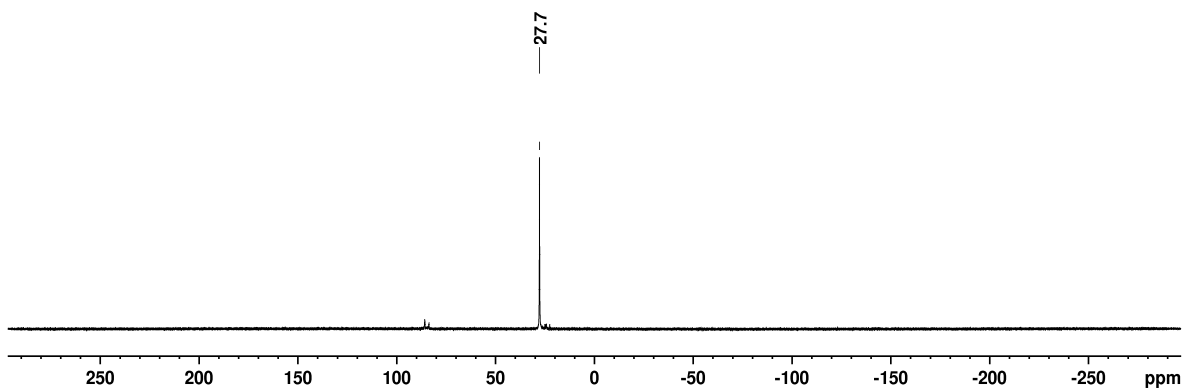

**Figure S 29:**  $^{31}\text{P}\{^1\text{H}\}$  NMR spectrum of  $9\mathbf{e}[\text{OTf}]_2$  in  $\text{CD}_2\text{Cl}_2$ .



### 2.3.6. Synthesis of $\mathbf{9f[OTf]_4}$

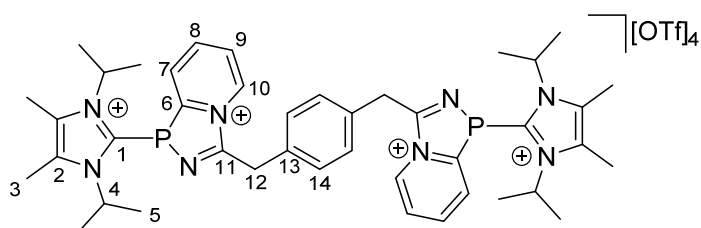

$\mathbf{11[OTf]}$  (300 mg, 0.630 mmol, 1.0 equiv.), silver triflate (162 mg, 0.630 mmol, 1.0 equiv.) and 1,4-phenylenediacetonitrile (50 mg, 0.32 mmol, 0.5 equiv.) are suspended in 3 mL of  $\text{C}_2\text{H}_4\text{Cl}_2$  and stirred for 36 h.

The resulting solid is filtered off and 3 mL of  $\text{Et}_2\text{O}$  are added to the solution, resulting in the formation of a colorless precipitate. By filtration and washing with  $\text{Et}_2\text{O}$ ,  $\mathbf{9f[OTf]_4}$  is obtained as a colorless, air and moisture sensitive solid. Suitable crystals for X-ray diffraction analysis can be obtained by slow diffusion of  $\text{Et}_2\text{O}$  to a  $\text{CH}_3\text{CN}$  solution at  $-30\text{ }^\circ\text{C}$ .

**Yield:** 280 mg (67 %); **m.p.**  $154\text{ }^\circ\text{C}$  (decomp.); **Raman** (60 mW, 100 scans,  $\text{cm}^{-1}$ ): 3084 (29), 3065 (29), 3010 (29), 2995 (29), 2980 (29), 2972 (29), 2945 (57), 2915 (29), 2884 (29), 1650 (29), 1640 (29), 1622 (29), 1600 (43), 1461 (29), 1270 (29), 1137 (43), 1072 (71), 1036 (100), 886 (14), 839 (14), 756 (29), 621 (29), 600 (29), 583 (43), 562 (43), 545 (29), 537 (43), 526 (29), 517 (43), 500 (29), 349 (43); **IR** (ATR, 298 K,  $\text{cm}^{-1}$ ): 3101 (vw), 1635 (vw), 1597 (vw), 1520 (vw), 1462 (vw), 1408 (vw), 1377 (vw), 1257 (vs), 1224 (w), 1155 (m), 1091 (vw), 1071 (vw), 1030 (s), 903 (vw), 815 (w), 786 (vw), 756 (vw), 730 (vw), 706 (vw), 637 (vs);  **$^1\text{H NMR}$**  ( $\text{CD}_3\text{CN}$ , 298 K, in ppm)  $\delta$  = 1.37 (12H, d,  $^3J_{\text{HH}} = 5.72\text{ Hz}$ , H5), 1.54 (12H, m, H5), 2.38 (6H, s, H3), 2.39 (6H, s, H3), 4.13 (4H, s, (br), H4), 4.76 (2H, ddd,  $^2J_{\text{HH}} = 18.54\text{ Hz}$ ,  $^4J_{\text{HH}} = 1.99\text{ Hz}$ ,  $D_{\text{HH}} = 6.01\text{ Hz}$ , H12a), 5.02 (2H, dd,  $^2J_{\text{HH}} = 18.59\text{ Hz}$ ,  $^4J_{\text{HH}} = 13.38\text{ Hz}$ , H12b), 7.58 (4H, d,  $^3J_{\text{HH}} = 1.56\text{ Hz}$ , H14), 8.44 (2H, dt,  $^3J_{\text{HH}} = 9.54\text{ Hz}$ ,  $^4J_{\text{HH}} = 2.45\text{ Hz}$ , H9), 8.83 (4H, m, H7/8), 9.79 (2H, m, H10);  **$^{13}\text{C}\{^1\text{H}\}$  NMR** ( $\text{CD}_3\text{CN}$ , 298 K, in ppm):  $\delta$  = 10.40 (4C, s, C3), 20.22 (4C, s, C5), 20.69 (4C, s, C5), 36.79 (2C, s, C12), 54.23 (1C, s, C4), 54.33 (1C, s, C4), 121.04 (4C, q,  $^1J_{\text{CF}} = 320\text{ Hz}$ , OTf), 126.19 (2C, d,  $^1J_{\text{CP}} = 47\text{ Hz}$ , C1) 128.49 (2C, s, C9), 130.36 (2C, d,  $^2J_{\text{CP}} = 11\text{ Hz}$ , C7), 130.84 (4C, s, C14), 132.03 (2C, s, C13), 135.91 (4C, s, C2), 141.32 (2C, s, C10), 146.32 (2C, d,  $^3J_{\text{CP}} = 6\text{ Hz}$ , C8), 158.16 (2C, d,  $^1J_{\text{CP}} = 28\text{ Hz}$ , C6), 163.79 (2C, d,  $^2J_{\text{CP}} = 4\text{ Hz}$ , C11);  **$^{19}\text{F}\{^1\text{H}\}$  NMR** ( $\text{CD}_3\text{CN}$ , 298 K, in ppm):  $\delta$  =  $-79.2\text{ (s)}$ ;  **$^{31}\text{P}\{^1\text{H}\}$  NMR** ( $\text{CD}_3\text{CN}$ , 298 K, in ppm):  $\delta$  =  $22.1\text{ (s)}$ ; **elemental analysis:** calculated for  $\text{C}_{46}\text{H}_{56}\text{F}_{12}\text{N}_8\text{O}_{12}\text{P}_2\text{S}_4$ : N 8.42, C 41.51, H 4.24, S 9.63; found: N 8.38, C 41.34, H 3.80, S 9.64.

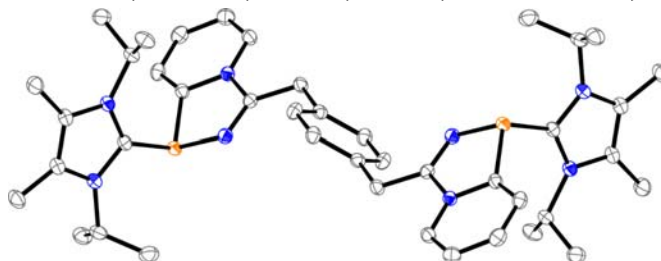

**Figure S 30:** Molecular structure of  $\mathbf{9f}^{4+}$  in  $\mathbf{9f[OTf]_4} \cdot 2\text{ MeCN}$ ; thermal ellipsoids are displayed at 50% probability level, hydrogen atoms, solvate molecules and counterions are omitted for clarity.

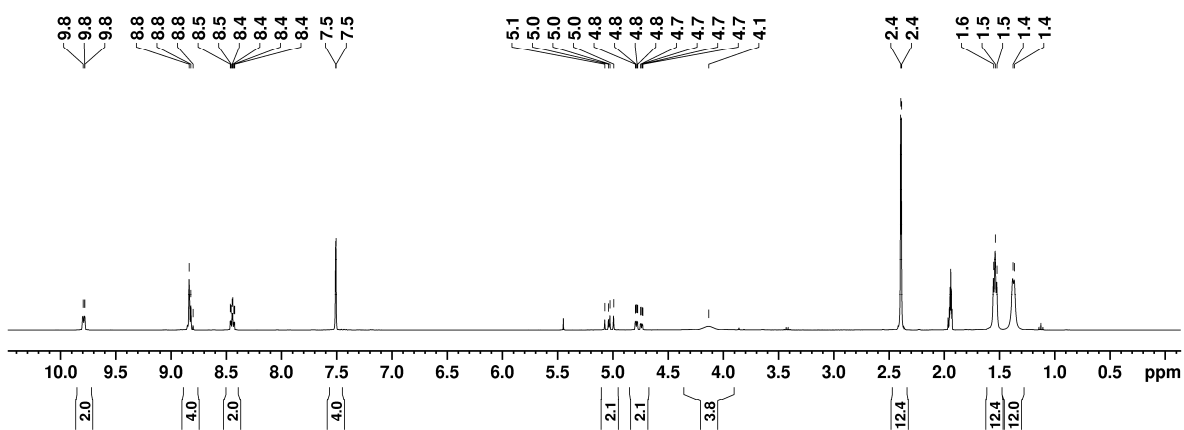

Figure S 31:  $^1\text{H}$  NMR spectrum of  $9\text{f}[\text{OTf}]_4$  in  $\text{CD}_3\text{CN}$ .

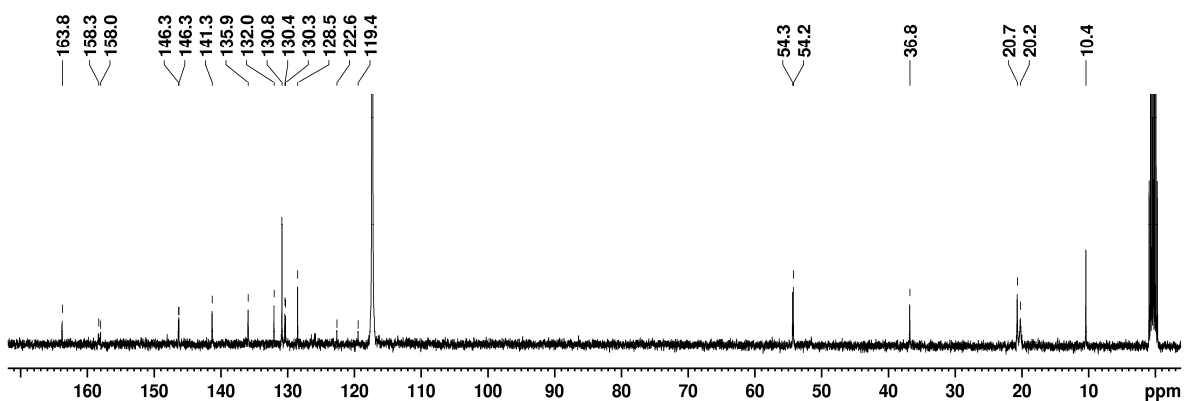

Figure S 32:  $^{13}\text{C}\{^1\text{H}\}$  NMR spectrum of  $9\text{f}[\text{OTf}]_4$  in  $\text{CD}_3\text{CN}$ .

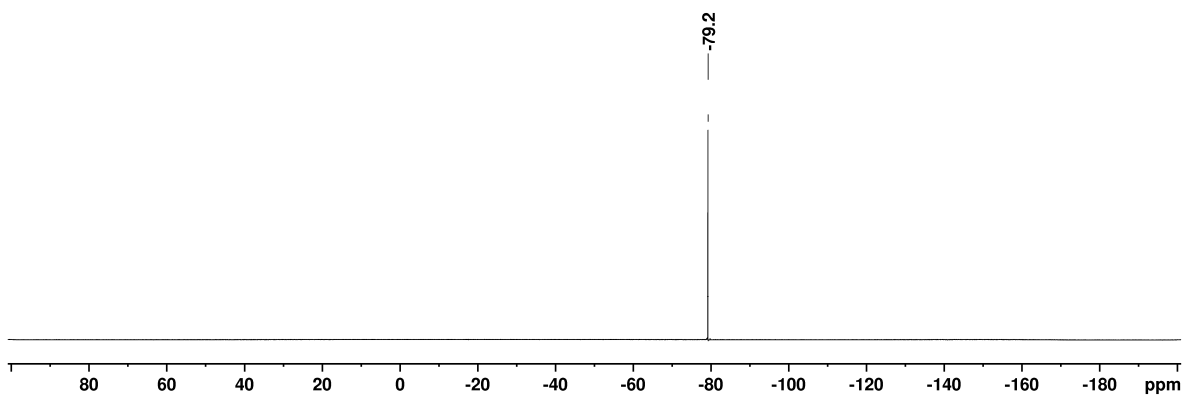

Figure S 33:  $^{19}\text{F}\{^1\text{H}\}$  NMR spectrum of  $9\text{f}[\text{OTf}]_4$  in  $\text{CD}_3\text{CN}$ .

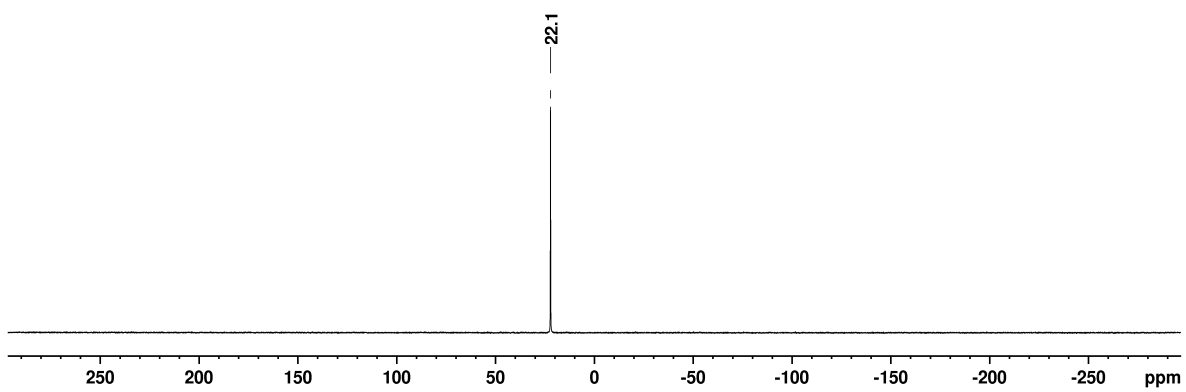

**Figure S 34:**  $^{31}\text{P}\{^1\text{H}\}$  NMR spectrum of **9c**[OTf]<sub>4</sub> in CD<sub>3</sub>CN.

### 2.3.7. Synthesis of **12**[OTf]<sub>2</sub>

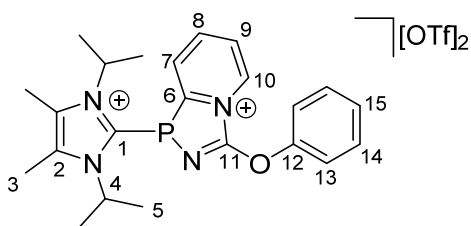

**11**[OTf] (1.000 g, 2.110 mmol, 1.0 equiv.) and silver triflate (542 mg, 2.110 mmol, 1.0 equiv.) are suspended in 10 mL of CH<sub>2</sub>Cl<sub>2</sub> and phenylcyanate (20 % in CH<sub>2</sub>Cl<sub>2</sub>, 1.508 g, 2.532 mmol, 1.2 equiv.) is added. After stirring overnight, the resulting solid is filtered off and the solvent removed *in vacuo*. The remaining solid

is suspended in *n*-pentane and stirred overnight. By filtration and washing with *n*-pentane, **12**[OTf]<sub>2</sub> is obtained as a colourless, air and moisture sensitive solid. Suitable crystals for X-ray diffraction analysis can be obtained by slow diffusion of *n*-pentane to a CH<sub>2</sub>Cl<sub>2</sub> solution at -30 °C.

**Yield:** 1.301 g (87 %); **m.p.** 190 °C (decomp.); **Raman:** No Raman spectrum could be obtained due to strong fluorescence of the sample; **IR** (ATR, 298 K, cm<sup>-1</sup>): 1658 (w), 1601 (vw), 1580 (vw), 1487 (vw), 1419 (vw), 1378 (vw), 1302 (m), 1264 (s), 1247 (vs), 1224 (m), 1152 (s), 1097 (w), 1029 (vs), 925 (w), 903 (vw), 820 (vw), 783 (vw), 765 (m), 734 (w), 686 (w), 672 (vw), 635 (vs), 598 (vw), 573 (w), 548 (vw), 516 (m), 493 (w), 452 (vw); **<sup>1</sup>H NMR** (CD<sub>2</sub>Cl<sub>2</sub>/CD<sub>3</sub>CN, 298 K, in ppm) δ = 1.41 (6H, d, <sup>3</sup>J<sub>HH</sub> = 5.3 Hz, H5), 1.59 (6H, d, <sup>3</sup>J<sub>HH</sub> = 6.8 Hz, H5), 2.40 (6H, s, H3), 4.31 (2H, s(br), H4), 7.45 (1H, m, H15), 7.57 (4H, m, H14/H14), 8.44 (1H, m, H9), 8.84 (1H, m, H8), 9.06 (1H, m, H7), 9.83 (1H, m, H10); **<sup>13</sup>C{<sup>1</sup>H} NMR** (CD<sub>2</sub>Cl<sub>2</sub>/CD<sub>3</sub>CN, 298 K, in ppm): δ = 10.8 (1C, s, C3), 14.9 (1C, s, C3), 20.6 (2C, s, C5), 21.0 (2C, s, C5), 54.7 (2C, s, C4), 120.7 (2C, q, <sup>1</sup>J<sub>CF</sub> = 320 Hz, OTf), 120.7 (2C, s, C13/C14), 128.2 (1C, s, C15), 128.5 (1C, s, C9), 128.5 (1C, d, <sup>1</sup>J<sub>CP</sub> = 64 Hz, C1), 130.4 (2C, s, C13/C14), 131.0 (1C, d, <sup>2</sup>J<sub>CP</sub> = 10 Hz, C7), 135.2 (2C, s, C2), 140.9 (1C, s, C10), 147.1 (1C, d, <sup>3</sup>J<sub>CP</sub> = 6 Hz, C8), 151.5 (1C, s, C11), 152.0 (1C, s, C12), 159.3 (1C, d, <sup>1</sup>J<sub>CP</sub> = 35 Hz, C6); **<sup>19</sup>F{<sup>1</sup>H} NMR** (CD<sub>2</sub>Cl<sub>2</sub>/CD<sub>3</sub>CN, 298 K, in ppm): δ = -79.0 (s); **<sup>31</sup>P{<sup>1</sup>H} NMR** (CD<sub>2</sub>Cl<sub>2</sub>/CD<sub>3</sub>CN, 298 K, in ppm): δ = 14.5 (s); **elemental analysis:** calculated for C<sub>25</sub>H<sub>29</sub>F<sub>6</sub>N<sub>4</sub>O<sub>7</sub>PS<sub>2</sub>: N 7.93, C 42.50, H 4.14, S 9.07; found: N 7.95, C 42.63, H 4.07, S 9.38.

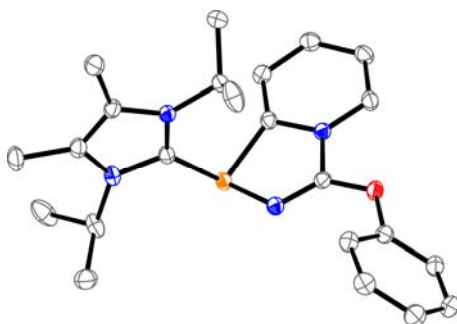

**Figure S 35:** Molecular structure of **12**<sup>2+</sup> in **12**[OTf]<sub>2</sub>; thermal ellipsoids are displayed at 50 % probability level, hydrogen atoms and counterions are omitted for clarity.

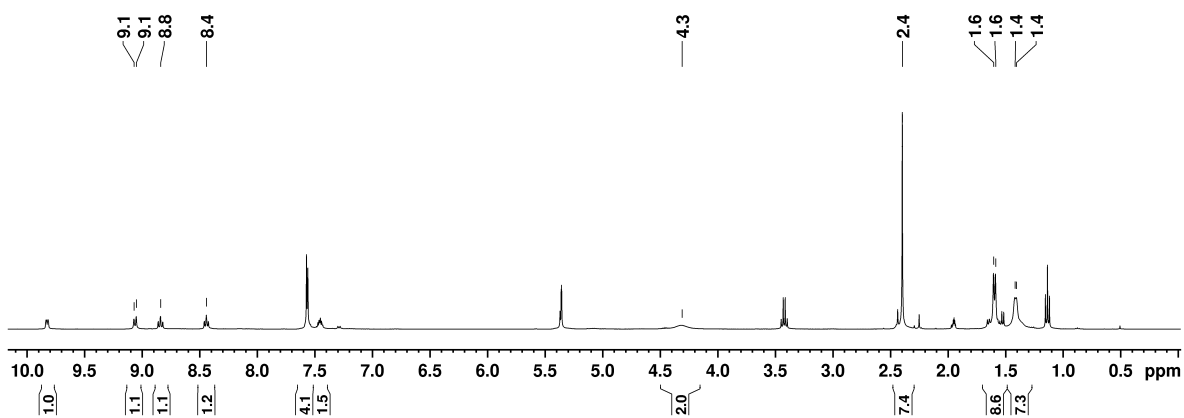

Figure S 36:  $^1\text{H}$  NMR spectrum of  $12[\text{OTf}]_2$  in  $\text{CD}_2\text{Cl}_2/\text{CD}_3\text{CN}$ .

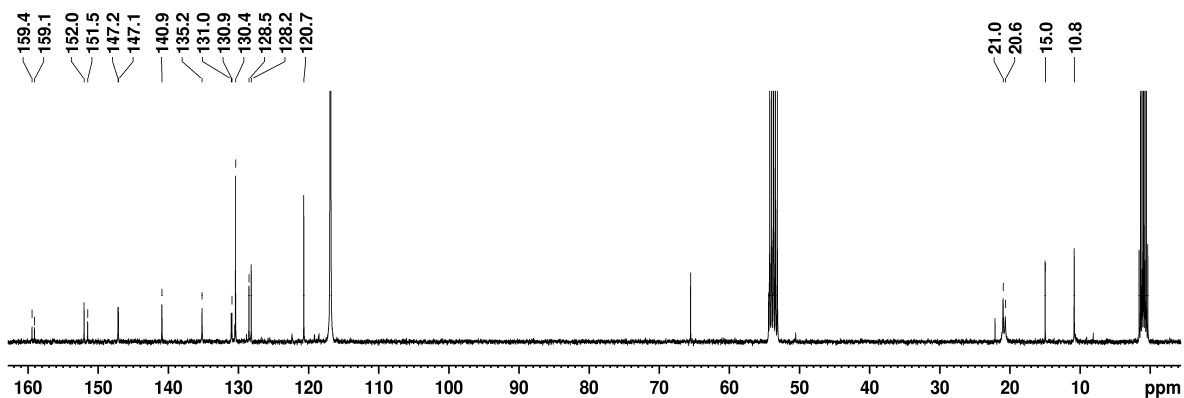

Figure S 37:  $^{13}\text{C}\{^1\text{H}\}$  NMR spectrum of  $12[\text{OTf}]_2$  in  $\text{CD}_2\text{Cl}_2/\text{CD}_3\text{CN}$ .

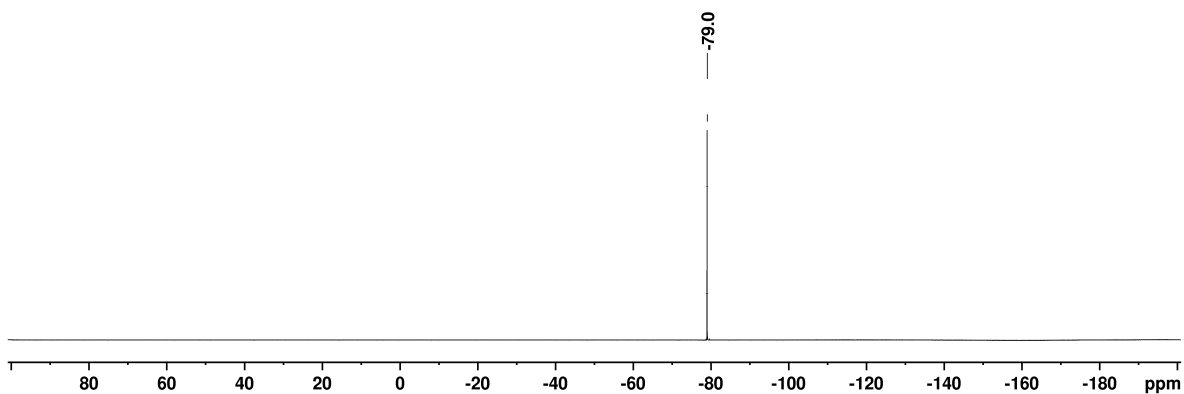

Figure S 38:  $^{19}\text{F}\{^1\text{H}\}$  NMR spectrum of  $12[\text{OTf}]_2$  in  $\text{CD}_2\text{Cl}_2/\text{CD}_3\text{CN}$ .

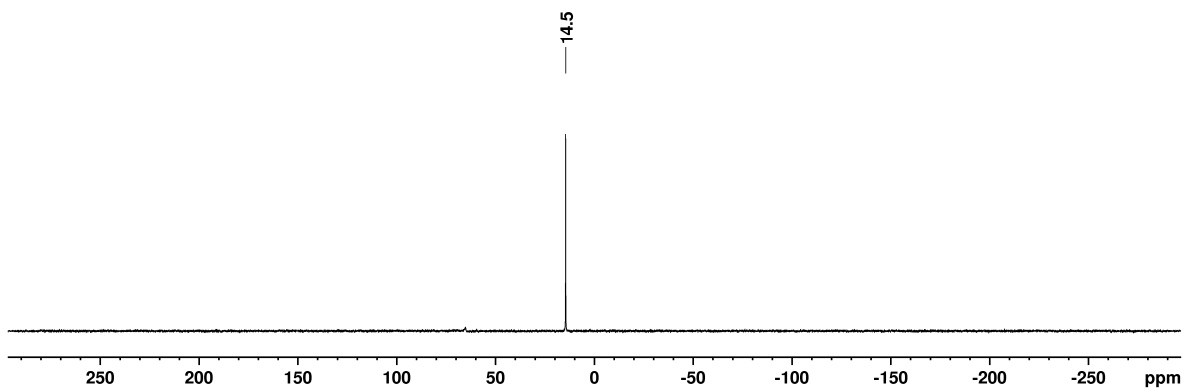

**Figure S 39:**  $^{31}\text{P}\{^1\text{H}\}$  NMR spectrum of  $\mathbf{12}[\text{OTf}]_2$  in  $\text{CD}_2\text{Cl}_2/\text{CD}_3\text{CN}$ .

### 2.3.8. Synthesis of **13**[OTf]<sub>2</sub>

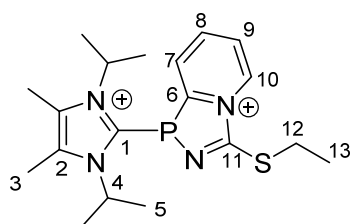

**11**[OTf] (1.000 g, 2.110 mmol, 1.0 equiv.) and silver triflate (542 mg, 2.110 mmol, 1.0 equiv.) are suspended in 10 mL of CH<sub>2</sub>Cl<sub>2</sub> and ethylthiocyanate (220.6 mg, 2.532 mmol, 1.2 equiv.) is added. After stirring overnight, the resulting solid is filtered off and the solvent removed *in vacuo*. The remaining solid is suspended in *n*-pentane

and stirred overnight. By filtration and washing with *n*-pentane, **13**[OTf]<sub>2</sub> is obtained as a green, air and moisture sensitive solid.

**Yield:** 1.210 g (85 %); **m.p.** 82 °C; **Raman** (100 mW, 200 scans, 298 K, cm<sup>-1</sup>): 2989 (6), 2942 (18), 1606 (17), 1579 (7), 1544 (12), 1463 (11), 1405 (8), 1269 (20), 1226 (5), 1123 (9), 1077 (19), 1045 (19), 1034 (31), 887 (6), 756 (11), 707 (5), 574 (8), 547 (5), 349 (15), 313 (16), 80 (100); **IR** (ATR, 298 K, cm<sup>-1</sup>): 1604 (w), 1575 (w), 1542 (w), 1460 (w), 1400 (vw), 1253 (vs), 1222 (s), 1147 (s), 1027 (vs), 979 (m), 788 (w), 754 (w), 724 (w), 635 (vs), 572 (m), 545 (w), 516 (s), 491 (m); **<sup>1</sup>H NMR** (CD<sub>2</sub>Cl<sub>2</sub>, 298 K, in ppm) δ = 1.50 (6H, d, <sup>3</sup>J<sub>HH</sub> = 6.6 Hz, H5), 1.66 (3H, t, <sup>3</sup>J<sub>HH</sub> = 7.4 Hz, H13), 1.67 (6H, d, <sup>3</sup>J<sub>HH</sub> = 6.9 Hz, H5), 2.47 (6H, s, H3), 3.61 (2H, q, <sup>3</sup>J<sub>HH</sub> = 7.4 Hz, H12), 4.28 (2H, s(br), H4), 8.46 (1H, m, H9), 8.77 (1H, m, H8), 9.36 (1H, m, H7), 9.64 (1H, m, H10); **<sup>13</sup>C{<sup>1</sup>H} NMR** (CD<sub>2</sub>Cl<sub>2</sub>, 298 K, in ppm): δ = 11.0 (2C, s, C3), 13.6 (1C, s, C13), 20.9 (2C, s, C5), 21.2 (2C, s, C5), 29.4 (1C, s, C12), 54.5 (1C, s, C4), 54.6 (1C, s, C4), 120.6 (2C, q, <sup>1</sup>J<sub>CF</sub> = 321 Hz, CF3), 129.0 (1C, s, C9), 131.8 (1C, d, <sup>2</sup>J<sub>CP</sub> = 11 Hz, C7), 134.9 (2C, s, C2), 136.7 (1C, d, <sup>1</sup>J<sub>CP</sub> = 66 Hz, C1), 140.6 (1C, d, <sup>3</sup>J<sub>CP</sub> = 3 Hz, C10), 146.2 (1C, d, <sup>3</sup>J<sub>CP</sub> = 6 Hz, C8), 157.9 (1C, d, <sup>1</sup>J<sub>CP</sub> = 35 Hz, C6), 162.8 (1C, d, <sup>3</sup>J<sub>CP</sub> = 6 Hz, C11); **<sup>19</sup>F{<sup>1</sup>H} NMR** (CD<sub>2</sub>Cl<sub>2</sub>, 298 K, in ppm): δ = -78.8 (s); **<sup>31</sup>P{<sup>1</sup>H} NMR** (CD<sub>2</sub>Cl<sub>2</sub>, 298 K, in ppm): δ = 27.9 (s); **elemental analysis:** calculated for C<sub>21</sub>H<sub>29</sub>F<sub>6</sub>N<sub>4</sub>O<sub>6</sub>PS<sub>3</sub>: N 8.31, C 37.39, H 4.33, S 14.26; found: N 8.27, C 37.38, H 4.20, S 14.26.

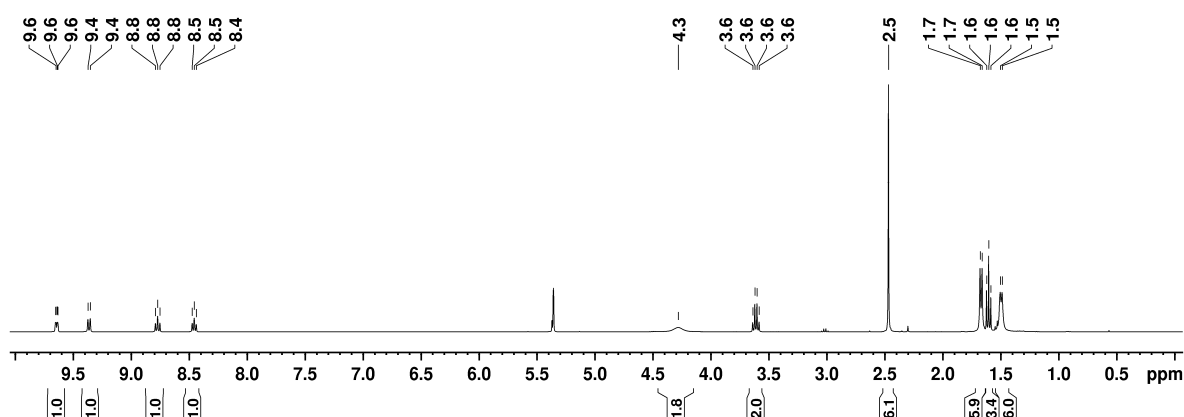

**Figure S 40:** <sup>1</sup>H NMR spectrum of **13**[OTf]<sub>2</sub> in CD<sub>2</sub>Cl<sub>2</sub>.

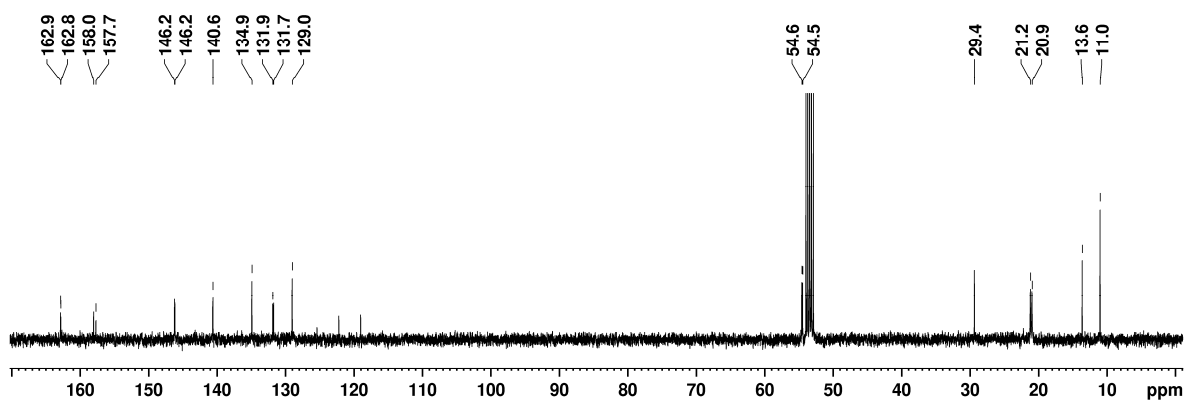

Figure S 41:  $^{13}\text{C}\{^1\text{H}\}$  NMR spectrum of  $^{13}\text{[OTf]}_2$  in  $\text{CD}_2\text{Cl}_2$ .

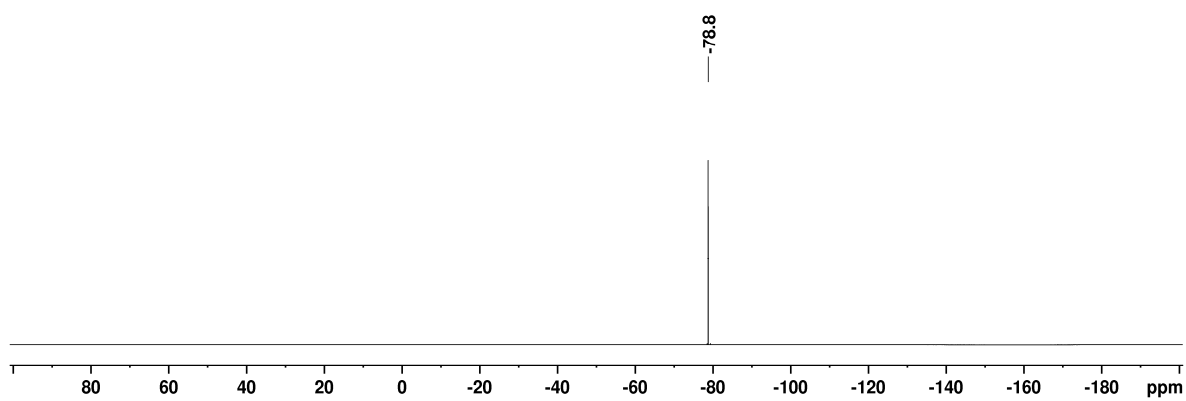

Figure S 42:  $^{19}\text{F}\{^1\text{H}\}$  NMR spectrum of  $^{13}\text{[OTf]}_2$  in  $\text{CD}_2\text{Cl}_2$ .

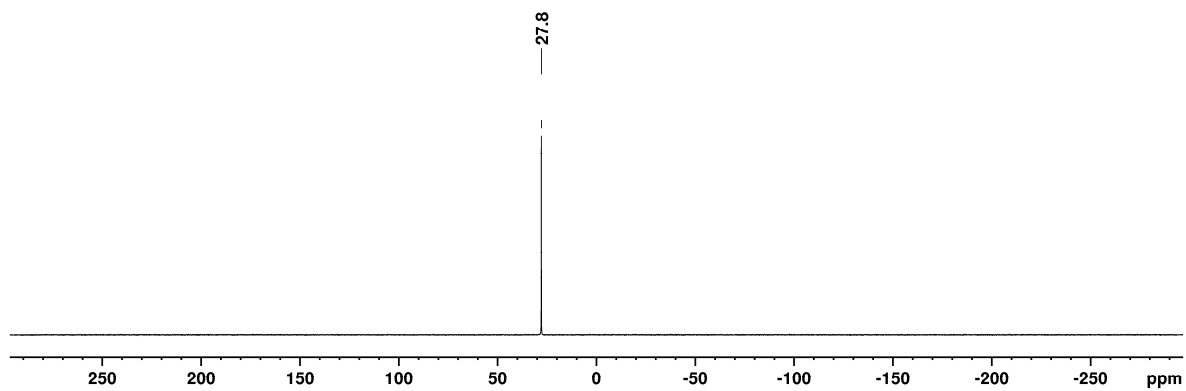

Figure S 43:  $^{31}\text{P}\{^1\text{H}\}$  NMR spectrum of  $^{13}\text{[OTf]}_2$  in  $\text{CD}_2\text{Cl}_2$ .



## 2.4. Chemical Reductions towards Diazaphospholes

### 2.4.1. Synthesis of **14** by reduction of **9a**[OTf]<sub>2</sub>

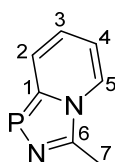

**9a**[OTf]<sub>2</sub> (1.1 g, 1.750 mmol, 1.0 equiv.) and KC<sub>8</sub> (521 mg, 3.854 mmol, 2.2 equiv) are cooled to -78 °C and cold THF (-78 °C, 25 mL) is added. The solution is slowly thawed to room temperature overnight. The solvent is removed *in vacuo* and the residue is taken up in CH<sub>2</sub>Cl<sub>2</sub>/Et<sub>2</sub>O 1:1 (25 mL). After filtration over silica (~6 cm; 1.5 cm Ø) with CH<sub>2</sub>Cl<sub>2</sub>/Et<sub>2</sub>O 1:1 as eluent and subsequent removal of the solvent *in vacuo*, **14** is obtained as a yellow crystalline air sensitive solid.

**Yield:** 164 mg (62 %); **m.p.** 72 °C; **T<sub>95</sub>:** 130°C; **Raman:** No Raman spectrum of the sample could be obtained due to strong fluorescence of the sample; **IR** (ATR, 298 K, cm<sup>-1</sup>): 1617 (m), 1518 (m), 1491 (m), 1449 (m), 1433 (m), 1413 (m), 1377 (m), 1314 (m), 1300 (s), 1260 (m), 1160 (m), 1062 (m), 1010 (m), 825 (s), 739 (vs), 702 (s), 603 (s), 574 (m), 525 (m), 515 (m), 496 (s), 409 (s); **<sup>1</sup>H NMR** (CD<sub>2</sub>Cl<sub>2</sub>, 298 K, in ppm) δ = 2.77 (3H, s, H7), 6.81 (2H, m, H3/H4), 7.99 (1H, m, H2), 8.11 (1H, m, H5); **<sup>13</sup>C{<sup>1</sup>H} NMR** (CD<sub>2</sub>Cl<sub>2</sub>, 298 K, in ppm): δ = 16.7 (1C, d, <sup>3</sup>J<sub>CP</sub> = 3 Hz, C7), 114.4 (1C, d, <sup>4</sup>J<sub>CP</sub> = 2 Hz, C4), 118.2 (1C, d, <sup>3</sup>J<sub>CP</sub> = 17 Hz, C3), 124.6 (1C, d, <sup>2</sup>J<sub>CP</sub> = 10 Hz, C2), 126.0 (1C, s, C5), 145.2 (1C, d, <sup>2</sup>J<sub>CP</sub> = 14 Hz, C6), 168.7 (1C, d, <sup>1</sup>J<sub>CP</sub> = 65 Hz, C1); **<sup>31</sup>P{<sup>1</sup>H} NMR** (CD<sub>2</sub>Cl<sub>2</sub>, 298 K, in ppm): δ = 150.4 (s); **elemental analysis:** calculated for C<sub>7</sub>H<sub>7</sub>N<sub>2</sub>P: N 18.66, C 56.01, H 4.70; found: N 18.38, C 56.04, H 4.31.

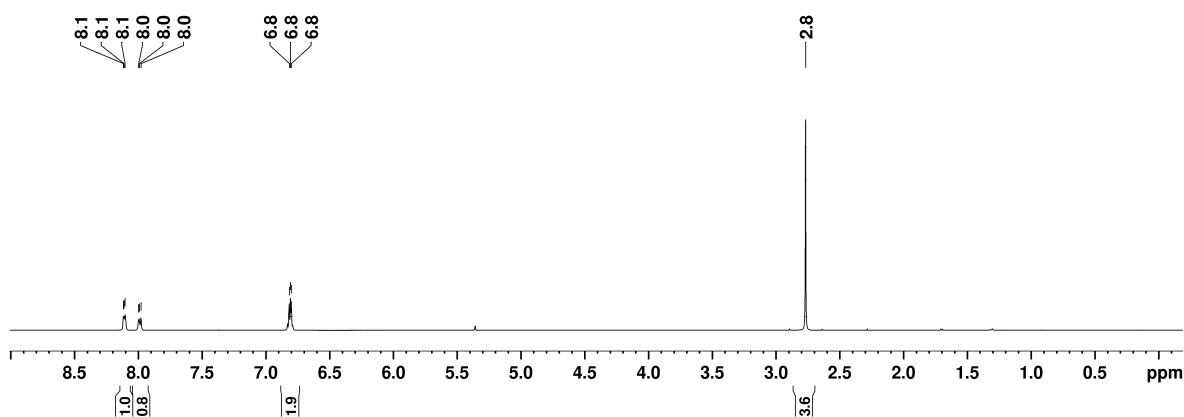

**Figure S 44:** <sup>1</sup>H NMR spectrum of **14** in CD<sub>2</sub>Cl<sub>2</sub>.

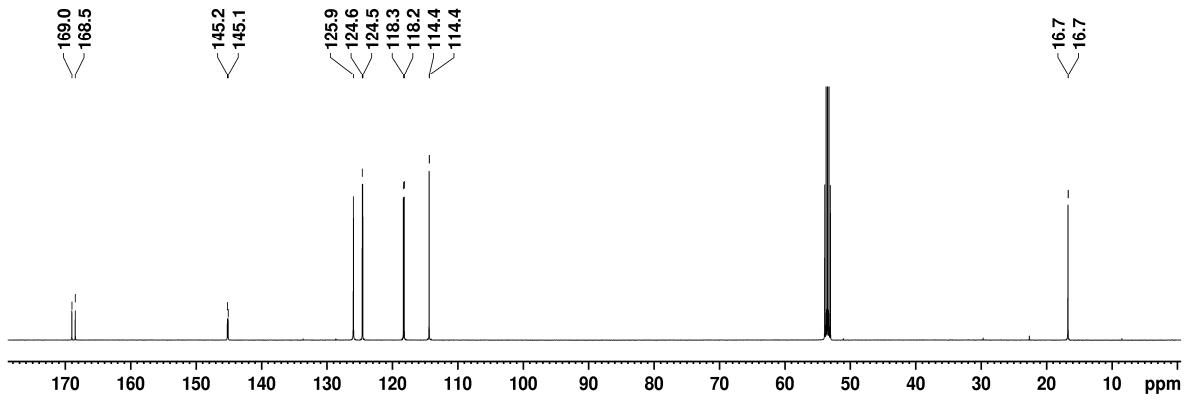

**Figure S 45:**  $^{13}\text{C}\{^1\text{H}\}$  NMR spectrum of **14** in  $\text{CD}_2\text{Cl}_2$ .

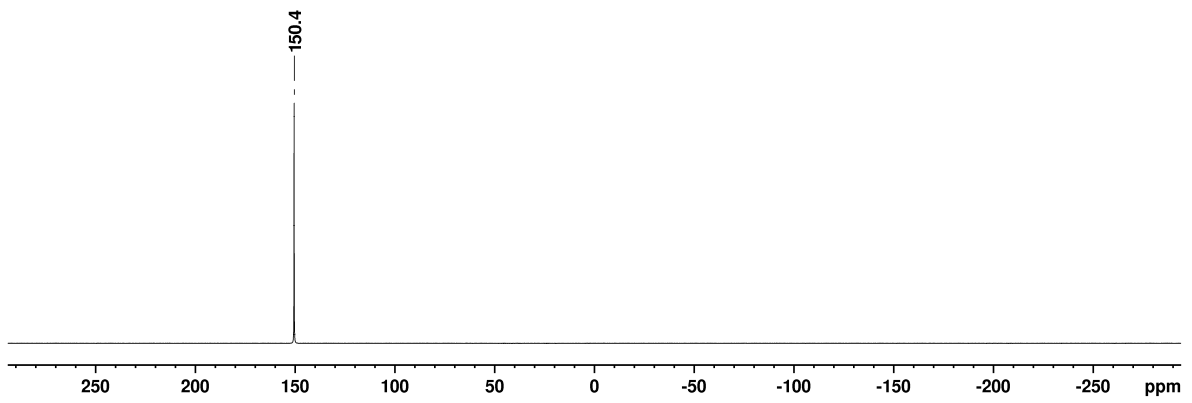

**Figure S 46:**  $^{31}\text{P}\{^1\text{H}\}$  NMR spectrum of **14** in  $\text{CD}_2\text{Cl}_2$ .

### 2.4.2. Synthesis of **16** by reduction of **9g**[OTf]<sub>2</sub>

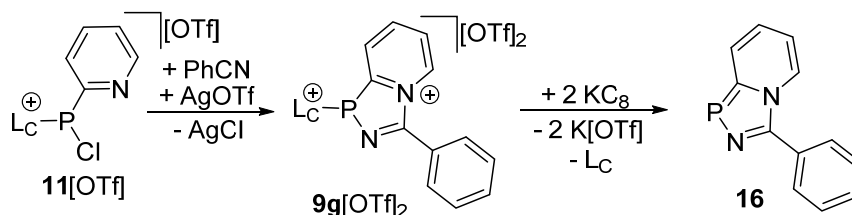

For the synthesis of **16**, the corresponding diazaphospholium salt **9g**[OTf]<sub>2</sub> was synthesized and used without further purification.

**11**[OTf] (1.000 g, 2.110 mmol, 1.0 equiv.) and silver triflate (542 mg, 2.110 mmol, 1.0 equiv.) are suspended in 10 mL of CH<sub>2</sub>Cl<sub>2</sub> and benzonitrile (435 mg, 4.220 mmol, 2.0 equiv.) is added. After stirring overnight, the resulting solid is filtered off and the solvent removed *in vacuo*. The remaining solid is suspended in *n*-pentane/Et<sub>2</sub>O 1:1 and stirred overnight. By filtration and washing with *n*-pentane, **9g**[OTf]<sub>2</sub> is obtained as an orange, air and moisture sensitive solid, which was used without further purification.

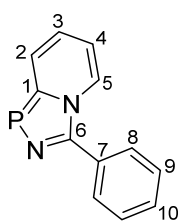

**9g**[OTf]<sub>2</sub> (1.187 g, 1.719 mmol, 1.0 equiv.) and KC<sub>8</sub> (456 mg, 3.438 mmol, 2.0 equiv) are cooled to -78 °C and cold THF (-78 °C, 35 mL) is added. The solution is slowly thawed to room temperature overnight. The solvent is removed *in vacuo* and the residue is taken up in CH<sub>2</sub>Cl<sub>2</sub>/Et<sub>2</sub>O 1:1 (25 mL). After filtration over silica (~6 cm; 1.5 cm Ø) with CH<sub>2</sub>Cl<sub>2</sub>/Et<sub>2</sub>O 1:1 as eluent and subsequent removal of the solvent *in vacuo*, **16** is obtained as a yellow crystalline air sensitive solid. Suitable crystals for X-ray diffraction analysis can be obtained by cooling a saturated *n*-pentane solution of **16** to -30 °C.

**Yield:** 163 mg (45 %); **m.p.** 111 °C; **T<sub>95</sub>:** 177 °C; **Raman:** No Raman spectrum of the sample could be obtained due to strong fluorescence of the sample; **IR** (ATR, 298 K, cm<sup>-1</sup>): 1616 (w), 1510 (m), 1463 (w), 1438 (m), 1409 (w), 1319 (m), 1296 (m), 1264 (w), 1182 (m), 1169 (w), 1123 (m), 1072 (w), 1063 (m), 1008 (m), 954 (m), 936 (w), 924 (w), 824 (m), 767 (s), 745 (vs), 724 (m), 712 (s), 698 (vs), 650 (s), 615 (m), 575 (m), 516 (m), 496 (s), 480 (s), 418 (s); **<sup>1</sup>H NMR** (CD<sub>2</sub>Cl<sub>2</sub>, 298 K, in ppm) δ = 6.72 (1H, t, <sup>3</sup>J<sub>HH</sub> = 7.1 Hz, H4), 6.85 (1H, dd, <sup>3</sup>J<sub>HH</sub> = 6.4 Hz, <sup>3</sup>J<sub>HH</sub> = 8.9 Hz, H3), 7.58 (3H, m, H9/H10), 7.74 (2H, m, H8), 8.05 (1H, dd, <sup>3</sup>J<sub>HH</sub> = 8.9 Hz, <sup>4</sup>J<sub>HH</sub> = 1.0 Hz, H2), 8.51 (1H, m, H5); **<sup>13</sup>C{<sup>1</sup>H} NMR** (CD<sub>2</sub>Cl<sub>2</sub>, 298 K, in ppm): δ = 114.6 (1C, d, <sup>4</sup>J<sub>CP</sub> = 2 Hz, C4), 119.2 (1C, d, <sup>3</sup>J<sub>CP</sub> = 17 Hz, C3), 124.6 (1C, d, <sup>2</sup>J<sub>CP</sub> = 10 Hz, C2), 126.8 (1C, s, C5), 128.9 (4C, s, C8), 129.5 (1C, s, C9), 132.2 (1C, d, <sup>3</sup>J<sub>CP</sub> = 4 Hz, C7), 147.8 (1C, d, <sup>2</sup>J<sub>CP</sub> = 13 Hz, C6), 169.4 (1C, d, <sup>1</sup>J<sub>CP</sub> = 67 Hz, C1); **<sup>31</sup>P{<sup>1</sup>H} NMR** (CD<sub>2</sub>Cl<sub>2</sub>, 298 K, in ppm): δ = 155.1 (s); **elemental analysis:** calculated for C<sub>12</sub>H<sub>9</sub>N<sub>2</sub>P: N 13.20, C 67.93, H 4.28; found: N 13.19, C 67.70, H 3.93.

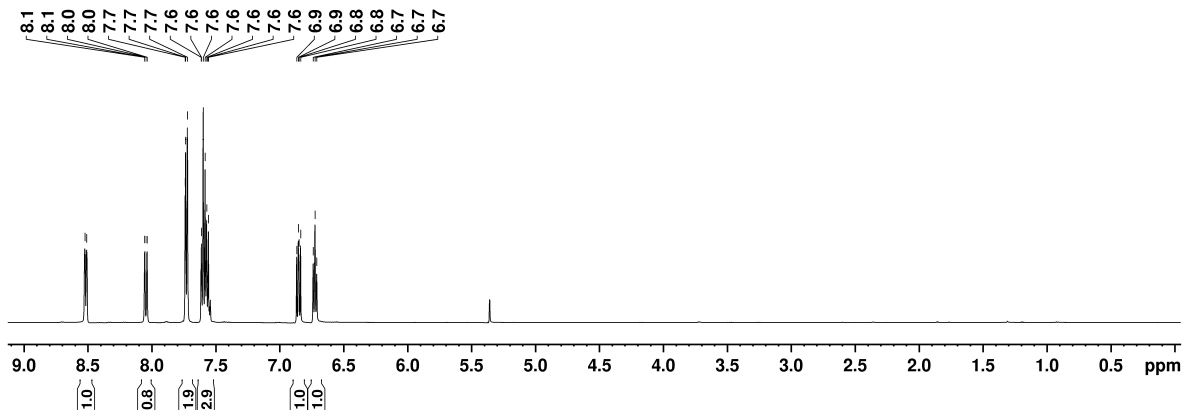

Figure S 47:  $^1\text{H}$  NMR spectrum of **16** in  $\text{CD}_2\text{Cl}_2$ .

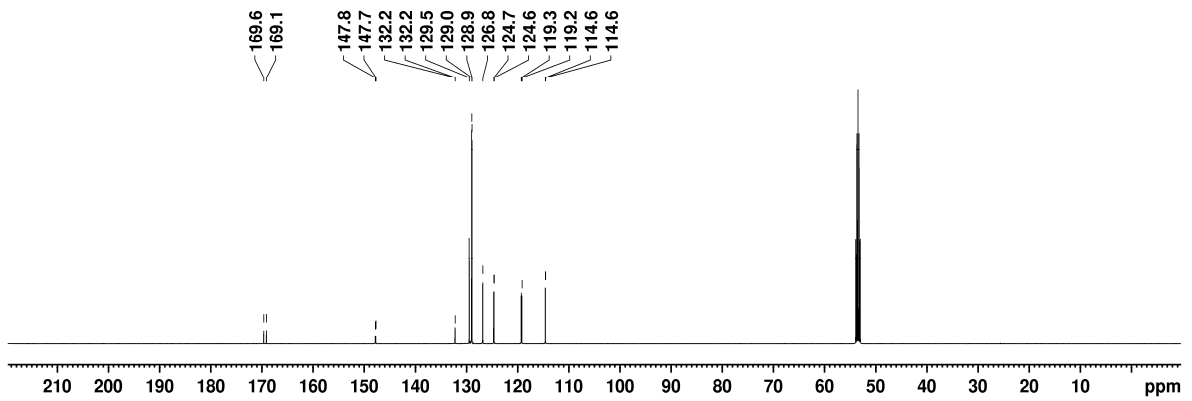

Figure S 48:  $^{13}\text{C}\{^1\text{H}\}$  NMR spectrum of **16** in  $\text{CD}_2\text{Cl}_2$ .

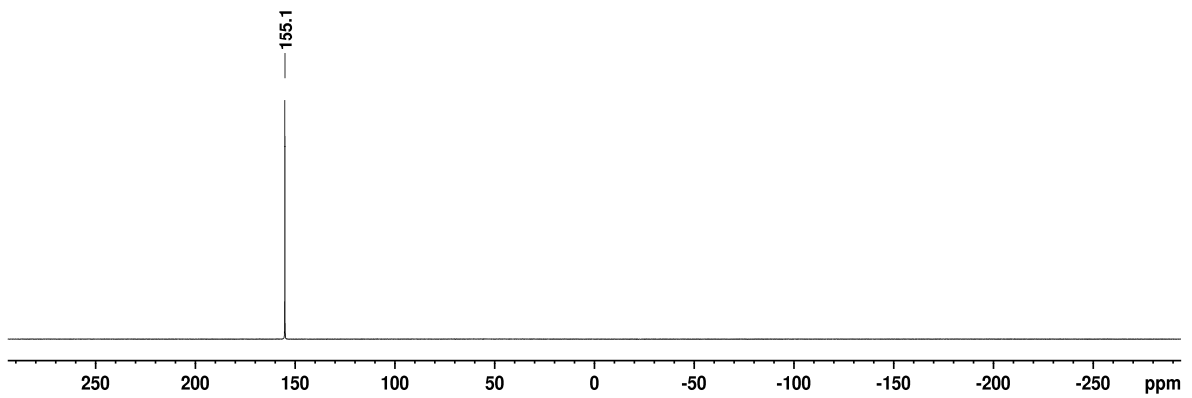

Figure S 49:  $^{31}\text{P}\{^1\text{H}\}$  NMR spectrum of **16** in  $\text{CD}_2\text{Cl}_2$ .

### 2.4.3. Synthesis of **17** by reduction of **30**[OTf]<sub>2</sub>

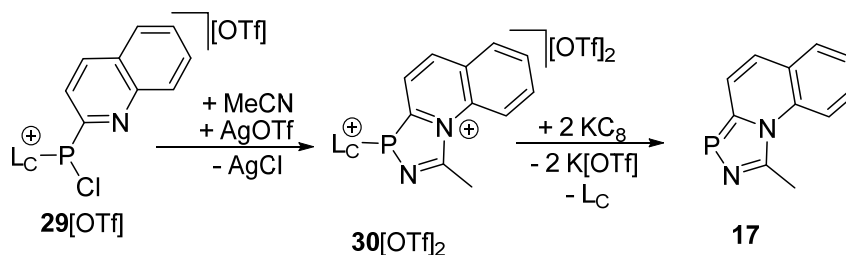

For the synthesis of **17**, the corresponding diazaphospholium salt **31**[OTf]<sub>2</sub> was synthesized and used without further purification.

**30**[OTf] (1.500 g, 2.863 mmol, 1.0 equiv.) and silver triflate (736 mg, 2.863 mmol, 1.0 equiv.) are suspended in 10 mL of CH<sub>2</sub>Cl<sub>2</sub> and after 5 min 5 mL of MeCN are added. After stirring for three days at room temperature, the resulting solid is filtered off and the solvent removed *in vacuo*. The remaining solid is suspended in Et<sub>2</sub>O and stirred for 30 min. By filtration and washing with Et<sub>2</sub>O, **31**[OTf]<sub>2</sub> is obtained as colorless, air and moisture sensitive solid, which was used without further purification.

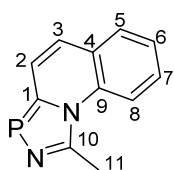

**31**[OTf]<sub>2</sub> (1.88 g, 2.77 mmol, 1.0 equiv.) and KC<sub>8</sub> (768 mg, 5.679 mmol, 2.05 equiv) are cooled to -78 °C and cold THF (-78 °C, 40 mL) is added. The solution is slowly thawed to room temperature overnight. The solvent is removed *in vacuo* and the residue is taken up in CH<sub>2</sub>Cl<sub>2</sub>/Et<sub>2</sub>O 1:1 (25 mL). After filtration over silica (~6 cm; 1.5 cm Ø) with CH<sub>2</sub>Cl<sub>2</sub>/Et<sub>2</sub>O 1:1 as eluent and subsequent removal of the solvent *in vacuo*, **17** is obtained as a yellow crystalline air sensitive solid.

**Yield:** 238 mg (43 %); **m.p.** n.d.; **T<sub>95</sub>:** n.d.; **Raman:** No Raman spectrum of the sample could be obtained due to strong fluorescence of the sample; **IR** (ATR, 298 K, cm<sup>-1</sup>): 1603 (m), 1556 (m), 1483 (m), 1445 (m), 1435 (s), 1370 (m), 1322 (s), 1299 (s), 1228 (m), 1215 (s), 1173 (m), 1137 (m), 1102 (s), 1030 (m), 987 (m), 937 (m), 847 (s), 823 (s), 785 (vs), 753 (vs), 689 (s), 660 (m), 592 (m), 584 (m), 557 (m), 522 (m), 493 (vs); **<sup>1</sup>H NMR** (CD<sub>2</sub>Cl<sub>2</sub>, 298 K, in ppm) δ = 3.24 (3H, s, H11), 7.03 (1H, d, <sup>3</sup>J<sub>HH</sub> = 9.1 Hz, H3), 7.51 (1H, m, H6), 7.59 (1H, m, H7), 7.74 (2H, m, H2/H5), 8.42 (1H, d, <sup>3</sup>J<sub>HH</sub> = 8.7 Hz, H8); **<sup>13</sup>C{<sup>1</sup>H} NMR** (CD<sub>2</sub>Cl<sub>2</sub>, 298 K, in ppm): δ = 24.6 (1C, d, <sup>3</sup>J<sub>CP</sub> = 5 Hz, C11), 117.5 (1C, s, C8), 120.6 (1C, d, <sup>3</sup>J<sub>CP</sub> = 20 Hz, C3), 121.8 (1C, d, <sup>2</sup>J<sub>CP</sub> = 14 Hz, C2), 125.8 (1C, s, C6), 127.0 (1C, d, <sup>3</sup>J<sub>CP</sub> = 3 Hz, C9), 127.7 (1C, d, <sup>5</sup>J<sub>CP</sub> = 2 Hz, C7), 128.6 (1C, d, <sup>5</sup>J<sub>CP</sub> = 2 Hz, C5), 135.9 (1C, s, C4), 150.6 (1C, d, <sup>2</sup>J<sub>CP</sub> = 15 Hz, C10), 170.3 (1C, d, <sup>1</sup>J<sub>CP</sub> = 58 Hz, C1); **<sup>31</sup>P{<sup>1</sup>H} NMR** (CD<sub>2</sub>Cl<sub>2</sub>, 298 K, in ppm): δ = 155.5 (s); **elemental analysis:** calculated for C<sub>11</sub>H<sub>9</sub>N<sub>2</sub>P: N 13.99, C 66.00, H 4.53; found: N 14.03, C 65.88, H 4.30

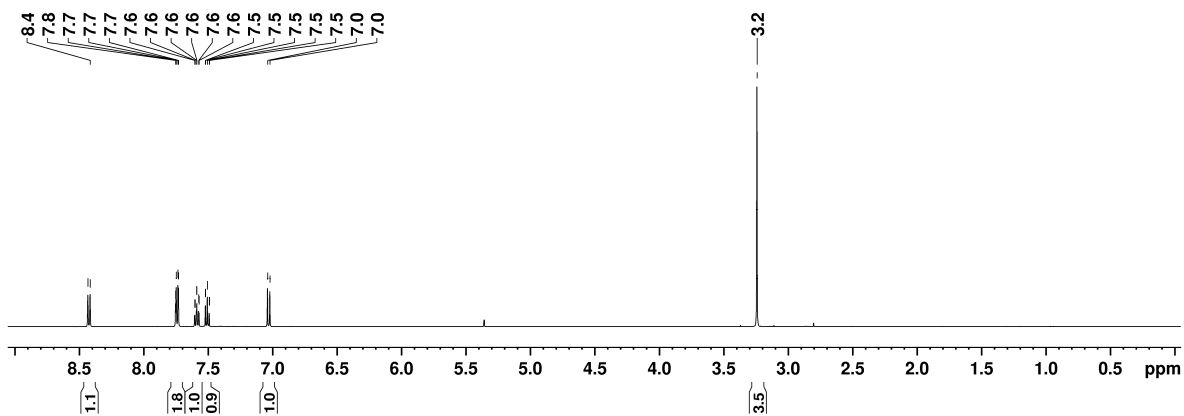

Figure S 50:  $^1\text{H}$  NMR spectrum of **17** in  $\text{CD}_2\text{Cl}_2$ .

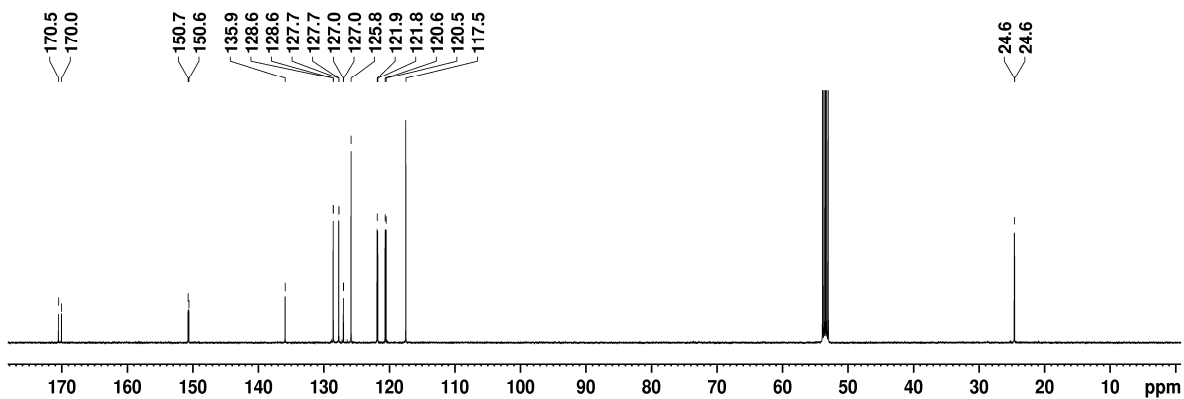

Figure S 51:  $^{13}\text{C}\{^1\text{H}\}$  NMR spectrum of **17** in  $\text{CD}_2\text{Cl}_2$ .

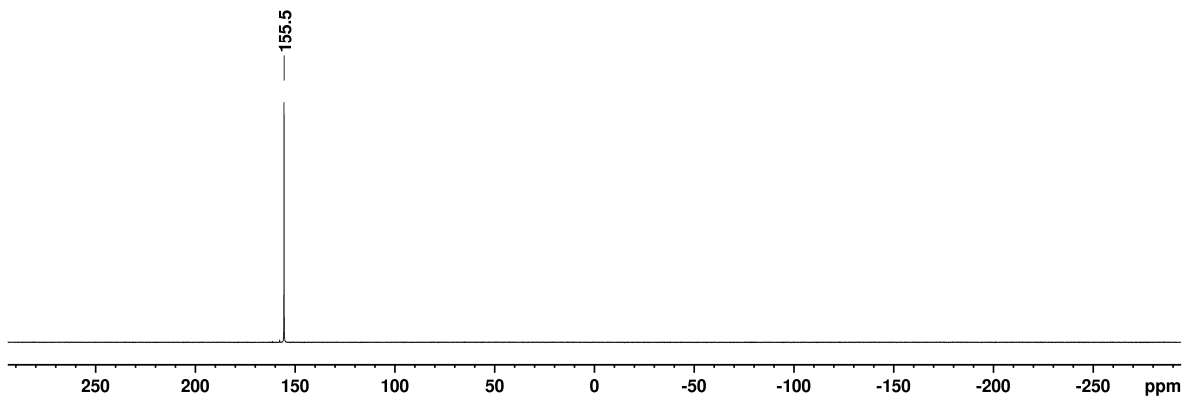

Figure S 52:  $^{31}\text{P}\{^1\text{H}\}$  NMR spectrum of **17** in  $\text{CD}_2\text{Cl}_2$ .

## 2.5. Cycloaddition Reactions of 6[OTf] with other Dipolarophiles

### 2.5.1. Synthesis of 18a[OTf]<sub>2</sub>

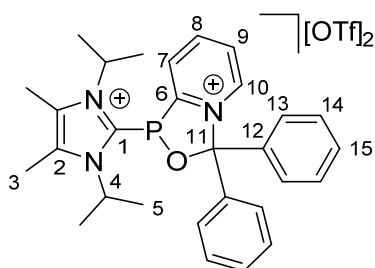

**11[OTf]** (300.0 mg, 0.630 mmol, 1.0 equiv.), silver triflate (162.6 mg, 0.630 mmol, 1.0 equiv.) and benzophenone (127.0 mg, 0.697 mmol, 1.1 equiv.) are suspended in 10 mL of CH<sub>2</sub>Cl<sub>2</sub> and stirred for 6 h. The resulting solid is filtered off and the solvent removed *in vacuo*. The remaining solid is suspended in *n*-pentane and stirred overnight. By filtration and washing with *n*-pentane, **18a[OTf]<sub>2</sub>** is obtained as a colourless, air and moisture sensitive solid. Suitable crystals for X-ray diffraction analysis can be obtained by slow diffusion of *n*-pentane to a CH<sub>2</sub>Cl<sub>2</sub> solution at -30°C.

**Yield:** 368 mg (76 %); **m.p.** 182 °C (decomp.); **Raman** (100 mW, 200 scans, 298 K, cm<sup>-1</sup>): 3074 (14), 2989 (8), 2948 (14), 1600 (22), 1567 (6), 1450 (7), 1404 (6), 1271 (15), 1225 (5), 1189 (7), 1153 (6), 1088 (5), 1033 (37), 1003 (25), 886 (5), 756 (13), 700 (12), 618 (9), 575 (14), 349 (30), 313 (32), 286 (28), 87 (100); **IR** (ATR, 298 K, cm<sup>-1</sup>): 1598 (vw), 1470 (w), 1450 (w), 1399 (vw), 1257 (s), 1221 (s), 1146 (s), 1027 (s), 900 (w), 786 (w), 753 (m), 697 (m), 634 (vs), 572 (m), 516 (s); **<sup>1</sup>H NMR** (CD<sub>2</sub>Cl<sub>2</sub>, 298 K, in ppm) δ = 1.37 (6H, d, <sup>3</sup>J<sub>HH</sub> = 6.9 Hz, H5), 1.56 (6H, d, <sup>3</sup>J<sub>HH</sub> = 6.9 Hz, H5), 2.37 (6H, s, H3), 4.76 (2H, m, H4), 7.18 (2H, m, H13), 7.44 (2H, m, H13), 7.50 (6H, m, H14/H15), 8.57 (1H, m, H9), 8.81 (1H, m, H8), 9.15 (1H, d, <sup>3</sup>J<sub>HH</sub> = 6.1 Hz, H10), 9.40 (1H, d, <sup>3</sup>J<sub>HH</sub> = 7.4 Hz, H7); **<sup>13</sup>C{<sup>1</sup>H} NMR** (CD<sub>2</sub>Cl<sub>2</sub>, 298 K, in ppm): δ = 10.9 (4C, s, C5), 20.9 (1C, s, C3), 21.0 (1C, s, C3), 54.3 (1C, s, C4), 54.4 (1C, s, C4), 114.1 (1C, d, <sup>2</sup>J<sub>CP</sub> = 13 Hz, C11), 120.6 (2C, q, <sup>1</sup>J<sub>CF</sub> = 321 Hz, CF3), 127.1 (1C, s, C13), 128.3 (1C, s, C13), 129.7 (2C, s, C14/15), 129.9 (2C, s, C14/15), 131.4 (1C, s, C9), 131.7 (1C, s, C14/15), 132.1 (1C, s, C14/15), 132.6 (2C, s, C2), 133.1 (1C, d, <sup>3</sup>J<sub>CP</sub> = 1 Hz, C12), 133.3 (1C, d, <sup>2</sup>J<sub>CP</sub> = 15 Hz, C7), 136.2 (1C, d, <sup>3</sup>J<sub>CP</sub> = 4 Hz, C12), 139.3 (1C, d, <sup>1</sup>J<sub>CP</sub> = 103 Hz, C1), 144.4 (1C, s, C10), 147.1 (1C, d, <sup>3</sup>J<sub>CP</sub> = 2 Hz, C8), 150.1 (1C, d, <sup>1</sup>J<sub>CP</sub> = 49 Hz, C6); **<sup>19</sup>F{<sup>1</sup>H} NMR** (CD<sub>2</sub>Cl<sub>2</sub>, 298 K, in ppm): δ = -78.8 (s); **<sup>31</sup>P{<sup>1</sup>H} NMR** (CD<sub>2</sub>Cl<sub>2</sub>, 298 K, in ppm): δ = 65.8 (s); **elemental analysis:** calculated for C<sub>31</sub>H<sub>34</sub>F<sub>6</sub>N<sub>3</sub>O<sub>7</sub>PS<sub>2</sub>·0.25 CH<sub>2</sub>Cl<sub>2</sub>: N 5.31, C 47.46, H 4.40, S 8.11; found: N 5.52, C 47.23, H 4.18, S 8.16.

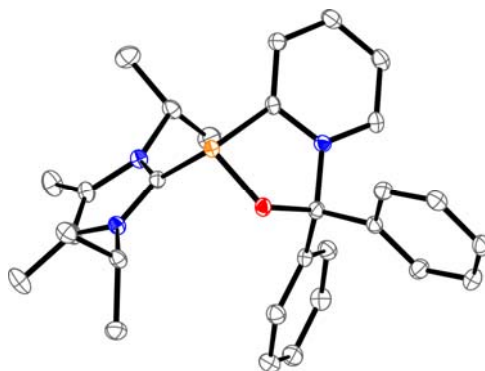

**Figure S 53:** Molecular structure of  $18a^{2+}$  in  $18a[OTf]_2 \cdot CH_2Cl_2$ ; thermal ellipsoids are displayed at 50 % probability level, hydrogen atoms, solvent molecules and counterions are omitted for clarity.

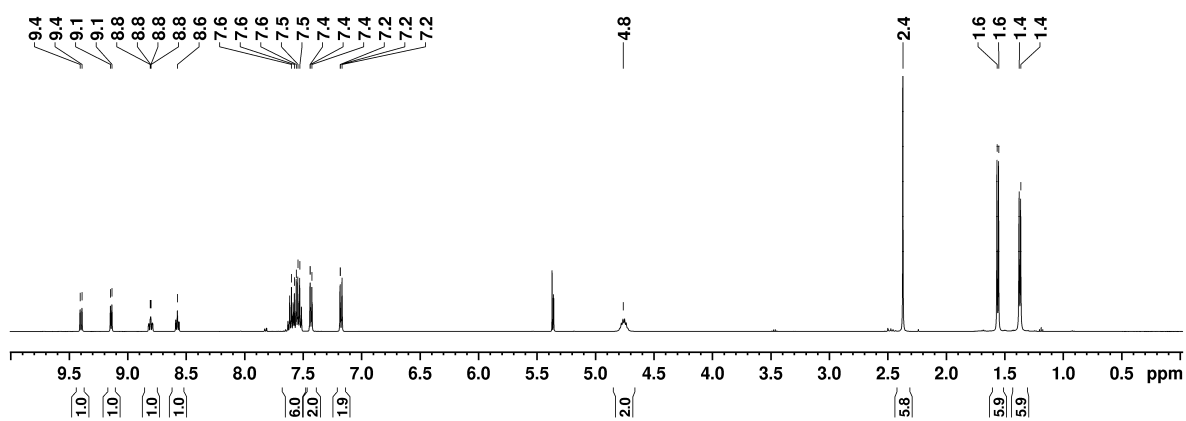

**Figure S 54:**  $^1H$  NMR spectrum of  $18a[OTf]_2$  in  $CD_2Cl_2$ .

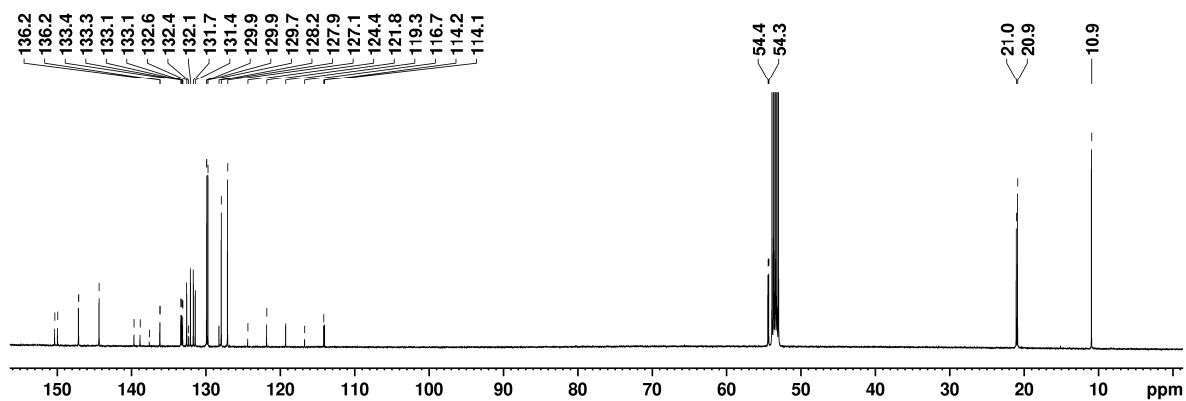

**Figure S 55:**  $^{13}C\{^1H\}$  NMR spectrum of  $18a[OTf]_2$  in  $CD_2Cl_2$ .



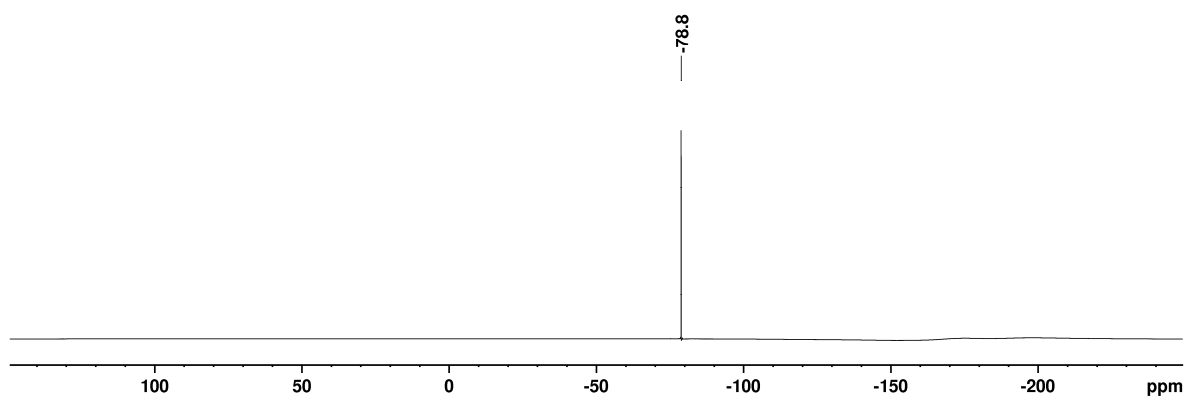

**Figure S 56:**  $^{19}\text{F}\{^1\text{H}\}$  NMR spectrum of **18a**[OTf] $_2$  in  $\text{CD}_2\text{Cl}_2$ .

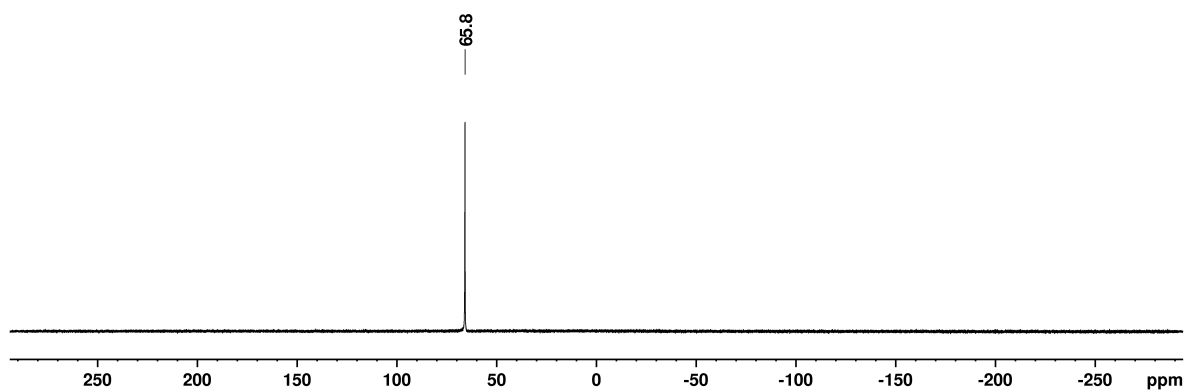

**Figure S 57:**  $^{31}\text{P}\{^1\text{H}\}$  NMR spectrum of **18a**[OTf] $_2$  in  $\text{CD}_2\text{Cl}_2$ .

### 2.5.2. Synthesis of **18b**[OTf]<sub>2</sub>

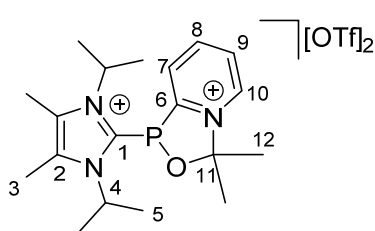

**11**[OTf] (150.0 mg, 0.316 mmol, 1.0 equiv.), silver triflate (85.3 mg, 0.316 mmol, 1.0 equiv.) and acetone (300.0 mg, 5.165 mmol, 16.3 equiv.) are suspended in 6 mL of CH<sub>2</sub>Cl<sub>2</sub> and stirred for 6 h. The resulting solid is filtered off and the solvent removed *in vacuo*. The remaining solid is suspended in *n*-pentane and stirred overnight. By filtration and washing with *n*-pentane, crude **18b**[OTf]<sub>2</sub> is obtained. After several recrystallizations from CH<sub>2</sub>Cl<sub>2</sub>/*n*-pentane **18b**[OTf]<sub>2</sub> was obtained as a colourless, air and moisture sensitive solid.

**Yield:** 52 mg (25 %); **m.p.** 222 °C; **Raman** (80 mW, 100 scans, 298 K, cm<sup>-1</sup>): 3082 (19), 3003 (33), 2993 (33), 2948 (58), 2895 (17), 2886 (17), 1608 (33), 1564 (22), 1469 (28), 1460 (31), 1449 (31), 1438 (28), 1404 (28), 1375 (22), 1280 (53), 1224 (28), 1157 (22), 1145 (19), 1107 (28), 1087 (19), 1034 (100), 988 (19), 890 (25), 755 (42), 701 (31), 574 (33), 538 (25), 515 (25); **IR** (ATR, 298 K, cm<sup>-1</sup>): 1607 (vw), 1400 (vw), 1264 (s), 1248 (s), 1221 (m), 1205 (w), 1156 (m), 1104 (w), 1026 (s), 984 (w), 944 (vw), 857 (w), 787 (w), 777 (w), 755 (vw), 739 (vw), 633 (vs), 573 (w), 537 (vw), 514 (m), 483 (w); **<sup>1</sup>H NMR** (CD<sub>2</sub>Cl<sub>2</sub>, 298 K, in ppm) δ = 1.55 (12H, m, H5), 2.07 (3H, s, H12), 2.14 (3H, s, H12), 2.46 (6H, s, H3), 4.84 (2H, m, H4), 8.45 (1H, m, H9), 8.71 (1H, m, H8), 9.24 (1H, d, <sup>3</sup>J<sub>HH</sub> = 7.9 Hz, H7), 9.81 (1H, d, <sup>3</sup>J<sub>HH</sub> = 6.1 Hz, H10); **<sup>13</sup>C{<sup>1</sup>H} NMR** (CD<sub>2</sub>Cl<sub>2</sub>, 298 K, in ppm): δ = 11.0 (2C, s, C3), 20.9 (4C, s, C5), 27.0 (1C, s, C12), 29.4 (1C, d, <sup>3</sup>J<sub>CP</sub> = 3 Hz, C12), 53.9 (1C, s, C4), 54.0 (1C, s, C4), 111.2 (1C, d, <sup>2</sup>J<sub>CP</sub> = 14 Hz, C11), 120.6 (2C, q, <sup>1</sup>J<sub>CF</sub> = 320 Hz, CF3), 131.3 (1C, s, C9), 132.7 (1C, d, <sup>2</sup>J<sub>CP</sub> = 14 Hz, C7), 132.8 (2C, s, C2), 139.2 (1C, d, <sup>1</sup>J<sub>CP</sub> = 103 Hz, C1), 142.9 (1C, s, C10), 146.2 (1C, d, <sup>3</sup>J<sub>CP</sub> = 1 Hz, C8), 150.1 (1C, d, <sup>1</sup>J<sub>CP</sub> = 49 Hz, C6); **<sup>19</sup>F{<sup>1</sup>H} NMR** (CD<sub>2</sub>Cl<sub>2</sub>, 298 K, in ppm): δ = -78.9 (s); **<sup>31</sup>P{<sup>1</sup>H} NMR** (CD<sub>2</sub>Cl<sub>2</sub>, 298 K, in ppm): δ = 71.8 (s); **elemental analysis:** calculated for C<sub>21</sub>H<sub>30</sub>F<sub>6</sub>N<sub>3</sub>O<sub>7</sub>PS<sub>2</sub>: N 6.51, C 39.07, H 4.68, S 9.93; found: N 6.27, C 38.85, H 4.81, S 10.50.

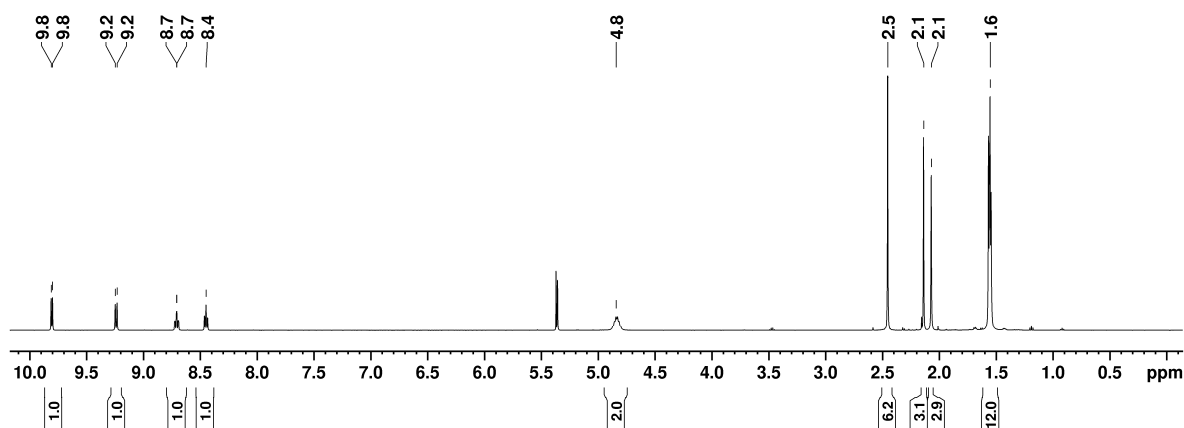

**Figure S 58:** <sup>1</sup>H NMR spectrum of **18b**[OTf]<sub>2</sub> in CD<sub>2</sub>Cl<sub>2</sub>.

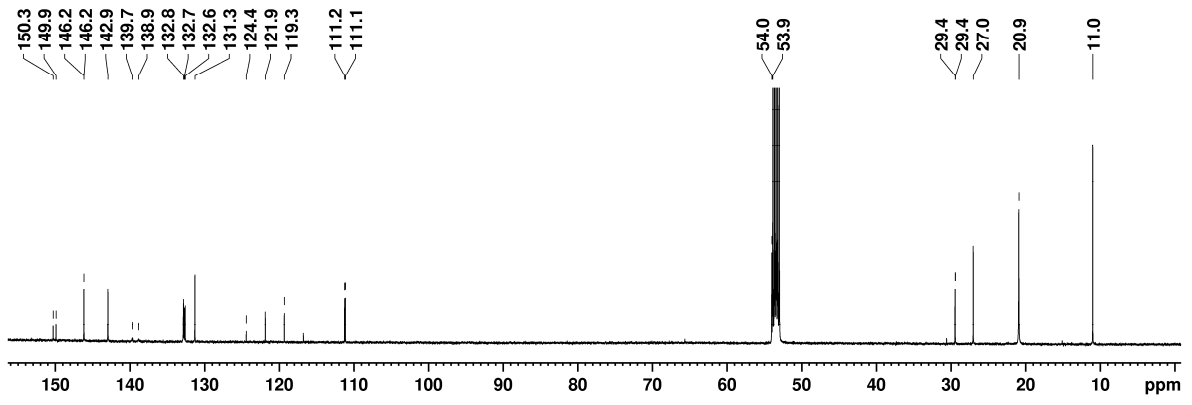

Figure S 59:  $^{13}\text{C}\{^1\text{H}\}$  NMR spectrum of **18b**[OTf]<sub>2</sub> in CD<sub>2</sub>Cl<sub>2</sub>.

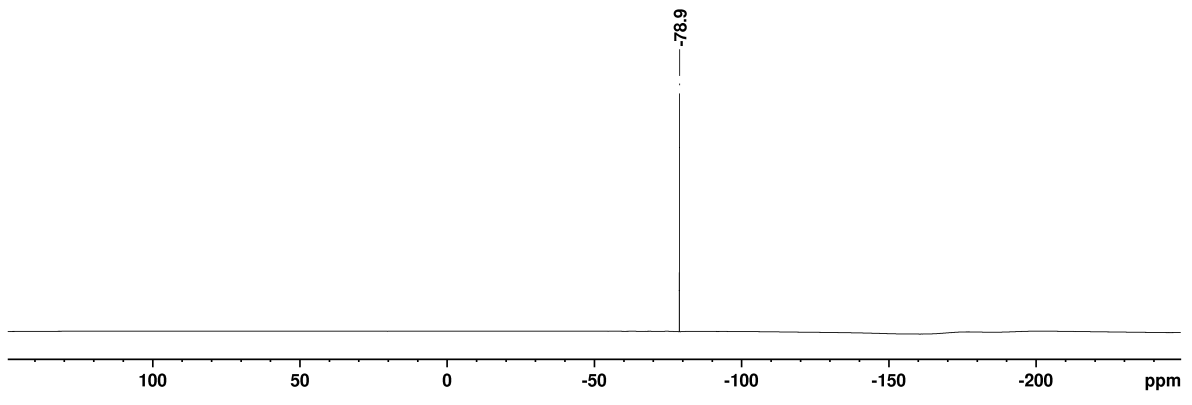

Figure S 60:  $^{19}\text{F}\{^1\text{H}\}$  NMR spectrum of **18b**[OTf]<sub>2</sub> in CD<sub>2</sub>Cl<sub>2</sub>.

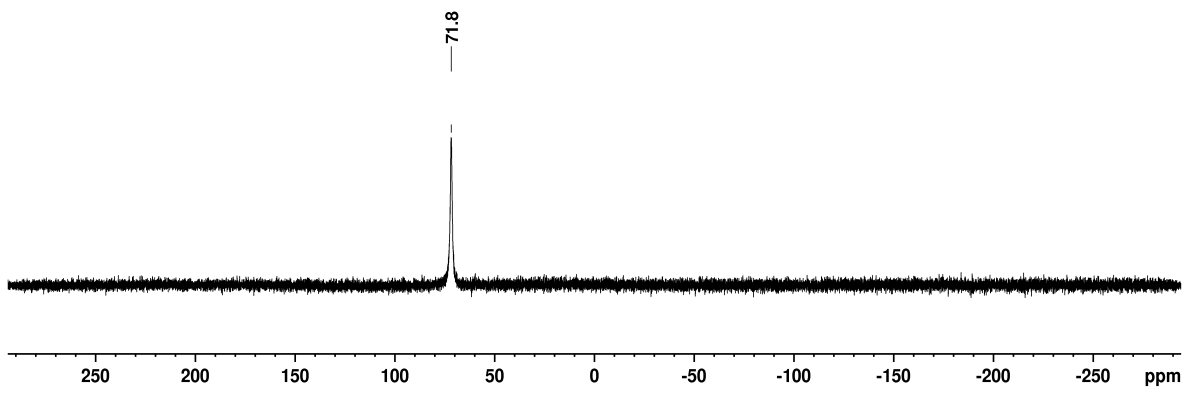

Figure S 61:  $^{31}\text{P}\{^1\text{H}\}$  NMR spectrum of **18b**[OTf]<sub>2</sub> in CD<sub>2</sub>Cl<sub>2</sub>.

### 2.5.3. Synthesis of **19**[OTf]<sub>2</sub>

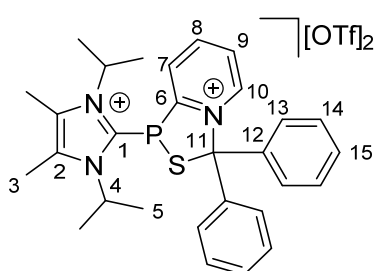

**11**[OTf] (300.0 mg, 0.630 mmol, 1.0 equiv.), silver triflate (162.6 mg, 0.630 mmol, 1.0 equiv.) and thiobenzophenone (150.0 mg, 0.758 mmol, 1.2 equiv.) are suspended in 10 mL of CH<sub>2</sub>Cl<sub>2</sub> and stirred for 6 h. The resulting solid is filtered off and the solvent removed *in vacuo*. The remaining solid is recrystallized from CH<sub>2</sub>Cl<sub>2</sub> and Et<sub>2</sub>O. By filtration and washing with *n*-pentane, **19**[OTf]<sub>2</sub> is obtained as a yellow, air and moisture

sensitive solid. Suitable crystals for X-ray diffraction analysis can be obtained by slow diffusion of *n*-pentane to a CH<sub>2</sub>Cl<sub>2</sub> solution at -30 °C.

**Yield:** 433 mg (87 %); **m.p.** 207 °C (decomp.); **Raman** (100 mW, 200 scans, 298 K, cm<sup>-1</sup>): 3095 (24), 3077 (47), 3067 (37), 2990 (38), 2948 (46), 1611 (57), 1599 (73), 1562 (46), 1462 (46), 1446 (45), 1414 (47), 1405 (47), 1392 (43), 1366 (55), 1305 (37), 1276 (87), 1224 (42), 1193 (38), 1173 (43), 1159 (55), 1104 (39), 1048 (52), 1032 (100), 1000 (57), 889 (33), 800 (30), 756 (37), 713 (26), 697 (26), 680 (34), 637 (25), 618 (29), 589 (24), 574 (29), 552 (26), 522 (39), 504 (26), 464 (25), 450 (28), 404 (29), 378 (26), 349 (35), 313 (32), 289 (25), 270 (25), 250 (24); **IR** (ATR, 298 K, cm<sup>-1</sup>): 1610 (vw), 1599 (vw), 1473 (vw), 1453 (vw), 1432 (vw), 1410 (vw), 1383 (vw), 1263 (vs), 1253 (vs), 1222 (m), 1155 (s), 1138 (m), 1118 (w), 1087 (vw), 1028 (vs), 1000 (vw), 906 (vw), 890 (vw), 798 (vw), 776 (w), 749 (m), 733 (vw), 711 (vw), 693 (m), 635 (vs), 572 (w), 551 (vw), 516 (s), 501 (w), 449 (w), 419 (vw); **<sup>1</sup>H NMR** (CD<sub>3</sub>CN, 298 K, in ppm) δ = 1.43 (6H, d, <sup>3</sup>J<sub>HH</sub> = 5.1 Hz, H5), 1.65 (6H, d, <sup>3</sup>J<sub>HH</sub> = 7.9 Hz, H5), 2.46 (6H, s, H3), 4.94 (2H, s(br), H4), 7.14 (2H, d, <sup>3</sup>J<sub>HH</sub> = 6.6 Hz, H13), 7.35 (2H, d, <sup>3</sup>J<sub>HH</sub> = 7.5 Hz, H13), 7.54 (2H, m, H14/H15), 7.62 (3H, m, H14/H15), 7.69 (1H, m, H14/H15), 8.14 (1H, m, H9), 8.43 (1H, d, <sup>3</sup>J<sub>HH</sub> = 7.9 Hz, H7), 8.55 (1H, d, <sup>3</sup>J<sub>HH</sub> = 7.6 Hz, H10), 8.66 (1H, m, H8); **<sup>13</sup>C{<sup>1</sup>H} NMR** (CD<sub>3</sub>CN, 298 K, in ppm): δ = 11.4 (2C, s, C3), 20.8 (2C, s, C5), 21.5 (2C, s, C5), 55.1 (1C, s, C4), 55.3 (1C, s, C4), 98.0 (1C, d, <sup>2</sup>J<sub>CP</sub> = 2 Hz, C11), 122.1 (2C, q, <sup>1</sup>J<sub>CF</sub> = 320 Hz, CF3), 128.7 (2C, d, <sup>4</sup>J<sub>CP</sub> = 1 Hz, C13), 130.2 (1C, s, C9), 130.4 (2C, s, C14/C15), 131.1 (2C, s, C14/C15), 131.4 (2C, s, C13), 132.0 (1C, s, C12), 132.9 (1C, d, <sup>2</sup>J<sub>CP</sub> = 11 Hz, C7), 133.3 (2C, s, C14/C15), 136.1 (1C, d, <sup>3</sup>J<sub>CP</sub> = 2 Hz, C12), 136.6 (2C, s(br), C2), 136.7 (1C, s, C12), 146.4 (1C, s, C10), 147.2 (1C, d, <sup>3</sup>J<sub>CP</sub> = 2 Hz, C8), 156.2 (1C, d, <sup>1</sup>J<sub>CP</sub> = 42 Hz, C6); **<sup>19</sup>F{<sup>1</sup>H} NMR** (CD<sub>3</sub>CN, 298 K, in ppm): δ = -79.3 (s); **<sup>31</sup>P{<sup>1</sup>H} NMR** (CD<sub>3</sub>CN, 298 K, in ppm): δ = -15.1 (s); **elemental analysis:** calculated for C<sub>31</sub>H<sub>34</sub>F<sub>6</sub>N<sub>3</sub>O<sub>7</sub>PS<sub>2</sub>·0.3 CH<sub>2</sub>Cl<sub>2</sub>: N 5.18, C 46.34, H 4.30, S 11.86; found: N 5.50, C 45.90, H 4.12, S 12.31.

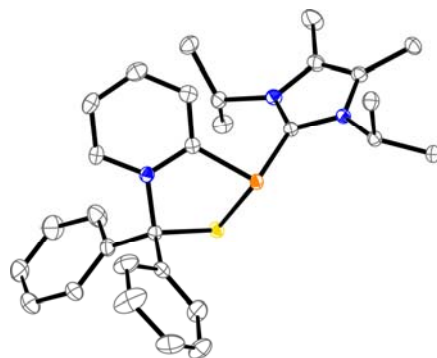

**Figure S 62:** Molecular structure of  $19^{2+}$  in  $19[OTf]_2$ ; thermal ellipsoids are displayed at 50 % probability level, hydrogen atoms and counterions are omitted for clarity.

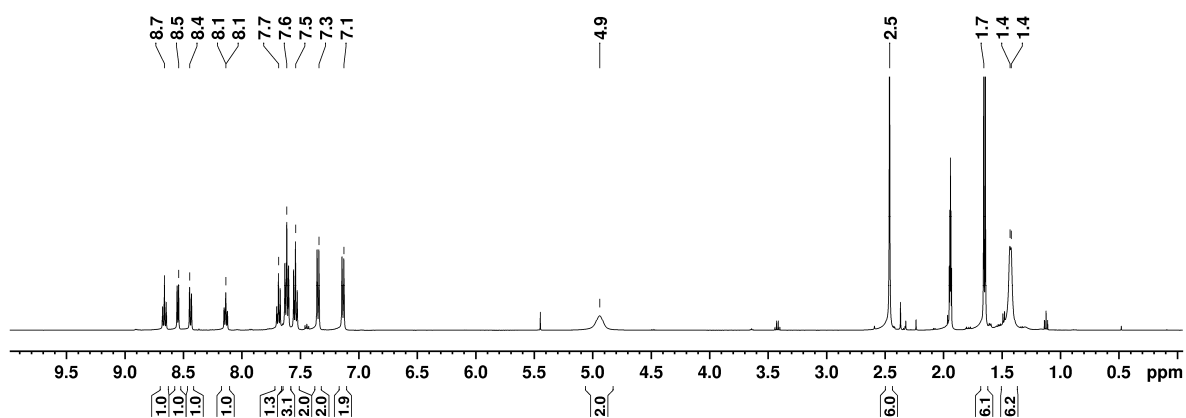

**Figure S 63:**  $^1H$  NMR spectrum of  $19[OTf]_2$  in  $CD_3CN$ .

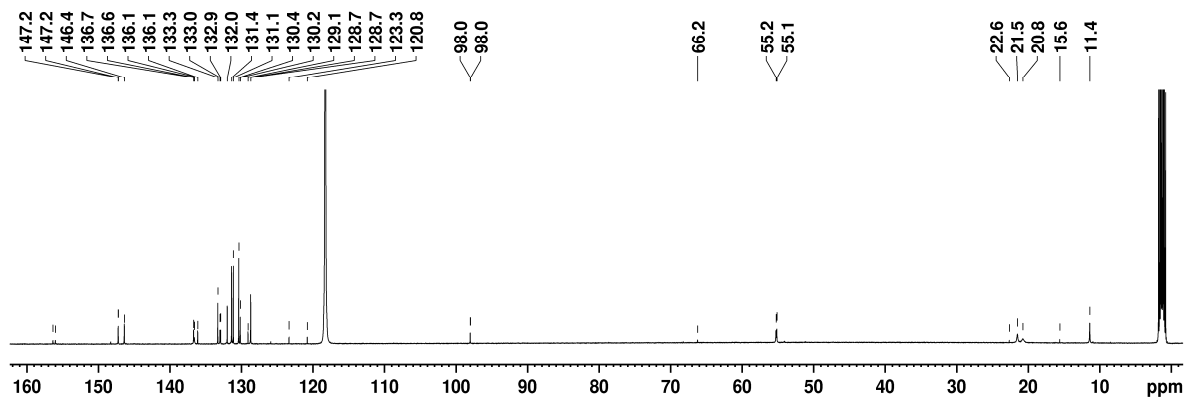

**Figure S 64:**  $^{13}C\{^1H\}$  NMR spectrum of  $19[OTf]_2$  in  $CD_3CN$ .

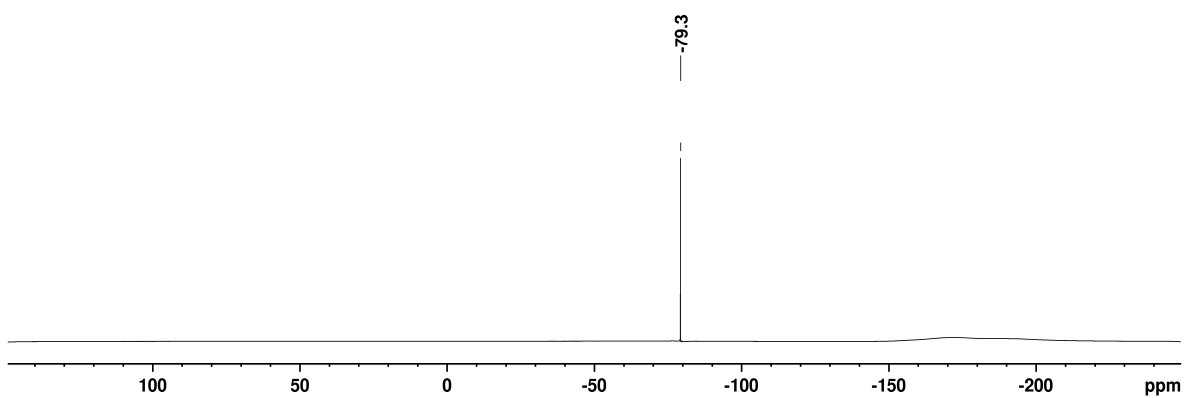

**Figure S 65:**  $^{19}\text{F}\{^1\text{H}\}$  NMR spectrum of  $19[\text{OTf}]_2$  in  $\text{CD}_3\text{CN}$ .

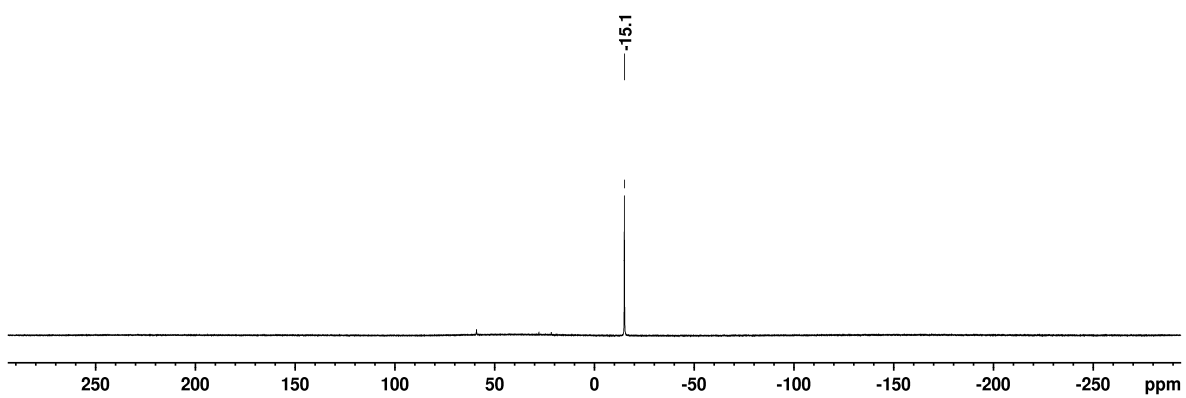

**Figure S 66:**  $^{31}\text{P}\{^1\text{H}\}$  NMR spectrum of  $19[\text{OTf}]_2$  in  $\text{CD}_3\text{CN}$ .

#### 2.5.4. Synthesis of **20**[OTf]<sub>2</sub>

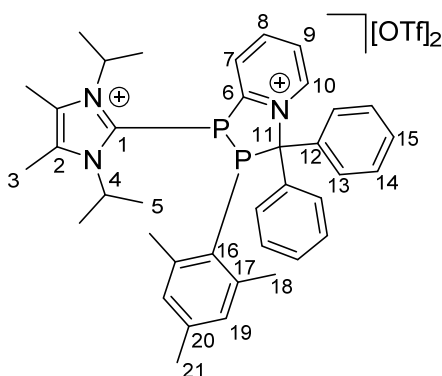

**11**[OTf] (184.0 mg, 0.388 mmol, 1.0 equiv.), silver triflate (100.0 mg, 0.389 mmol, 1.0 equiv.) and MesP=CPh<sub>2</sub> (123.0 mg, 0.389 mmol, 1.0 equiv.) are suspended in 5 mL of 1,2-C<sub>2</sub>H<sub>4</sub>Cl<sub>2</sub> and stirred for 4 h. The resulting solid is filtered off and *n*-pentane is added to precipitate the product. By filtration and washing with *n*-pentane, **20**[OTf]<sub>2</sub> is obtained as a pale yellow, air and moisture sensitive solid. Suitable crystals for X-ray diffraction analysis can be obtained by slow diffusion of *n*-pentane to a 1,2-C<sub>2</sub>H<sub>4</sub>Cl<sub>2</sub> solution at -30 °C.

**Yield:** 251 mg (88 %); **m.p.** 217 °C (decomp.); **Raman** (80 mW, 200 scans, 298 K, cm<sup>-1</sup>): 3075 (41), 2979 (44), 2950 (51), 2918 (49), 1605 (88), 1559 (26), 1461 (31), 1446 (29), 1400 (38), 1357 (48), 1288 (51), 1269 (100), 1152 (57), 1108 (35), 1052 (84), 1032 (95), 1003 (56), 882 (25), 842 (49), 755 (37), 675 (37), 570 (36), 518 (29), 507 (33), 385 (31), 348 (36), 312 (41), 287 (34), 273 (31); **IR** (ATR, 298 K, cm<sup>-1</sup>): 2976 (vw), 1600 (vw), 1473 (w), 1448 (vw), 1428 (vw), 1398 (vw), 1378 (vw), 1260 (vs), 1223 (m), 1146 (s), 1089 (vw), 1052 (vw), 1029 (vs), 904 (vw), 849 (vw), 780 (w), 761 (w), 753 (w), 738 (w), 729 (w), 707 (w), 694 (w), 635 (vs); **<sup>1</sup>H NMR** (CD<sub>3</sub>CN, 298 K, in ppm) δ = 1.38 (3H, s(br), H1), 1.51 (3H, d, <sup>3</sup>J<sub>HH</sub> = 7.00 Hz, H1), 1.55 (3H, d, <sup>3</sup>J<sub>HH</sub> = 6.90 Hz, H1), 1.58 (3H, d, *D*<sub>HH</sub> = 6.88 Hz, H18), 1.76 (3H, s(br), H1), 2.18 (3H, d, *D*<sub>HH</sub> = 1.56 Hz, H18), 2.25 (3H, s, H21), 2.46 (6H, s, H4), 4.99 (1H, m, H2), 5.53 (1H, s(br), H2), 6.00 (2H, m, H15), 6.85 (1H, s, H19), 6.93 (1H, d, *D*<sub>HH</sub> = 6.88 Hz, H19), 7.26 (2H, m, H14), 7.50 (2H, m, H13), 7.63 (2H, m, H13), 7.79 (2H, m, H14), 7.97 (1H, m, H9), 8.15 (1H, d, *D*<sub>HH</sub> = 6.52 Hz, H10), 8.38 (1H, m, H7), 8.57 (1H, m, H8); **<sup>13</sup>C{<sup>1</sup>H} NMR** (CD<sub>3</sub>CN, 298 K, in ppm): δ = 11.38 (2C, s, C4), 21.12 (1C, s, C21), 21.57 (4C, s, C1), 24.20 (1C, d, <sup>3</sup>J<sub>CP</sub> = 29.58 Hz, C18), 26.42 (1C, s, C18), 55.33 (1C, s, C2), 55.58 (1C, s, C2), 121.73 (1C, m, C16), 127.22 (2C, s, C15), 129.71 (2C, s, C14), 130.42 (1C, d, <sup>4</sup>J<sub>CP</sub> = 1.39 Hz, C9), 130.59 (1C, s, C11), 131.12 (1C, s, C19), 131.13 (2C, s, C13), 132.68 (2C, s, C14), 132.74 (2C, s, C13), 133.76 (1C, d, <sup>2</sup>J<sub>CP</sub> = 12.68 Hz, C7), 135.51 (2C, s, C3), 138.04 (1C, s, C12), 138.23 (1C, s, C12), 144.68 (1C, s, C20), 146.84 (1C, d, <sup>3</sup>J<sub>CP</sub> = 3.03 Hz, C8), 147.76 (1C, d, <sup>3</sup>J<sub>CP</sub> = 1.39 Hz, C10), 148.33 (2C, s, C17), 158.79 (1C, m, C6); **<sup>19</sup>F{<sup>1</sup>H} NMR** (CD<sub>3</sub>CN, 298 K, in ppm): δ = -79.3 (s); **<sup>31</sup>P{<sup>1</sup>H} NMR** (CD<sub>3</sub>CN, 298 K, in ppm): δ(P<sub>A</sub>) = -51.0, δ(P<sub>B</sub>) = 29.7, <sup>1</sup>J<sub>AB</sub> = -170 Hz; **elemental analysis:** calculated for C<sub>40</sub>H<sub>45</sub>ClF<sub>6</sub>N<sub>3</sub>O<sub>6</sub>P<sub>2</sub>S<sub>2</sub>: N 4.65, C 53.15, H 5.02, S 7.09; found: N 4.50, C 53.43, H 4.78, S 7.02.

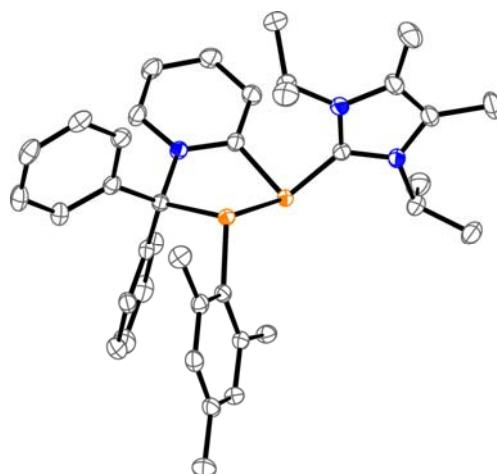

**Figure S 67:** Molecular structure of  $20^{2+}$  in  $20[OTf]_2 \cdot 2 C_2H_4Cl_2$ ; thermal ellipsoids are displayed at 50 % probability level, hydrogen atoms, solvent molecules and counterions are omitted for clarity.

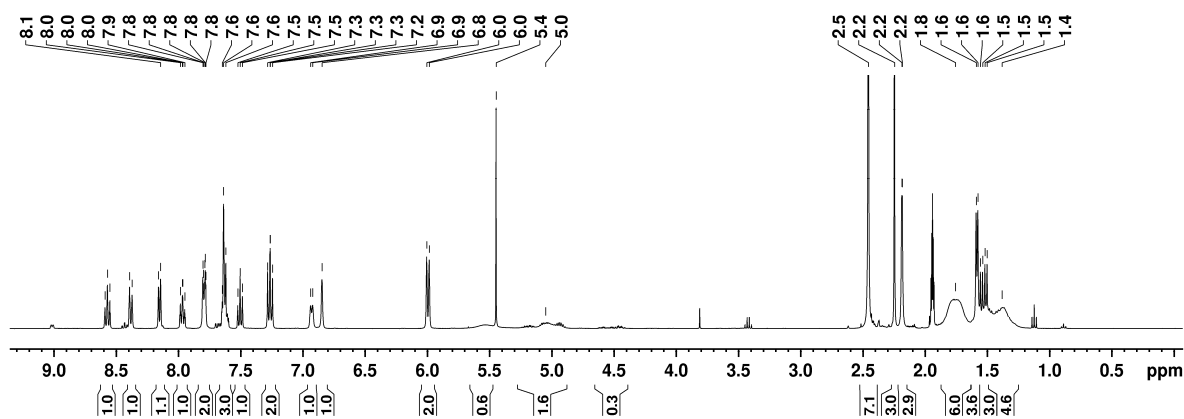

**Figure S 68:**  $^1H$  NMR spectrum of  $20[OTf]_2$  in  $CD_3CN$ .

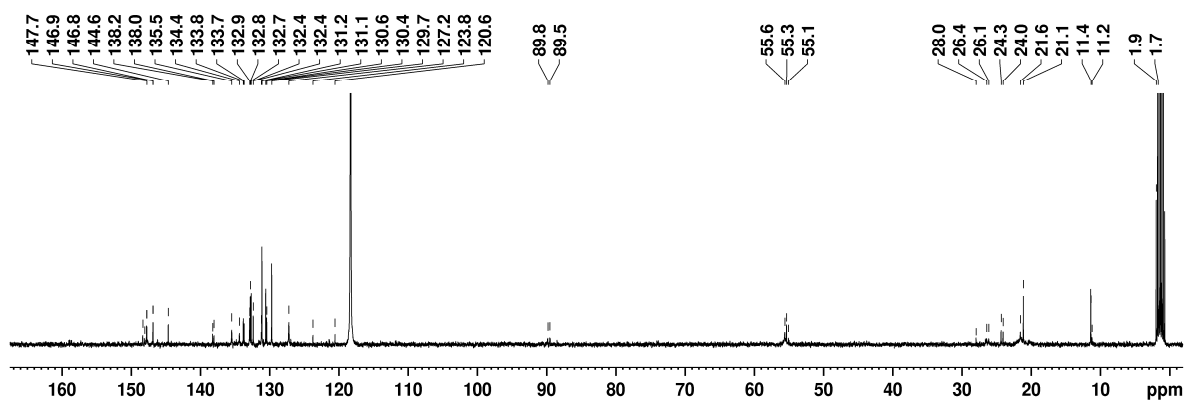

**Figure S 69:**  $^{13}C\{^1H\}$  NMR spectrum of  $20[OTf]_2$  in  $CD_3CN$ .



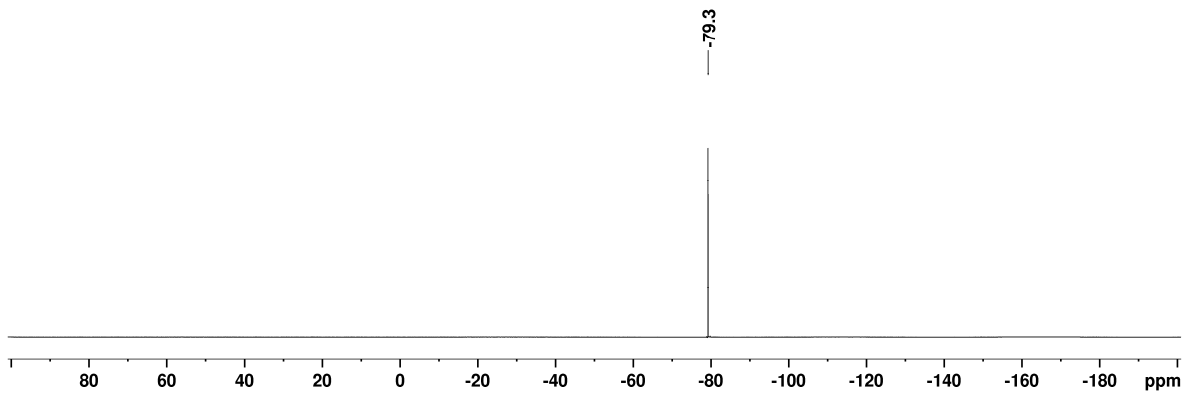

**Figure S 70:**  $^{19}\text{F}\{^1\text{H}\}$  NMR spectrum of  $20[\text{OTf}]_2$  in  $\text{CD}_3\text{CN}$ .

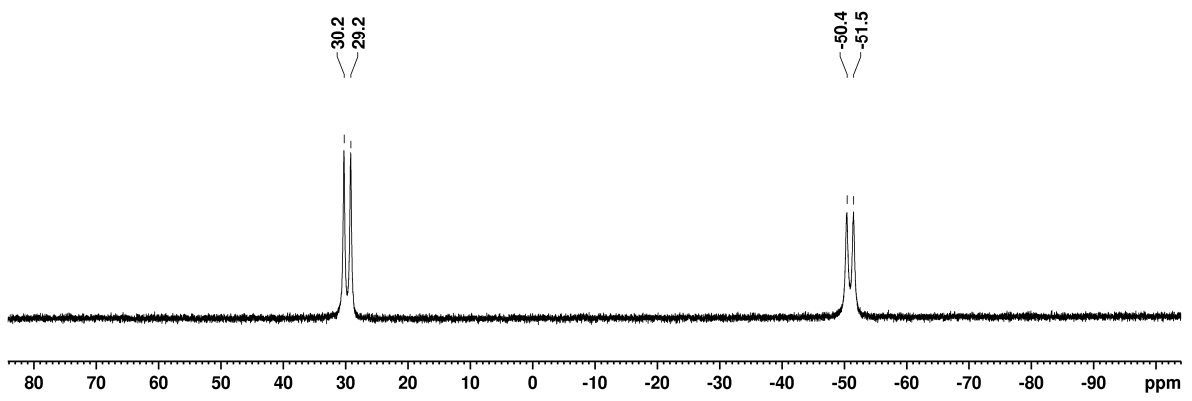

**Figure S 71:**  $^{31}\text{P}\{^1\text{H}\}$  NMR spectrum of  $20[\text{OTf}]_2$  in  $\text{CD}_3\text{CN}$ .

## 2.6. Cycloaddition reactions of 24[OTf] with nitriles

### 2.6.1. Synthesis of 26a[OTf]<sub>2</sub>

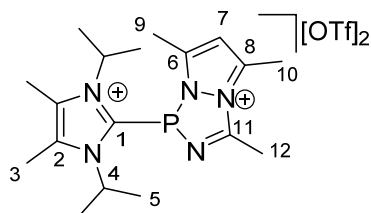

**22**[OTf] (60 mg, 0.139 mmol, 1.0 equiv.), **23**[OTf] (76.6 mg, 0.139 mmol, 1.0 equiv.) and silver triflate (78.6 mg, 0.306 mmol, 2.2 equiv.) are suspended in 3 mL of CH<sub>2</sub>Cl<sub>2</sub> and stirred for 2 h under exclusion of light. The resulting solid is filtered off and the solvent removed *in vacuo*. After addition of 2 mL of CH<sub>3</sub>CN the reaction mixture is stirred overnight. By adding Et<sub>2</sub>O, filtration and

washing with Et<sub>2</sub>O, **26a**[OTf]<sub>2</sub> is obtained as a colorless, air and moisture sensitive solid. Suitable crystals for X-ray diffraction analysis can be obtained by diffusion of Et<sub>2</sub>O to a CH<sub>3</sub>CN solution at -30 °C.

**Yield:** 148 mg (82 %); **m.p.** 180 °C; **Raman** (100 mW, 500 scans, 298 K, cm<sup>-1</sup>): 3130 (9), 2996 (32), 2944 (61), 2752 (12), 2413 (12), 2244 (12), 2219 (12), 2186 (12), 2158 (12), 2125 (13), 2077 (13), 2061 (13), 1628 (44), 1603 (39), 1551 (26), 1466 (58), 1407 (36), 1386 (46), 1338 (39), 1310 (24), 1271 (64), 1224 (34), 1194 (24), 1152 (31), 1120 (21), 1080 (35), 1032 (100), 979 (20), 908 (19), 887 (28), 792 (20), 755 (47), 702 (23), 648 (20), 633 (21), 615 (22), 579 (38), 565 (32), 544 (25), 533 (23), 518 (22), 457 (28), 428 (29), 403 (22), 348 (40), 313 (47), 278 (28); **IR** (ATR, 298 K, cm<sup>-1</sup>): 1627 (w), 1603 (vw), 1552 (vw), 1465 (vw), 1415 (w), 1398 (w), 1380 (w), 1337 (w), 1255 (vs), 1221 (s), 1196 (w), 1148 (vs), 1119 (m), 1094 (w), 1079 (m), 1048 (vw), 1029 (vs), 999 (w), 908 (vw), 887 (vw), 862 (vw), 822 (w), 792 (w), 776 (w), 754 (w), 663 (vw), 635 (vs), 587 (w), 572 (m), 565 (m), 544 (w), 533 (w), 516 (s), 457 (w), 428 (m); **<sup>1</sup>H NMR** (CD<sub>3</sub>CN, 298 K, in ppm) δ = 1.56 (6H, d, <sup>3</sup>J<sub>HH</sub> = 6.18 Hz, H5), 1.66 (6H, d, <sup>3</sup>J<sub>HH</sub> = 6.78 Hz, H5), 2.46 (6H, s, H3), 2.54 (3H, d, <sup>3</sup>J<sub>HH</sub> = 2.25 Hz, H10), 2.88 (3H, d, <sup>3</sup>J<sub>HH</sub> = 2.50 Hz, H9), 2.97 (3H, d, <sup>3</sup>J<sub>HH</sub> = 5.13 Hz, H12), 4.65 (2H, s(br), H4), 6.92 (1H, s, H7); **<sup>13</sup>C{<sup>1</sup>H} NMR** (CD<sub>3</sub>CN, 298 K, in ppm): δ = 10.65 (2C, s, C3), 12.78 (1C, s, C10), 12.84 (1C, d, <sup>3</sup>J<sub>CP</sub> = 1 Hz, C9), 19.10 (1C, d, <sup>3</sup>J<sub>CP</sub> = 6 Hz, C12), 20.30 (2C, s, C1), 20.81 (2C, s, C5), 53.67 (2C, d, <sup>3</sup>J<sub>CP</sub> = 13 Hz, C4), 118.25 (1C, d, <sup>3</sup>J<sub>CP</sub> = 4 Hz, C7), 121.07 (2C, q, <sup>1</sup>J<sub>CF</sub> = 321 Hz, OTf), 128.98 (1C, d, <sup>1</sup>J<sub>CP</sub> = 83 Hz, C1), 136.40 (2C, s, C3), 149.32 (1C, d, <sup>2</sup>J<sub>CP</sub> = 4 Hz, C6), 155.79 (1C, d, <sup>3</sup>J<sub>CP</sub> = 5 Hz, C8), 157.35 (1C, s, C11); **<sup>19</sup>F{<sup>1</sup>H} NMR** (CD<sub>3</sub>CN, 330K, in ppm): δ = -79.2 (s); **<sup>31</sup>P{<sup>1</sup>H} NMR** (CD<sub>3</sub>CN, 330K, in ppm): δ = 62.7 (s); **elemental analysis:** calculated for C<sub>20</sub>H<sub>30</sub>F<sub>6</sub>N<sub>5</sub>O<sub>6</sub>PS<sub>2</sub>: N 10.85, C 37.21, H 4.68, S 9.93; found: N 10.68, C 36.73, H 4.87, S 10.32.

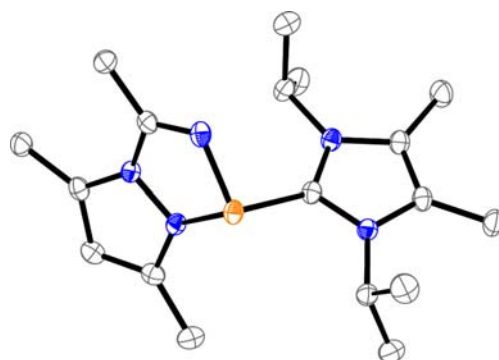

**Figure S 72:** Molecular structure of  $26a^{2+}$  in  $26a[OTf]_2 \cdot CH_2Cl_2$ ; thermal ellipsoids are displayed at 50 % probability level, hydrogen atoms, solvate molecules and counterions are omitted for clarity.

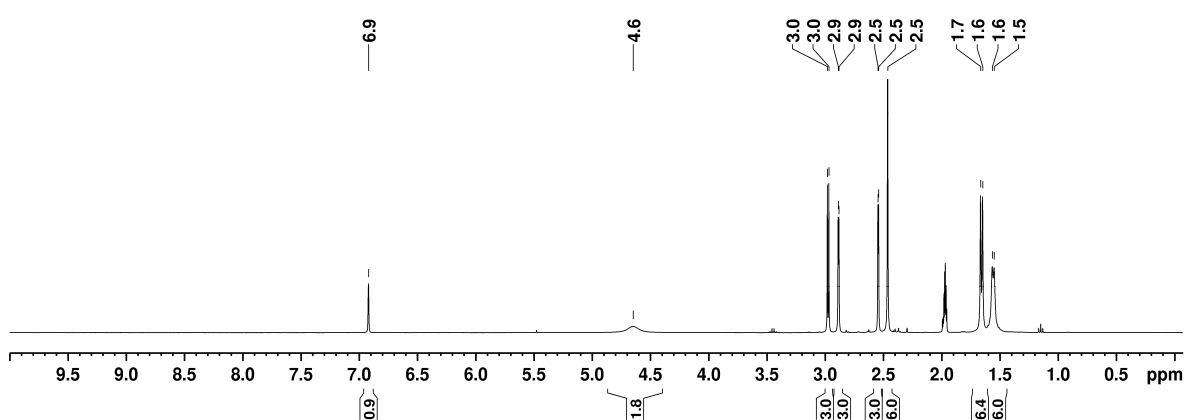

**Figure S 73:**  $^1H$  NMR spectrum of  $26a[OTf]_2$  in  $CD_3CN$ .

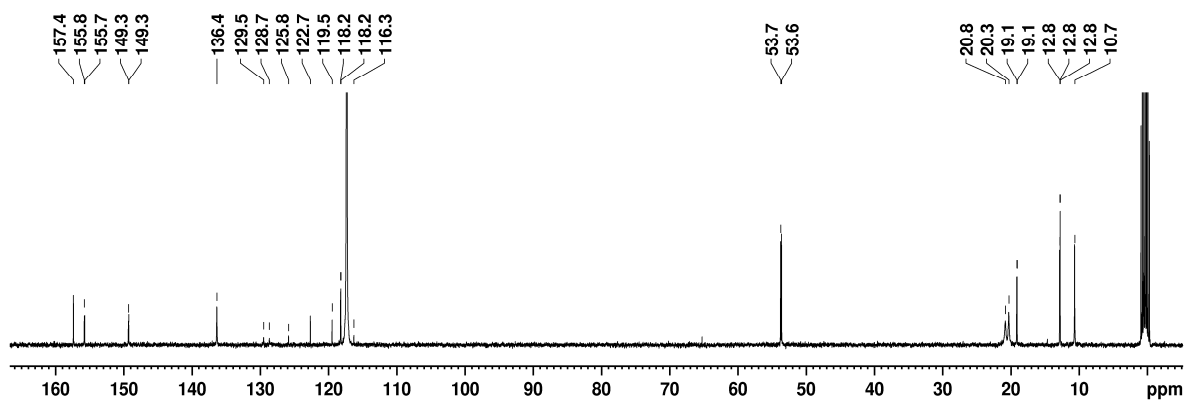

**Figure S 74:**  $^{13}C\{^1H\}$  NMR spectrum of  $26a[OTf]_2$  in  $CD_3CN$ .

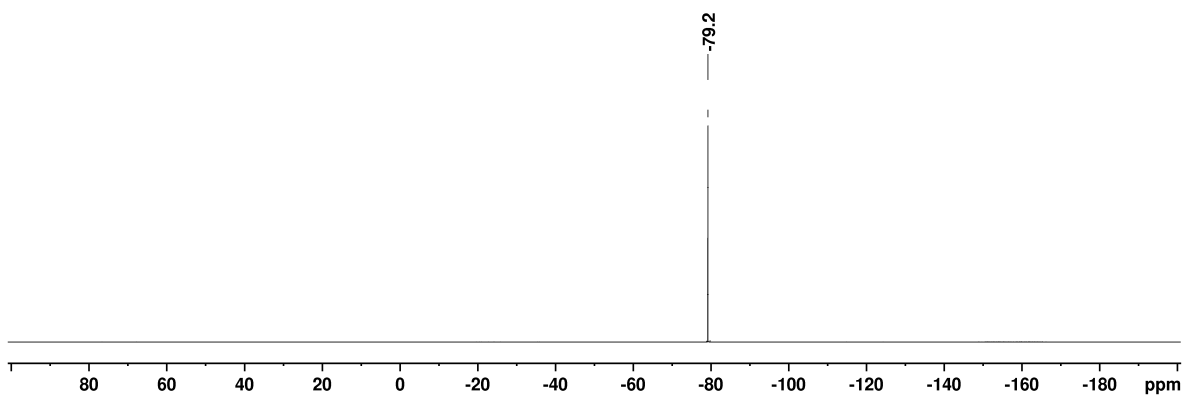

**Figure S 75:**  $^{19}\text{F}\{^1\text{H}\}$  NMR spectrum of **26a**[OTf] $_2$  in  $\text{CD}_3\text{CN}$ .

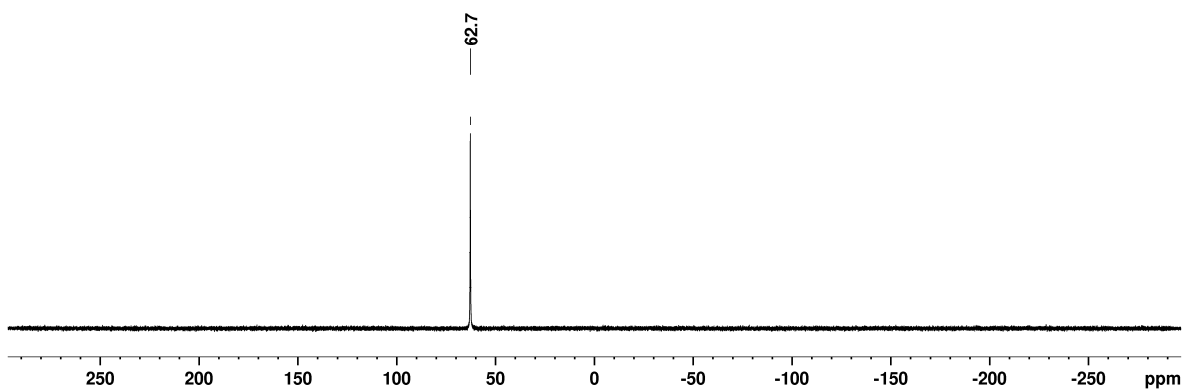

**Figure S 76:**  $^{31}\text{P}\{^1\text{H}\}$  NMR spectrum of **26a**[OTf] $_2$  in  $\text{CD}_3\text{CN}$ .

## 2.6.2. Synthesis of **26b**[OTf]<sub>2</sub>

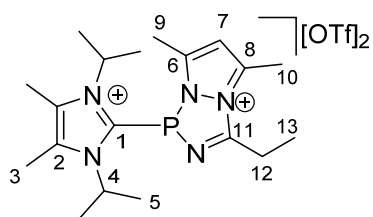

**22**[OTf] (60 mg, 0.139 mmol, 1.0 equiv.), **23**[OTf] (76.6 mg, 0.139 mmol, 1.0 equiv.) and silver triflate (78.6 mg, 0.306 mmol, 2.2 equiv.) are suspended in 3 mL of CH<sub>2</sub>Cl<sub>2</sub> and stirred for 2 h under exclusion of light. The resulting solid is filtered off and the solvent removed *in vacuo*. After addition of 2 mL of EtCN the reaction mixture is stirred overnight. By adding Et<sub>2</sub>O, filtration and

washing with Et<sub>2</sub>O, **26b**[OTf]<sub>2</sub> is obtained as a colorless, air and moisture sensitive solid. Suitable crystals for X-ray diffraction analysis can be obtained by diffusion of Et<sub>2</sub>O to a CH<sub>3</sub>CN solution at -30 °C.

**Yield:** 62 mg (34 %); **m.p.** 161 °C; **Raman** (100 mW, 200 scans, 298 K, [cm<sup>-1</sup>]): Raman (100 mW, 200 scans, 298 K, cm<sup>-1</sup>): 2995 (32), 2945 (66), 1631 (32), 1608 (44), 1550 (30), 1466 (61), 1411 (41), 1386 (40), 1364 (37), 1339 (39), 1271 (71), 1256 (39), 1226 (43), 1153 (34), 1086 (35), 1032 (100), 888 (34), 791 (27), 755 (50), 592 (41), 574 (49), 543 (31), 456 (37), 443 (36), 349 (52), 315 (50), 275 (35), 225 (34); **IR** (ATR, 298 K, cm<sup>-1</sup>): 2949 (vw), 1611 (vw), 1550 (vw), 1463 (vw), 1412 (vw), 1399 (vw), 1379 (vw), 1337 (vw), 1266 (w), 1255 (w), 1222 (w), 1149 (w), 1119 (vw), 1105 (vw), 1085 (vw), 1028 (m), 1002 (vw), 972 (vw), 837 (vw), 789 (vw), 754 (vw), 635 (m), 572 (w), 532 (vw), 516 (w), 445 (w); **<sup>1</sup>H NMR** (CD<sub>3</sub>CN, 298 K, in ppm) δ = 1.45 (3H, t, <sup>3</sup>J<sub>HH</sub> = 7.02 Hz, H13), 1.56 (6H, d, <sup>3</sup>J<sub>HH</sub> = 5.92 Hz, H5), 1.66 (6H, d, <sup>3</sup>J<sub>HH</sub> = 6.96 Hz, H5), 2.47 (6H, s, H3), 2.54 (3H, d, <sup>3</sup>J<sub>HH</sub> = 2.20 Hz, H10), 2.88 (3H, d, <sup>3</sup>J<sub>HH</sub> = 2.56 Hz, H9), 3.22 (1H, dqd, <sup>2</sup>J<sub>HH</sub> = 19.38 Hz, <sup>3</sup>J<sub>HH</sub> = 11.75, *D*<sub>HH</sub> = 3.16 Hz, H12), 3.41 (1H, m, H12), 4.65 (2H, s(br), H4), 6.92 (1H, s, H7); **<sup>13</sup>C{<sup>1</sup>H} NMR** (CD<sub>3</sub>CN, 298 K, in ppm): δ = 8.41 (1C, s, C13), 10.64 (2C, s, C3), 12.75 (1C, s, C10), 13.10 (1C, s, C9), 20.28 (2C, s, C5), 20.85 (2C, s, C5), 26.09 (1C, d, <sup>3</sup>J<sub>CP</sub> = 5 Hz, C12), 53.54 (1C, s, C4), 53.68 (1C, s, C4), 118.22 (1C, d, <sup>3</sup>J<sub>CP</sub> = 4 Hz, C7), 121.09 (2C, q, <sup>1</sup>J<sub>CF</sub> = 320 Hz, OTf), 129.60 (1C, s(br), C1), 136.38 (2C, s, C2), 149.05 (1C, d, <sup>2</sup>J<sub>CP</sub> = 4 Hz, C6), 155.47 (1C, d, <sup>3</sup>J<sub>CP</sub> = 4 Hz, C8), 161.76 (1C, s, C11); **<sup>19</sup>F{<sup>1</sup>H} NMR** (CD<sub>3</sub>CN, 298 K, in ppm): δ = -79.3 (s); **<sup>31</sup>P{<sup>1</sup>H} NMR** (CD<sub>3</sub>CN, 298 K, in ppm): δ = 64.4 (s); **elemental analysis:** calculated for C<sub>21</sub>H<sub>32</sub>F<sub>6</sub>N<sub>5</sub>O<sub>6</sub>PS<sub>2</sub>: N 10.62, C 38.24, H 4.89, S 9.72; found: N 10.55, C 38.01, H 4.89, S 10.25.

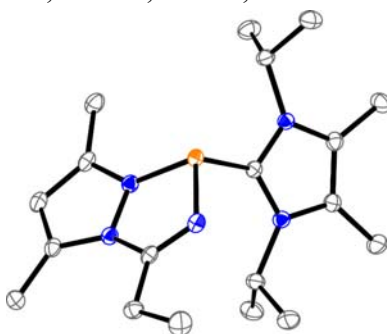

**Figure S 77:** Molecular structure of **26b**<sup>2+</sup> in **26b**[OTf]<sub>2</sub>; thermal ellipsoids are displayed at 50 % probability level, hydrogen atoms, solvate molecules and counterions are omitted for clarity.

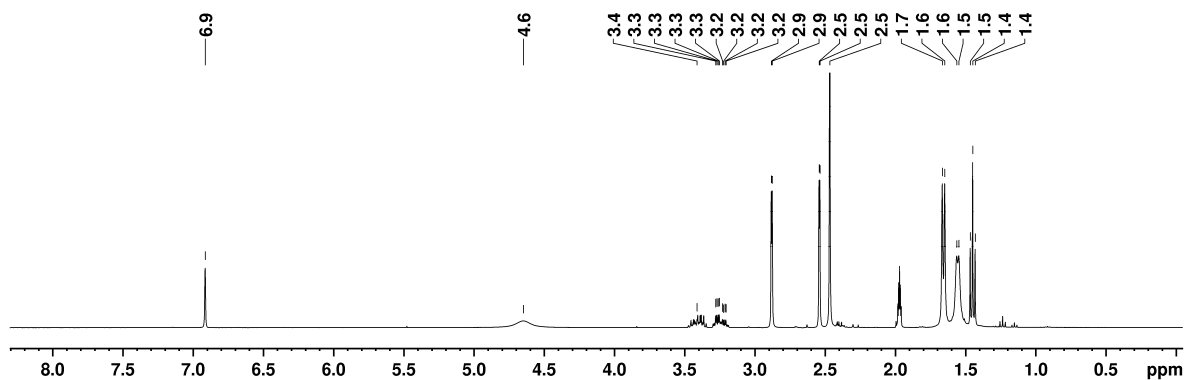

**Figure S 78:** <sup>1</sup>H NMR spectrum of **26b**[OTf]<sub>2</sub> in CD<sub>3</sub>CN.

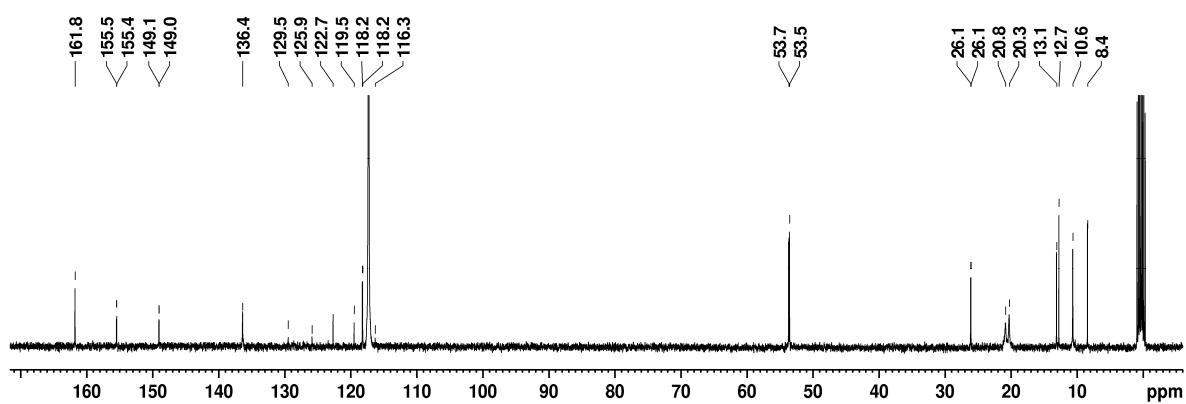

**Figure S 79:** <sup>13</sup>C{<sup>1</sup>H} NMR spectrum of **26b**[OTf]<sub>2</sub> in CD<sub>3</sub>CN.

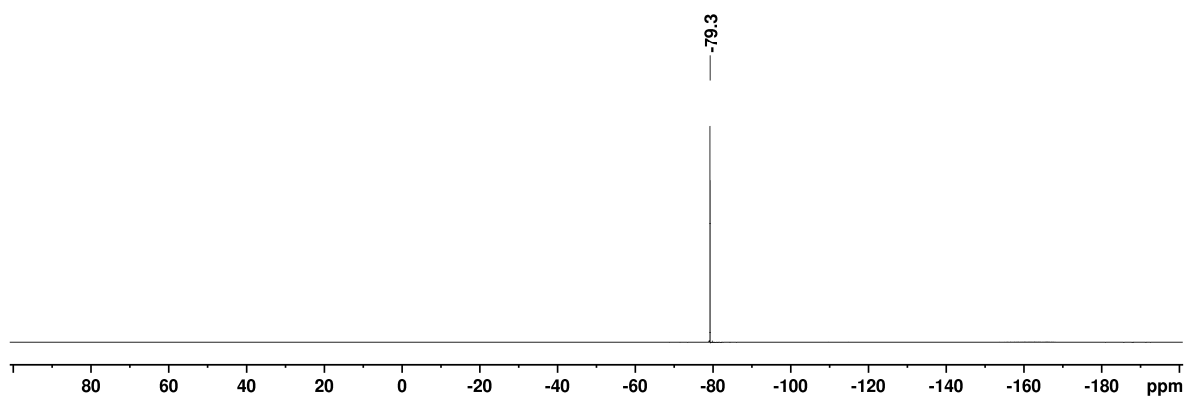

**Figure S 80:** <sup>19</sup>F{<sup>1</sup>H} NMR spectrum of **26b**[OTf]<sub>2</sub> in CD<sub>3</sub>CN.

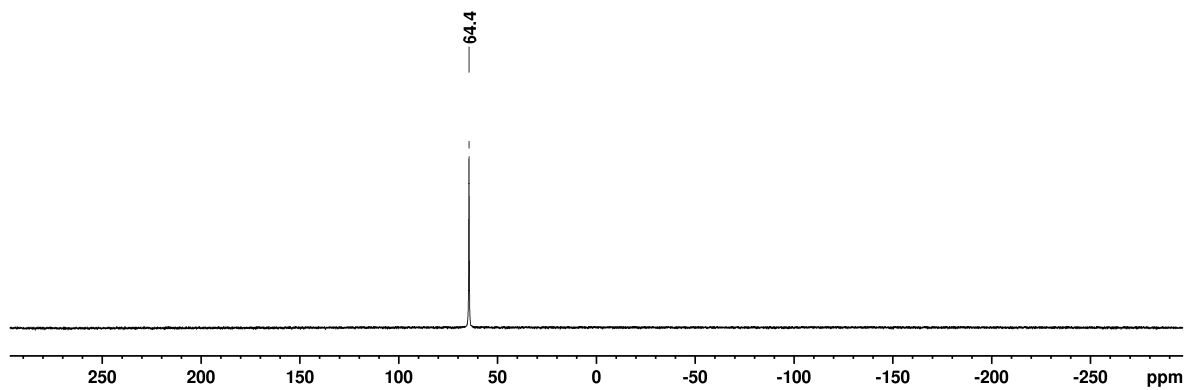

**Figure S 81:**  $^{31}\text{P}\{^1\text{H}\}$  NMR spectrum of **26b**[OTf]<sub>2</sub> in CD<sub>3</sub>CN.

### 2.6.3. Synthesis of **26c**[OTf]<sub>2</sub>

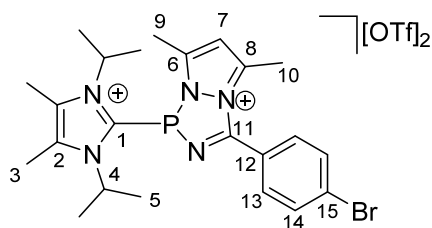

**22**[OTf] (60 mg, 0.139 mmol, 1.0 equiv.), **23**[OTf] (76.6 mg, 0.139 mmol, 1.0 equiv.) and silver triflate (78.6 mg, 0.306 mmol, 2.2 equiv.) are suspended in 3 mL of CH<sub>2</sub>Cl<sub>2</sub> and stirred for 2 h under exclusion of light. The resulting solid is filtered off and the solvent removed *in vacuo*. A solution of 4-bromobenzonitrile (61 mg, 0.335 mmol, 2.3 equiv.) in 2 mL

C<sub>6</sub>H<sub>5</sub>F is added and stirred overnight. By filtration and washing with C<sub>6</sub>H<sub>5</sub>F and Et<sub>2</sub>O, **26c**[OTf]<sub>2</sub> is obtained as a colorless, air and moisture sensitive solid. Suitable crystals for X-ray diffraction analysis can be obtained by slow diffusion of Et<sub>2</sub>O to a CH<sub>3</sub>CN solution at –30 °C.

**Yield:** 178 mg (81 %); **m.p.** 159 °C; **Raman** (100 mW, 500 scans, 298 K, cm<sup>-1</sup>): 3073 (14), 3000 (20), 2946 (38), 2747 (10), 2562 (11), 2231 (11), 2158 (10), 2112 (11), 2061 (11), 1614 (62), 1600 (100), 1563 (27), 1541 (31), 1457 (34), 1401 (30), 1384 (30), 1364 (22), 1325 (22), 1260 (44), 1223 (24), 1186 (35), 1150 (27), 1071 (28), 1031 (50), 959 (17), 886 (19), 831 (19), 806 (18), 756 (27), 695 (20), 685 (21), 639 (18), 625 (22), 584 (25), 574 (24), 551 (22), 518 (18), 456 (21), 436 (21), 410 (25), 348 (30), 313 (32), 271 (24); **IR** (ATR, 298 K, cm<sup>-1</sup>): 1600 (w), 1562 (vw), 1541 (vw), 1486 (vw), 1457 (vw), 1404 (w), 1386 (vw), 1364 (vw), 1327 (vw), 1297 (w), 1258 (vs), 1241 (s), 1235 (s), 1221 (s), 1149 (s), 1092 (w), 1070 (w), 1025 (vs), 958 (w), 904 (vw), 851 (vw), 831 (vw), 798 (w), 784 (w), 774 (w), 754 (w), 725 (vw), 686 (w), 665 (vw), 635 (vs), 607 (w), 573 (w), 550 (w), 538 (w), 516 (m), 474 (w), 450 (m), 434 (w), 412 (w); **<sup>1</sup>H NMR** (CD<sub>3</sub>CN, 298 K, in ppm) δ = 1.53 (6H, d, <sup>3</sup>J<sub>HH</sub> = 6.40 Hz, H5), 1.59 (6H, d, <sup>3</sup>J<sub>HH</sub> = 6.96 Hz, H5), 2.43 (6H, s, H3), 2.54 (3H, d, <sup>3</sup>J<sub>HH</sub> = 2.24 Hz, H10), 3.00 (3H, d, <sup>3</sup>J<sub>HH</sub> = 2.52 Hz, H9), 4.79 (1H, dd, <sup>2</sup>J<sub>HH</sub> = 18.64 Hz, <sup>3</sup>J<sub>HH</sub> = 3.17, H12), 4.97 (1H, dd, <sup>2</sup>J<sub>HH</sub> = 18.83 Hz, <sup>3</sup>J<sub>HH</sub> = 10.50, H12), 4.65 (2H, s(br), H4), 6.97 (1H, s, H7), 7.71 (2H, d, <sup>3</sup>J<sub>HH</sub> = 8.76, H14), 8.29 (2H, d, <sup>3</sup>J<sub>HH</sub> = 8.80, H15); **<sup>13</sup>C{<sup>1</sup>H} NMR** (CD<sub>3</sub>CN, 298 K, in ppm): δ = 10.66 (2C, s, C3), 12.81 (1C, s, C10), 13.23 (1C, s, C9), 20.24 (2C, s, C5), 20.85 (2C, s, C5), 37.78 (1C, d, <sup>3</sup>J<sub>CP</sub> = 5 Hz, C12), 53.64 (1C, s, C4), 53.78 (1C, s, C4), 118.40 (1C, d, <sup>3</sup>J<sub>CP</sub> = 4 Hz, C7), 121.06 (2C, q, <sup>1</sup>J<sub>CF</sub> = 320 Hz, OTf), 123.80 (2C, s, C15), 129.20 (1C, s(br), C1), 131.80 (2C, s, C14), 136.57 (2C, s, C2), 139.60 (1C, s, C16), 148.00 (1C, s, C13), 149.18 (1C, s(br), C6), 155.85 (1C, d, <sup>3</sup>J<sub>CP</sub> = 5 Hz, C8), 158.74 (1C, s, C11); **<sup>19</sup>F{<sup>1</sup>H} NMR** (CD<sub>3</sub>CN, 298 K, in ppm): δ = -79.2 (s); **<sup>31</sup>P{<sup>1</sup>H} NMR** (CD<sub>3</sub>CN, 298 K, in ppm): δ = 64.3 (s); **elemental analysis:** calculated for C<sub>25</sub>H<sub>31</sub>BrF<sub>6</sub>N<sub>5</sub>O<sub>6</sub>PS<sub>2</sub>: N 8.90, C 38.18, H 3.97, S 8.15; found: N 9.52, C 37.72, H 3.95, S 8.11.



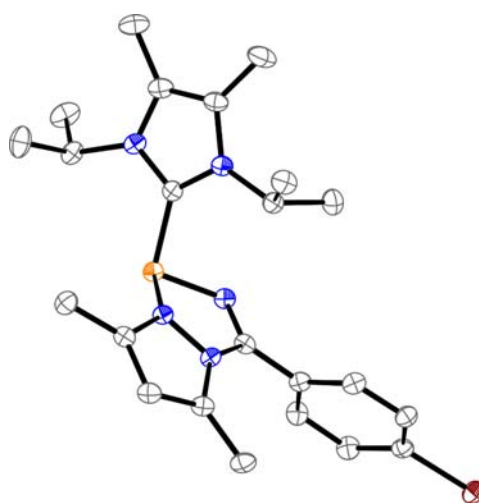

**Figure S 82:** Molecular structure of  $26c^{2+}$  in  $26c[OTf]_2 \cdot MeCN$ ; thermal ellipsoids are displayed at 50 % probability level, hydrogen atoms, solvate molecules and counterions are omitted for clarity.

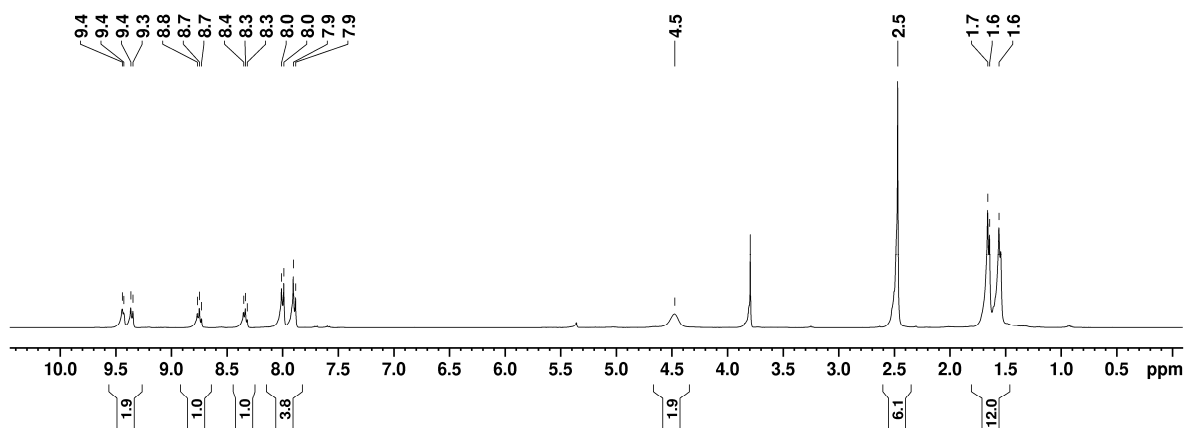

**Figure S 83:**  $^1H$  NMR spectrum of  $26c[OTf]_2$  in  $CD_3CN$ .

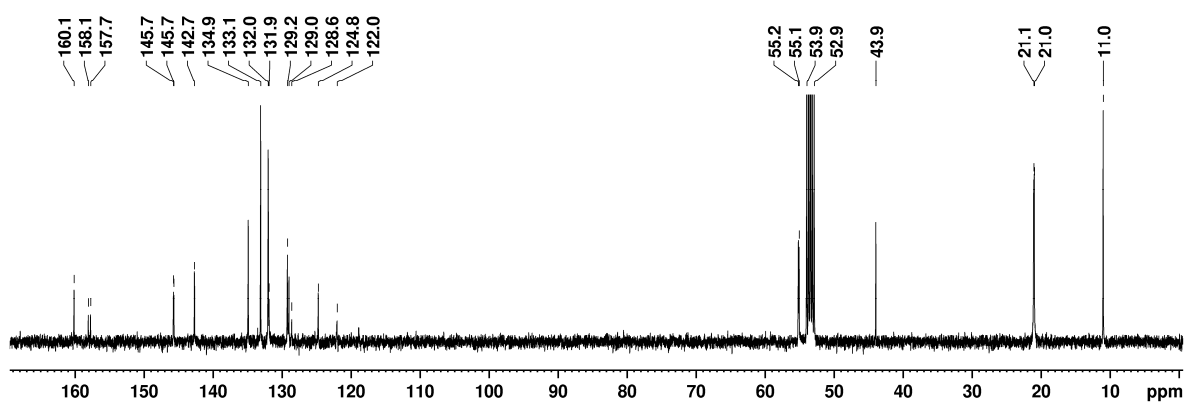

**Figure S 84:**  $^{13}C\{^1H\}$  NMR spectrum of  $26c[OTf]_2$  in  $CD_3CN$ .

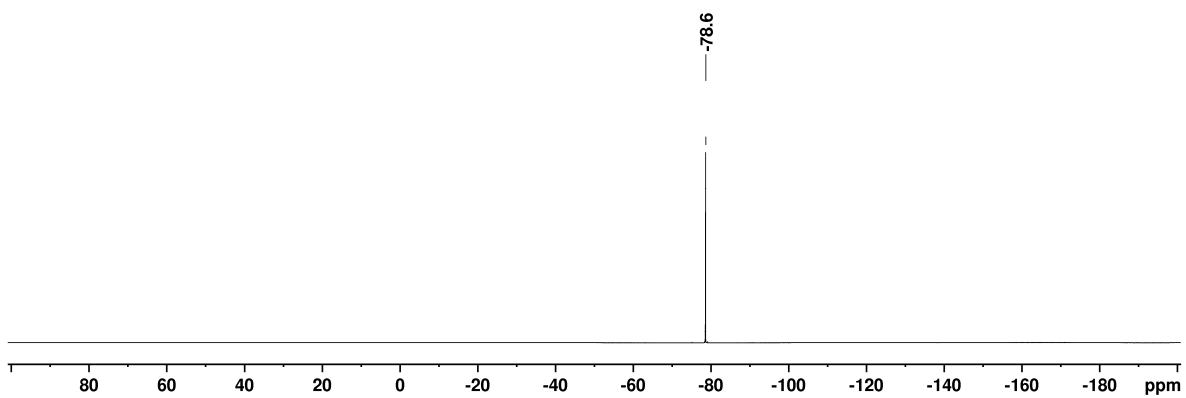

**Figure S 85:**  $^{19}\text{F}\{^1\text{H}\}$  NMR spectrum of **26c**[OTf] $_2$  in  $\text{CD}_3\text{CN}$ .

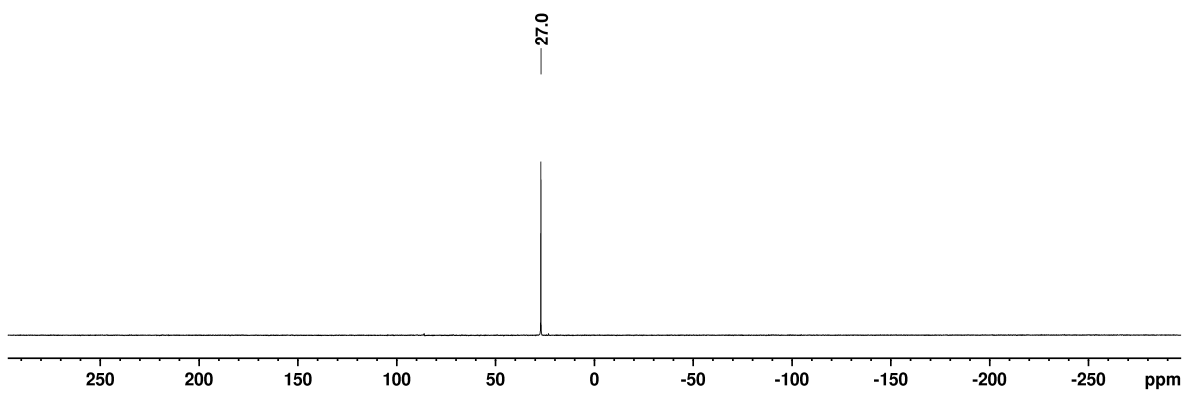

**Figure S 86:**  $^{31}\text{P}\{^1\text{H}\}$  NMR spectrum of **26c**[OTf] $_2$  in  $\text{CD}_3\text{CN}$ .

#### 2.6.4. Synthesis of **26d**[OTf]<sub>2</sub>

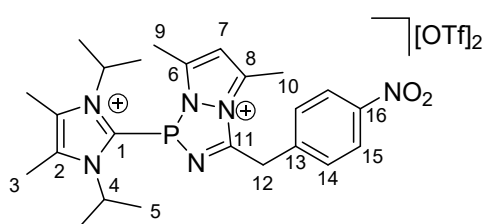

**22**[OTf] (60 mg, 0.139 mmol, 1.0 equiv.), **23**[OTf] (76.6 mg, 0.139 mmol, 1.0 equiv.) and silver triflate (78.6 mg, 0.306 mmol, 2.2 equiv.) are suspended in 3 mL of CH<sub>2</sub>Cl<sub>2</sub> and stirred for 2 h under exclusion of light. The resulting solid is filtered off and the solvent removed *in vacuo*. A solution of 4-nitrophenylacetonitrile (50 mg, 0.309

mmol, 2.2 equiv.) in 2 mL C<sub>6</sub>H<sub>5</sub>F is added and the mixture is stirred overnight. By filtration and washing with CH<sub>2</sub>Cl<sub>2</sub> and *n*-pentane, **26d**[OTf]<sub>2</sub> is obtained as a colorless, air and moisture sensitive solid.

**Yield:** 166 mg (78 %); **m.p.** 168 °C (decomp.); **Raman** (80 mW, 200 scans, 298 K, cm<sup>-1</sup>): 2995 (18), 2944 (29), 1603 (55), 1461 (47), 1404 (42), 1384 (42), 1352 (100), 1264 (52), 1112 (48), 1034 (57), 862 (43), 757 (42), 574 (41), 350 (39), 315 (39); **IR** (ATR, 298 K, cm<sup>-1</sup>): 1602 (vw), 1526 (vw), 1461 (vw), 1410 (vw), 1379 (vw), 1352 (w), 1256 (s), 1224 (w), 1149 (m), 1100 (w), 1029 (s), 840 (w), 795 (vw), 776 (vw), 753 (w), 636 (s), 571 (w), 540 (vw), 517 (w), 484 (vw), 440 (w); **<sup>1</sup>H NMR** (CD<sub>3</sub>CN, 298 K, in ppm)  $\delta$  = 1.53 (6H, d, <sup>3</sup>J<sub>HH</sub> = 6.40 Hz, H5), 1.59 (6H, d, <sup>3</sup>J<sub>HH</sub> = 6.96 Hz, H5), 2.43 (6H, s, H3), 2.54 (3H, d, <sup>3</sup>J<sub>HH</sub> = 2.24 Hz, H10), 3.00 (3H, d, <sup>3</sup>J<sub>HH</sub> = 2.52 Hz, H9), 4.79 (1H, dd, <sup>2</sup>J<sub>HH</sub> = 18.64 Hz, <sup>3</sup>J<sub>HH</sub> = 3.17, H12), 4.97 (1H, dd, <sup>2</sup>J<sub>HH</sub> = 18.83 Hz, <sup>3</sup>J<sub>HH</sub> = 10.50, H12), 4.65 (2H, s(br), H4), 6.97 (1H, s, H7), 7.71 (2H, d, <sup>3</sup>J<sub>HH</sub> = 8.76, H14), 8.29 (2H, d, <sup>3</sup>J<sub>HH</sub> = 8.80, H15); **<sup>13</sup>C{<sup>1</sup>H} NMR** (CD<sub>3</sub>CN, 298 K, in ppm):  $\delta$  = 10.66 (2C, s, C3), 12.81 (1C, s, C10), 13.23 (1C, s, C9), 20.24 (2C, s, C5), 20.85 (2C, s, C5), 37.78 (1C, d, <sup>3</sup>J<sub>CP</sub> = 5 Hz, C12), 53.64 (1C, s, C4), 53.78 (1C, s, C4), 118.40 (1C, d, <sup>3</sup>J<sub>CP</sub> = 4 Hz, C7), 121.06 (2C, q, <sup>1</sup>J<sub>CF</sub> = 320 Hz, OTf<sup>-</sup>), 123.80 (2C, s, C15), 129.20 (1C, s(br), C1), 131.80 (2C, s, C14), 136.57 (2C, s, C2), 139.60 (1C, s, C16), 148.00 (1C, s, C13), 149.18 (1C, s(br), C6), 155.85 (1C, d, <sup>3</sup>J<sub>CP</sub> = 5 Hz, C8), 158.74 (1C, s, C11); **<sup>19</sup>F{<sup>1</sup>H} NMR** (CD<sub>3</sub>CN, 298 K, in ppm):  $\delta$  = -79.2 (s); **<sup>31</sup>P{<sup>1</sup>H} NMR** (CD<sub>3</sub>CN, 298 K, in ppm):  $\delta$  = 64.3 (s); **elemental analysis:** calculated for C<sub>26</sub>H<sub>33</sub>F<sub>6</sub>N<sub>6</sub>O<sub>8</sub>PS<sub>2</sub>: N 10.96, C 40.73, H 4.34, S 8.36; found: N 10.97, C 40.92, H 4.15, S 8.78.

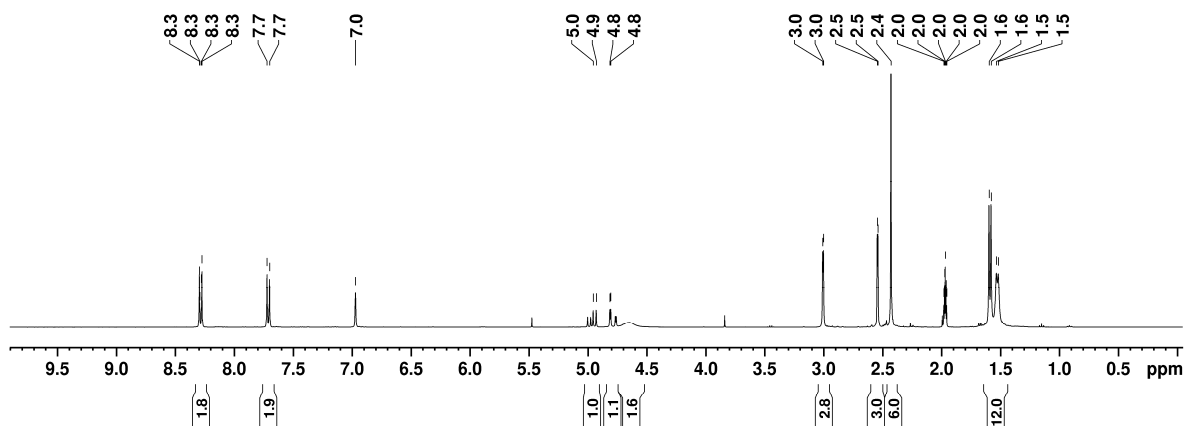

**Figure S 87:** <sup>1</sup>H NMR spectrum of **26d**[OTf]<sub>2</sub> in CD<sub>3</sub>CN.

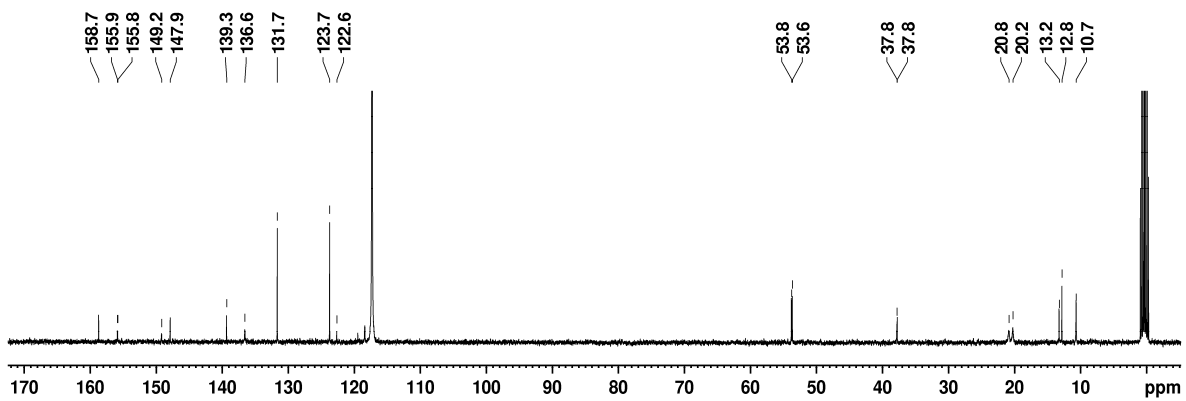

Figure S 88: <sup>13</sup>C{<sup>1</sup>H} NMR spectrum of 26d[OTf]<sub>2</sub> in CD<sub>3</sub>CN.

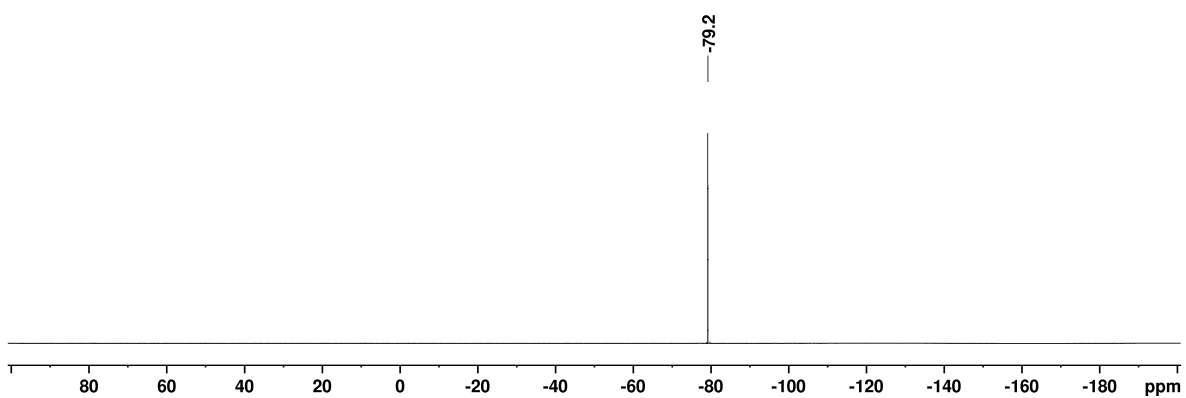

Figure S 89: <sup>19</sup>F{<sup>1</sup>H} NMR spectrum of 26d[OTf]<sub>2</sub> in CD<sub>3</sub>CN.

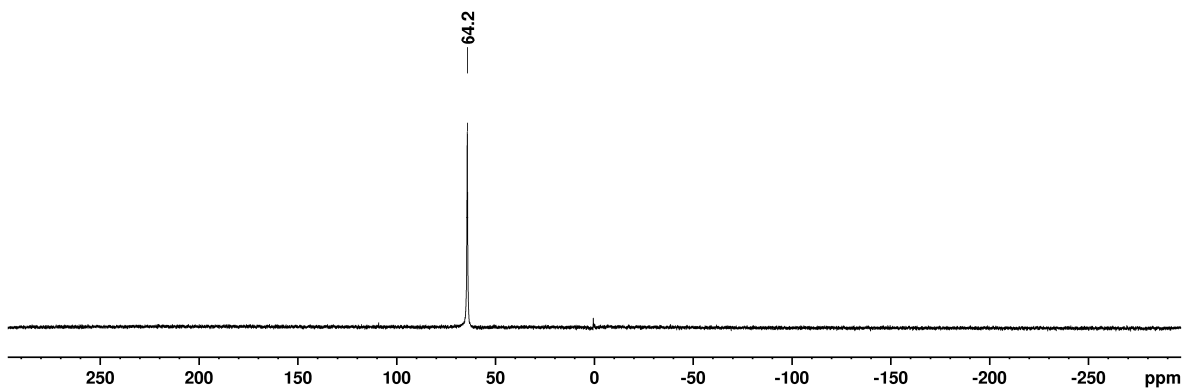

Figure S 90: <sup>31</sup>P{<sup>1</sup>H} NMR spectrum of 26d[OTf]<sub>2</sub> in CD<sub>3</sub>CN.

### 2.6.5. Synthesis of **26e**[OTf]<sub>2</sub>

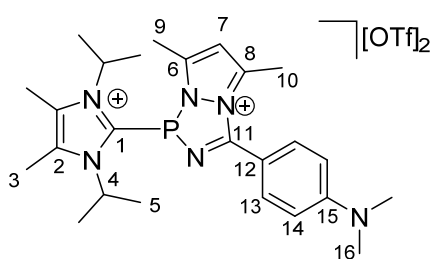

**22**[OTf] (60 mg, 0.139 mmol, 1.0 equiv.), **23**[OTf] (76.6 mg, 0.139 mmol, 1.0 equiv.) and silver triflate (78.6 mg, 0.306 mmol, 2.2 equiv.) are suspended in 3 mL of CH<sub>2</sub>Cl<sub>2</sub> and stirred for 2 h under exclusion of light. The resulting solid is filtered off and the solvent removed *in vacuo*. A solution of 4-(dimethylamino)benzonitrile (49 mg, 0.334 mmol, 2.4 equiv.) in 3.5 mL C<sub>6</sub>H<sub>5</sub>F is added and stirred overnight. By filtration and washing with C<sub>6</sub>H<sub>5</sub>F and *n*-pentane, **26e**[OTf]<sub>2</sub> is obtained as a colorless, air and moisture sensitive solid. Suitable crystals for X-ray diffraction analysis can be obtained by slow diffusion of Et<sub>2</sub>O to a CH<sub>3</sub>CN solution at -30 °C.

**Yield:** 194 mg (93 %); **m.p.** 134 °C (decomp.); **Raman** : No Raman spectrum of the sample could be obtained due to strong fluorescence of the sample; **IR** (ATR, 298 K, cm<sup>-1</sup>): 1602 (w), 1584 (m), 1546 (w), 1526 (m), 1494 (vw), 1448 (w), 1403 (w), 1377 (w), 1328 (vw), 1317 (vw), 1254 (vs), 1223 (s), 1197 (s), 1163 (s), 1151 (s), 1114 (w), 1088 (w), 1028 (vs), 956 (vw), 940 (w), 901 (vw), 830 (w), 804 (m), 789 (w), 767 (w), 755 (w), 736 (vw), 698 (vw), 635 (vs), 610 (vw), 573 (m), 546 (vw), 517 (m), 479 (m), 448 (m), 416 (w); **<sup>1</sup>H NMR** (CD<sub>2</sub>Cl<sub>2</sub>, 298 K, in ppm)  $\delta$  = 1.60 (6H, s (br), H5), 1.70 (6H, s (br), H5), 2.48 (6H, s, H3), 2.58 (3H, s, H10), 2.71 (3H, s, H9), 3.17 (6H, s, H16), 4.93 (2H, s (br), H4), 6.81 (1H, s, H7), 6.86 (2H, d, <sup>3</sup>J<sub>HH</sub> = 8.20 Hz, H14), 7.79 (2H, d, <sup>3</sup>J<sub>HH</sub> = 8.16 Hz, H13); **<sup>13</sup>C{<sup>1</sup>H} NMR** (CD<sub>2</sub>Cl<sub>2</sub>, 298 K, in ppm):  $\delta$  = 11.19 (2C, s, C3), 13.62 (1C, d, <sup>3</sup>J<sub>CP</sub> = 2 Hz, C9), 15.20 (1C, s, C10), 20.87-22.00 (4C, m, C5), 39.89 (2C, s, C16), 53.44 (2C, s, C4), 111.39 (2C, s, C14), 118.88 (1C, d, <sup>3</sup>J<sub>CP</sub> = 3 Hz, C7), 120.69 (2C, q, <sup>1</sup>J<sub>CF</sub> = 321 Hz, OTf-), 130.01 (1C, d, <sup>3</sup>J<sub>CP</sub> = 8 Hz, C12), 131.89 (2C, s, C13), 132.14 (1C, d, <sup>1</sup>J<sub>CP</sub> = 87 Hz, C1), 135.21 (2C, s, C2), 152.51 (1C, d, <sup>3</sup>J<sub>CP</sub> = 4 Hz, C8), 154.57 (1C, s, C15), 156.60 (1C, s, C11), 158.33 (1C, d, <sup>2</sup>J<sub>CP</sub> = 8 Hz, C6); **<sup>19</sup>F{<sup>1</sup>H} NMR** (CD<sub>2</sub>Cl<sub>2</sub>, 298 K, in ppm):  $\delta$  = -78.7 (s); **<sup>31</sup>P{<sup>1</sup>H} NMR** (CD<sub>2</sub>Cl<sub>2</sub>, 298 K, in ppm):  $\delta$  = 69.9 (s); **elemental analysis:** calculated for C<sub>27</sub>H<sub>38</sub>F<sub>6</sub>N<sub>6</sub>O<sub>6</sub>PS<sub>2</sub>: N 11.18, C 43.14, H 5.10, S 8.53; found: N 10.99, C 42.48, H 4.76, S 8.31.

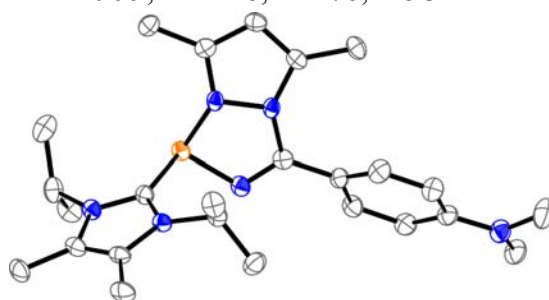

**Figure S 91:** Molecular structure of **26e**<sup>2+</sup> in **26e**[OTf]<sub>2</sub>·MeCN; thermal ellipsoids are displayed at 50 % probability level, hydrogen atoms, solvate molecules and counterions are omitted for clarity.

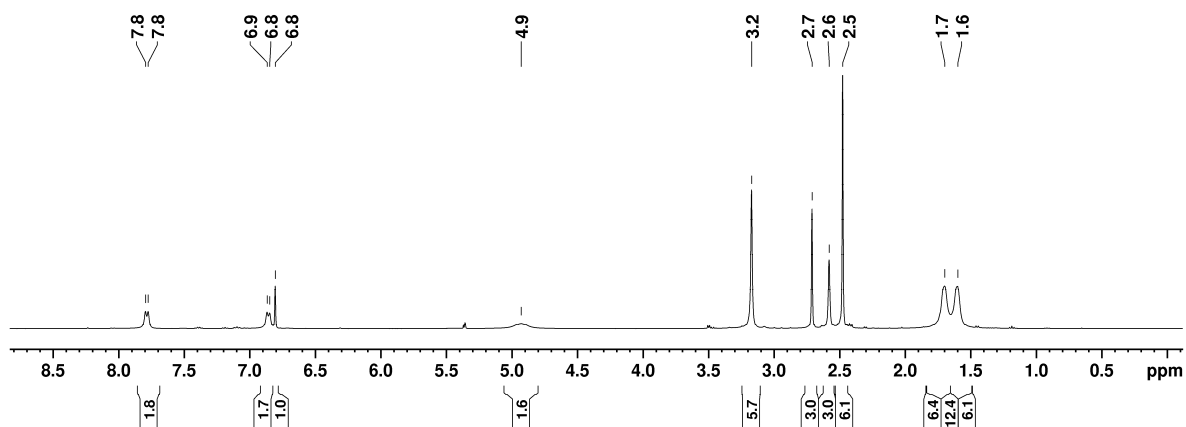

Figure S 92:  $^1\text{H}$  NMR spectrum of  $26\text{e}[\text{OTf}]_2$  in  $\text{CD}_2\text{Cl}_2$ .

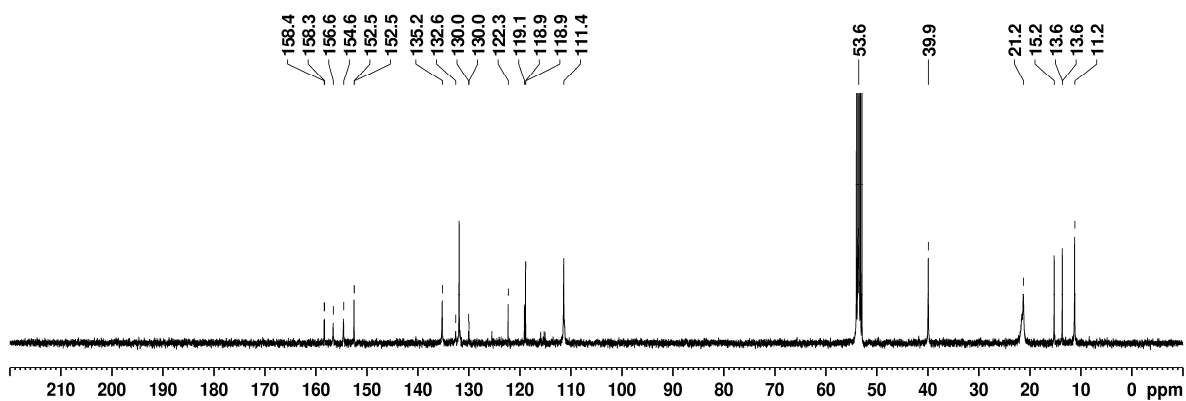

Figure S 93:  $^{13}\text{C}\{^1\text{H}\}$  NMR spectrum of  $26\text{e}[\text{OTf}]_2$  in  $\text{CD}_2\text{Cl}_2$ .

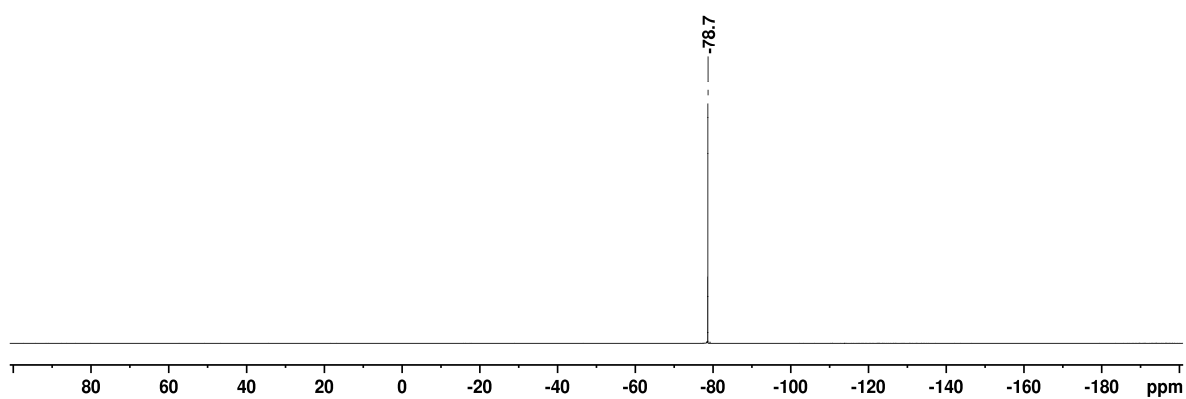

Figure S 94:  $^{19}\text{F}\{^1\text{H}\}$  NMR spectrum of  $26\text{e}[\text{OTf}]_2$  in  $\text{CD}_2\text{Cl}_2$ .

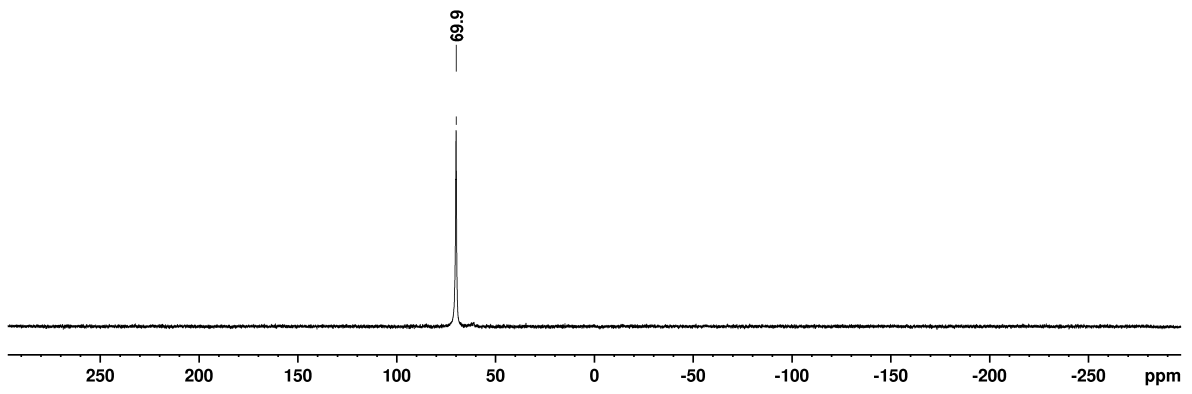

**Figure S 95:**  $^{31}\text{P}\{^1\text{H}\}$  NMR spectrum of  $26\text{e}[\text{OTf}]_2$  in  $\text{CD}_2\text{Cl}_2$ .

### 2.6.6. Synthesis of **26f**[OTf]<sub>4</sub>

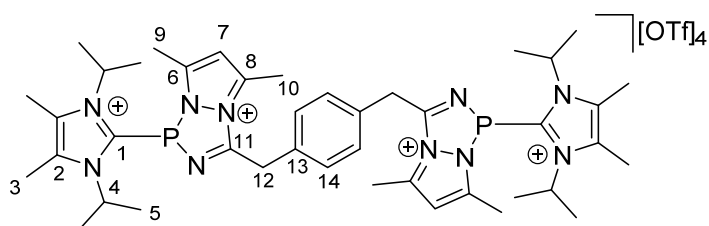

**22**[OTf] (60 mg, 0.139 mmol, 1.0 equiv.), **23**[OTf] (76.6 mg, 0.139 mmol, 1.0 equiv.) and silver triflate (78.6 mg, 0.306 mmol, 2.2 equiv.) are suspended in 3 mL of CH<sub>2</sub>Cl<sub>2</sub> and stirred for 2 h under exclusion of light.

The resulting solid is filtered off and the solvent removed *in vacuo*. A solution of 1,4-phenylenediacetonitrile (22 mg, 0.139 mmol, 1.0 equiv.) in 2 mL C<sub>6</sub>H<sub>5</sub>F is added and stirred for 2 d. By filtration and washing with CH<sub>2</sub>Cl<sub>2</sub> and *n*-pentane, **26f**[OTf]<sub>4</sub> is obtained as a colorless, air and moisture sensitive solid. Suitable crystals for X-ray diffraction analysis can be obtained by slow diffusion of Et<sub>2</sub>O to a CH<sub>3</sub>CN solution at -30 °C.

**Yield:** 107 mg (56 %); **m.p.** 202 °C; **Raman:** No Raman spectrum of the sample could be obtained due to strong fluorescence of the sample; **IR** (ATR, 298 K, cm<sup>-1</sup>): 1613 (w), 1544 (w), 1458 (vw), 1404 (w), 1329 (vw), 1256 (vs), 1224 (s), 1151 (s), 1111 (w), 1098 (w), 1090 (w), 1056 (vw), 1029 (vs), 999 (w), 901 (vw), 865 (vw), 826 (w), 809 (w), 793 (w), 768 (w), 753 (w), 636 (vs), 572 (m), 563 (w), 538 (w), 517 (m), 500 (m), 475 (w), 443 (m), 412 (w); **<sup>1</sup>H NMR** (CD<sub>3</sub>CN, 298 K, in ppm) δ = 1.47 – 1.64 (24H, m, H5), 2.42 – 2.45 (12H, m, H3), 2.53 (7H, s, H10), 2.99 (6H, s(br), H9), 4.54 – 4.87 (8H, m, H4/H12), 6.95 (2H, s, H7), 7.50 (4H, d, <sup>4</sup>J<sub>HH</sub> = 2.10 Hz, H14); **<sup>13</sup>C{<sup>1</sup>H} NMR** (CD<sub>3</sub>CN, 298 K, in ppm): δ = 10.66 (4C, s, C3), 12.78 (2C, s, C10), 13.32 (2C, s, C9), 19.81–21.31 (8C, m, C5), 37.81 (4C, d, <sup>3</sup>J<sub>CP</sub> = 5 Hz, C12), 53.65 (4C, d, <sup>3</sup>J<sub>CP</sub> = 14 Hz, C4), 118.33 (2C, s, C7), 121.12 (4C, q, <sup>1</sup>J<sub>CF</sub> = 321 Hz, OTf), 128.67 (2C, d, <sup>1</sup>J<sub>CP</sub> = 86 Hz, C1), 130.77 (4C, s, C14), 131.76 (4C, s, C13), 136.54 (4C, s, C2), 149.24 (2C, s, C6), 155.62 (2C, s, C8), 159.74 (2C, d, <sup>2</sup>J<sub>CP</sub> = 3 Hz, C11); **<sup>19</sup>F{<sup>1</sup>H} NMR** (CD<sub>3</sub>CN, 298 K, in ppm): δ = -79.2 (s); **<sup>31</sup>P{<sup>1</sup>H} NMR** (CD<sub>3</sub>CN, 298 K, in ppm): δ = 64.0 (s); **elemental analysis:** calculated for C<sub>46</sub>H<sub>62</sub>F<sub>12</sub>N<sub>10</sub>O<sub>12</sub>P<sub>2</sub>S<sub>4</sub>: N 10.26, C 40.47, H 4.58, S 9.39; found: N 10.37, C 40.25, H 4.76, S 9.31.

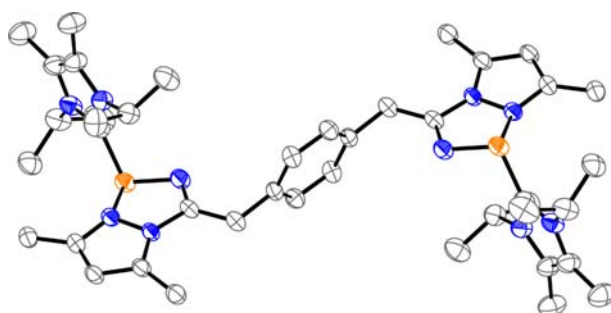

**Figure S 96:** Molecular structure of **26f**<sup>4+</sup> in **26f**[OTf]<sub>4</sub>; thermal ellipsoids are displayed at 50 % probability level, hydrogen atoms and counterions are omitted for clarity.



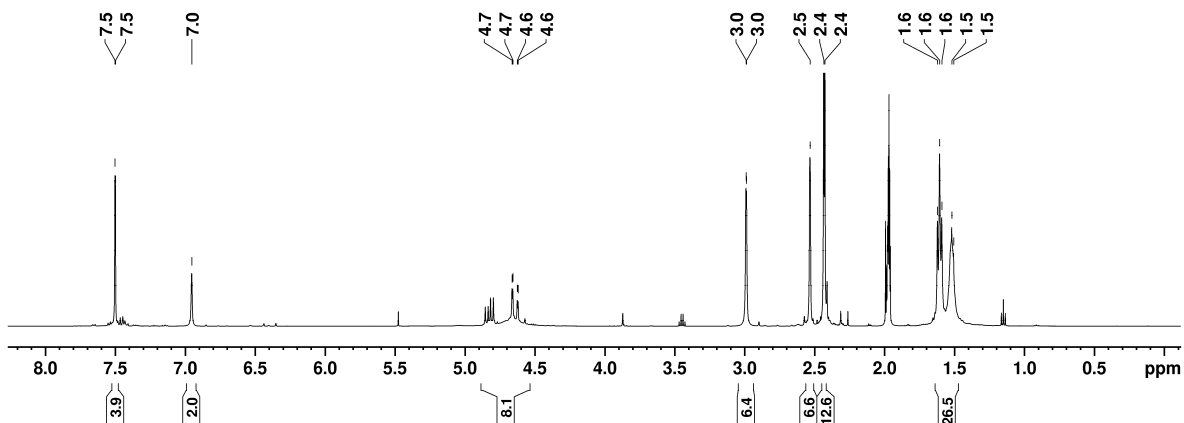

**Figure S 97:**  $^1\text{H}$  NMR spectrum of  $26\text{f}[\text{OTf}]_4$  in  $\text{CD}_3\text{CN}$ .

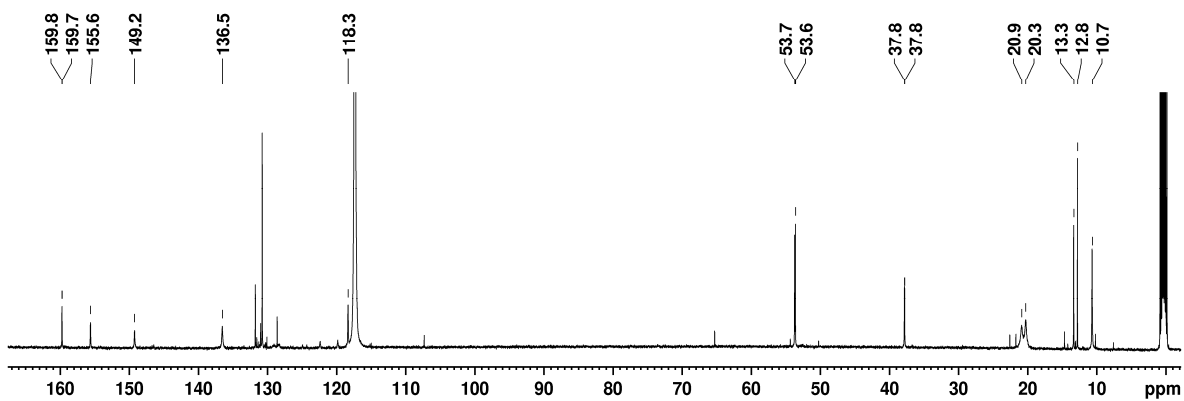

**Figure S 98:**  $^{13}\text{C}\{^1\text{H}\}$  NMR spectrum of  $26\text{f}[\text{OTf}]_4$  in  $\text{CD}_3\text{CN}$ .

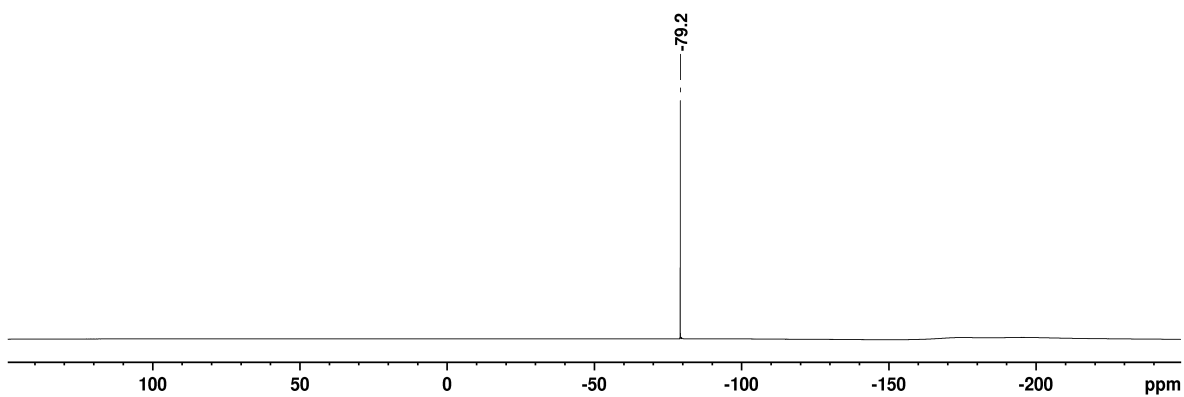

**Figure S 99:**  $^{19}\text{F}\{^1\text{H}\}$  NMR spectrum of  $26\text{f}[\text{OTf}]_4$  in  $\text{CD}_3\text{CN}$ .

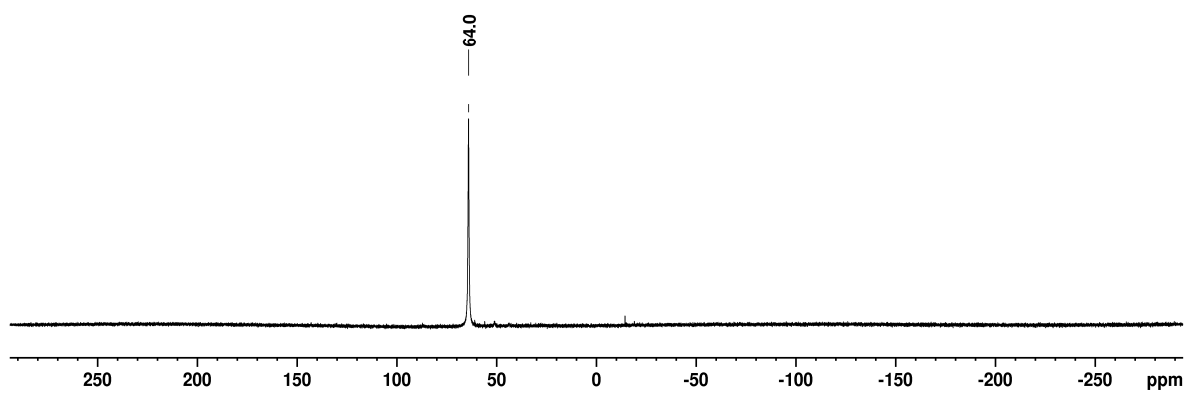

**Figure S 100:**  $^{31}\text{P}\{^1\text{H}\}$  NMR spectrum of **26f**[OTf]<sub>4</sub> in CD<sub>3</sub>CN.

## 2.7. Additional Cycloadditions of 24[OTf]

### 2.7.1. Synthesis of 27[OTf]

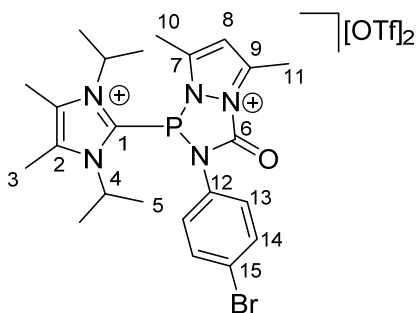

**22[OTf]** (60 mg, 0.139 mmol, 1.0 equiv.), **23[OTf]** (76.6 mg, 0.139 mmol, 1.0 equiv.) and silver triflate (78.6 mg, 0.306 mmol, 2.2 equiv.) are suspended in 3 mL of CH<sub>2</sub>Cl<sub>2</sub> and stirred for 2 h under exclusion of light. The resulting solid is filtered off and the solvent removed *in vacuo*. A solution of 4-bromophenylisocyanate (82.6 mg, 0.417 mmol, 3.0 equiv.) in 2 mL CH<sub>2</sub>Cl<sub>2</sub> is added and the mixture is heated to 70 °C in a microwave oven for 1 h. After the addition of *n*-pentane, a colorless solid forms. The solid is recrystallized from CH<sub>2</sub>Cl<sub>2</sub> and *n*-pentane to afford **27[OTf]<sub>2</sub>** as a colorless, air and moisture sensitive solid. Suitable crystals for X-ray diffraction analysis can be obtained by slow diffusion of *n*-pentane to a CH<sub>2</sub>Cl<sub>2</sub> solution at -30 °C.

The solid is recrystallized from CH<sub>2</sub>Cl<sub>2</sub> and *n*-pentane to afford **27[OTf]<sub>2</sub>** as a colorless, air and moisture sensitive solid. Suitable crystals for X-ray diffraction analysis can be obtained by slow diffusion of *n*-pentane to a CH<sub>2</sub>Cl<sub>2</sub> solution at -30 °C.

**Yield:** 100 mg (67 %); **m.p.** 160 °C (decomposition); **Raman** (200 mW, 500 scans, 298 K, cm<sup>-1</sup>): 3075 (20), 2987 (31), 2941 (100), 2888 (15), 2875 (16), 1791 (22), 1585 (51), 1544 (15), 1464 (29), 1385 (20), 1342 (11), 1295 (25), 1248 (38), 1088 (15), 1032 (62), 881 (11), 755 (22), 680 (13), 586 (27), 572 (18), 519 (9), 347 (18), 313 (16), 177 (31); **IR** (ATR, 298 K, cm<sup>-1</sup>): 2940 (vw), 1787 (w), 1592 (vw), 1543 (vw), 1489 (vw), 1463 (w), 1398 (w), 1381 (w), 1341 (w), 1246 (vs), 1222 (s), 1152 (s), 1108 (m), 1089 (m), 1072 (w), 1027 (vs), 900 (vw), 839 (w), 807 (w), 789 (w), 755 (w), 737 (vw), 717 (w), 704 (vw), 666 (vw), 635 (vs), 590 (m), 573 (m), 548 (w), 515 (s), 480 (m), 449 (m); **<sup>1</sup>H NMR** (CD<sub>2</sub>Cl<sub>2</sub>, 298 K, in ppm)  $\delta$  = 1.41-1.82 (12H, s, H5), 2.53 (6H, s, H3), 2.76 (3H, s, H11), 2.96 (3H, s, H10), 4.91 (2H, s (br., FWHM = 75 Hz), H4), 6.90 (1H, s, H8), 7.38-7.45 (2H, m, H13), 7.70-7.76 (2H, m, H14); **<sup>13</sup>C{<sup>1</sup>H} NMR** (CD<sub>2</sub>Cl<sub>2</sub>, 298 K, in ppm):  $\delta$  = 11.61 (2C, s, C3), 12.20 (1C, s, C10), 12.87 (1C, s, C11), 21.49 (4C, s(br.), C5), 53.88 (2C, s, C4), 116.92 (1C, s, C8), 120.53 (2C, q, <sup>1</sup>J<sub>CF</sub> = 320 Hz, OTf), 124.69 (1C, s, C15), 128.34 (2C, s, C13), 130.49 (1C, d, <sup>2</sup>J<sub>CP</sub> = 15 Hz, C12), 131.41 (1C, d, <sup>1</sup>J<sub>CP</sub> = 101 Hz, C1), 134.00 (2C, s, C14), 138.03 (2C, s, C2), 143.00 (1C, s, C6), 154.89 (1C, s, C7), 159.05 (1C, d, <sup>2</sup>J<sub>CP</sub> = 9 Hz, C9); **<sup>19</sup>F{<sup>1</sup>H} NMR** (CD<sub>2</sub>Cl<sub>2</sub>, 298 K, in ppm):  $\delta$  = -78.8 (s); **<sup>31</sup>P{<sup>1</sup>H} NMR** (CD<sub>2</sub>Cl<sub>2</sub>, 298 K, in ppm):  $\delta$  = 48.0 (s); **elemental analysis:** calculated for C<sub>25</sub>H<sub>31</sub>BrF<sub>6</sub>N<sub>5</sub>O<sub>7</sub>PS<sub>2</sub> · MeCN · 3 CH<sub>2</sub>Cl<sub>2</sub>: N 7.65, C 32.81, H 3.67, S 5.84; found: N 8.07, C 32.35, H 4.10. We found repeatable inconclusive results for the sulphur value in the elemental analysis of this compound and therefore abstain of any further analysis.

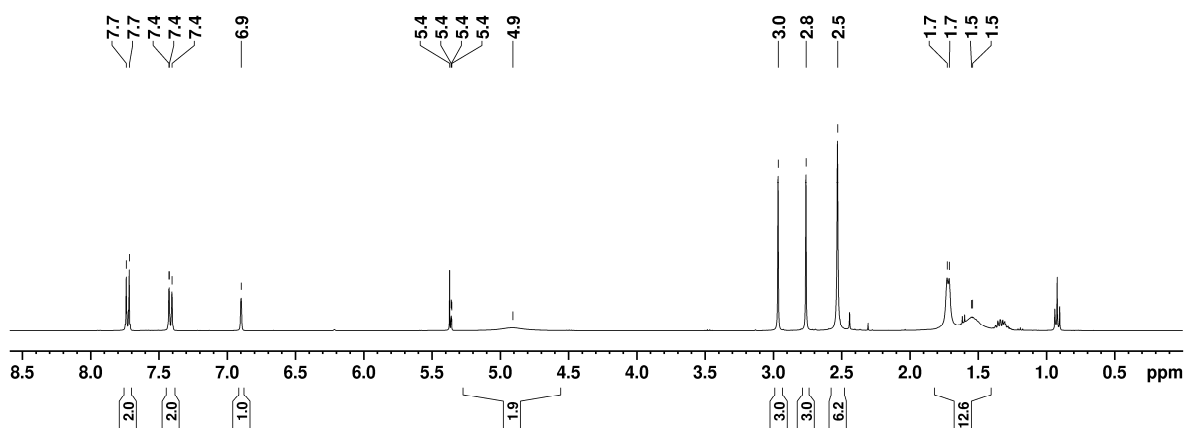

**Figure S 101:**  $^1\text{H}$  NMR spectrum of  $27[\text{OTf}]_2$  in  $\text{CD}_2\text{Cl}_2$ .

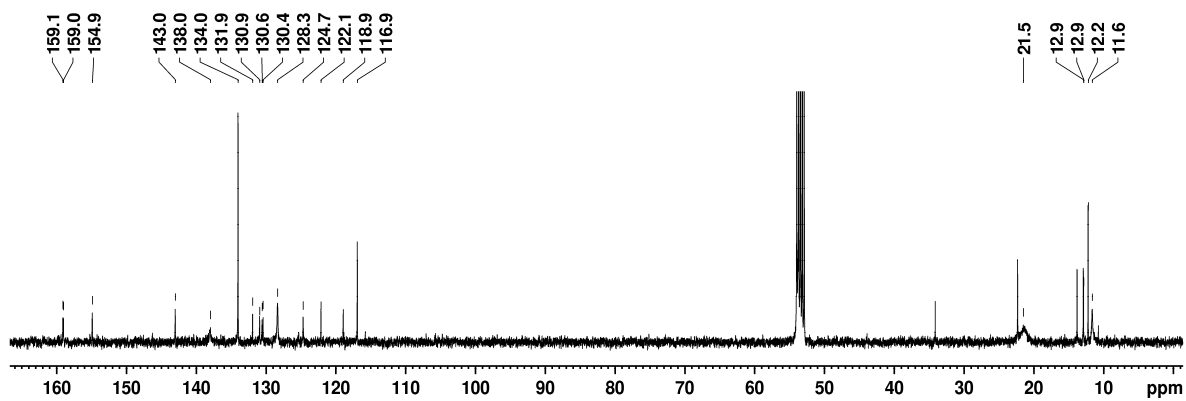

**Figure S 102:**  $^{13}\text{C}\{^1\text{H}\}$  NMR spectrum of  $27[\text{OTf}]_2$  in  $\text{CD}_2\text{Cl}_2$ .

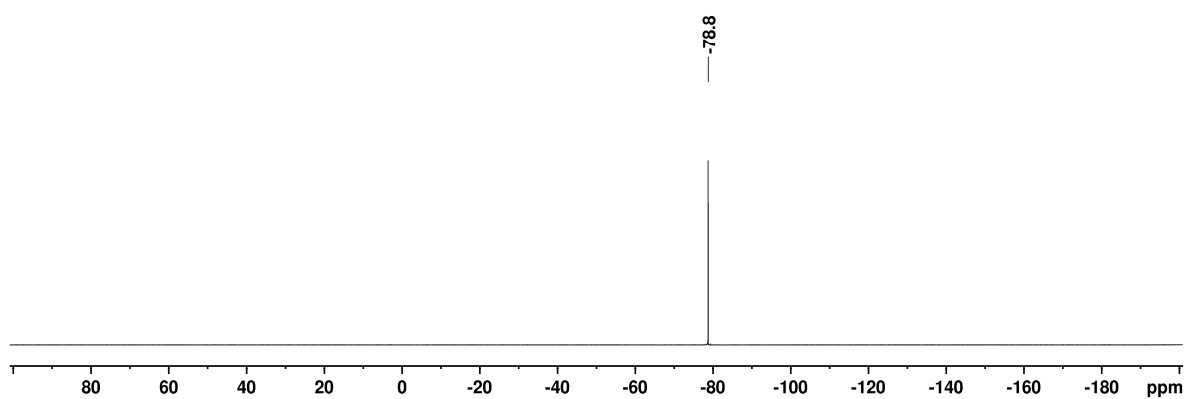

**Figure S 103:**  $^{19}\text{F}\{^1\text{H}\}$  NMR spectrum of  $27[\text{OTf}]_2$  in  $\text{CD}_2\text{Cl}_2$ .

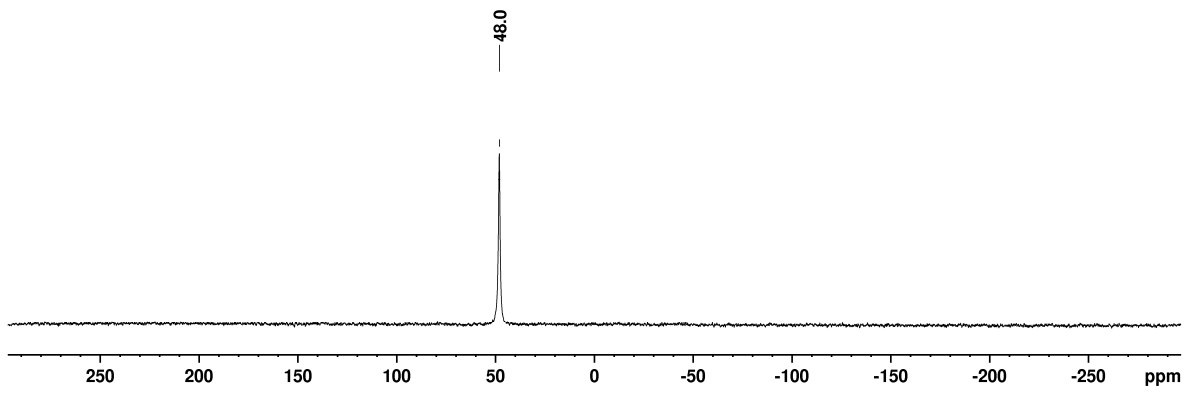

**Figure S 104:**  $^{31}\text{P}\{^1\text{H}\}$  NMR spectrum of  $27[\text{OTf}]_2$  in  $\text{CD}_2\text{Cl}_2$ .

### 2.7.2. Synthesis of **28**[OTf]

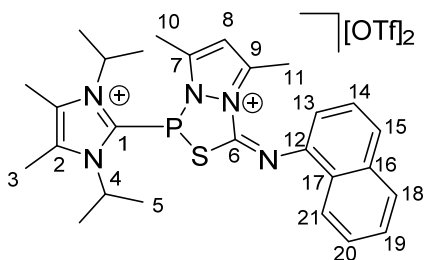

**22**[OTf] (60 mg, 0.139 mmol, 1.0 equiv.), **23**[OTf] (76.6 mg, 0.139 mmol, 1.0 equiv.) and silver triflate (78.6 mg, 0.306 mmol, 2.2 equiv.) are suspended in 3 mL of CH<sub>2</sub>Cl<sub>2</sub> and stirred for 2 h under exclusion of light. The resulting solid is filtered off and the solvent removed *in vacuo*. A solution of 1-naphthylisothiocyanate (109 mg, 0.556 mmol, 4.0 equiv.) in 4 mL C<sub>6</sub>H<sub>5</sub>F is added and the mixture is stirred for 64 h at room temperature. The formed suspension is filtered and the obtained solid is recrystallized from CH<sub>2</sub>Cl<sub>2</sub> and *n*-pentane to afford **28**[OTf]<sub>2</sub> as a pale yellow, air and moisture sensitive solid. Suitable crystals for X-ray diffraction analysis can be obtained by slow diffusion of *n*-pentane to a CH<sub>2</sub>Cl<sub>2</sub> solution at -30 °C.

**Yield:** 147 mg (67 %); **m.p.** 167 °C (decomposition); **Raman** (100 mW, 500 scans, 298 K, cm<sup>-1</sup>): 3064 (10), 2999 (13), 2945 (21), 2749 (10), 2306 (13), 2265 (13), 2245 (13), 2221 (13), 2207 (13), 2184 (13), 2158 (13), 2112 (14), 2061 (14), 1648 (99), 1642 (100), 1604 (30), 1573 (97), 1509 (41), 1457 (38), 1438 (34), 1397 (41), 1378 (69), 1342 (36), 1262 (39), 1226 (50), 1151 (28), 1080 (34), 1047 (27), 1033 (38), 1022 (34), 925 (23), 883 (25), 816 (25), 792 (25), 755 (31), 716 (27), 697 (23), 666 (24), 625 (26), 589 (31), 573 (29), 547 (32), 530 (41), 514 (38), 488 (29), 457 (31), 411 (27); **IR** (ATR, 298 K, cm<sup>-1</sup>): 1640 (vw), 1603 (vw), 1588 (vw), 1576 (vw), 1546 (vw), 1455 (vw), 1410 (w), 1398 (vw), 1380 (w), 1359 (vw), 1337 (vw), 1304 (w), 1264 (vs), 1233 (s), 1219 (vs), 1186 (w), 1151 (s), 1082 (m), 1031 (s), 1020 (vs), 981 (vw), 925 (w), 904 (w), 882 (vw), 832 (w), 810 (m), 790 (m), 754 (w), 634 (vs), 590 (w), 572 (m), 548 (w), 516 (s), 487 (w), 473 (w), 436 (w), 411 (w); **<sup>1</sup>H NMR** (CD<sub>2</sub>Cl<sub>2</sub>, 298 K, in ppm)  $\delta$  = 1.60 (13H, *pseudo t*, <sup>3</sup>*J*<sub>HH</sub> = 7.05 Hz, H5), 2.45 (6H, s, H3), 2.74 (3H, d, <sup>4</sup>*J*<sub>PH</sub> = 1.55 Hz, H11), 3.10 (3H, d, <sup>5</sup>*J*<sub>HP</sub> = 1.16 Hz, H10), 5.22-5.38 (2H, m, H4), 6.93 (1H, s, H8), 7.30 (1H, d, <sup>3</sup>*J*<sub>HH</sub> = 7.32 Hz, Naphthyl), 7.61 (3H, m, Naphthyl), 7.93 (3H, m, Naphthyl); **<sup>13</sup>C{<sup>1</sup>H} NMR** (CD<sub>2</sub>Cl<sub>2</sub>, 298 K, in ppm):  $\delta$  = 11.29 (2C, s, C3), 13.53 (1C, d, <sup>3</sup>*J*<sub>CP</sub> = 8 Hz, C11), 14.82 (1C, s, C10), 13.53 (2C, s, C5), 21.14 (2C, s, C5), 53.52 (2C, s, C4), 114.77 (1C, s, Naphthyl), 117.50 (1C, d, <sup>3</sup>*J*<sub>CP</sub> = 1 Hz, C8), 120.40 (2C, q, <sup>1</sup>*J*<sub>CF</sub> = 321 Hz, OTf-), 122.24 (1C, s, Naphthyl), 125.53 (1C, s, Naphthyl), 126.91 (1C, s, Naphthyl), 127.13 (1C, s, Naphthyl), 127.44 (1C, s, Naphthyl), 128.32 (1C, s, Naphthyl), 128.47 (1C, s, Naphthyl), 133.76 (1C, d, <sup>1</sup>*J*<sub>CP</sub> = 104 Hz, C1), 134.35 (1C, s, Naphthyl), 135.26 (1C, s, C2), 141.98 (1C, s, Naphthyl), 142.59 (1C, d, <sup>2</sup>*J*<sub>CP</sub> = 2 Hz, C6), 151.75 (1C, d, <sup>3</sup>*J*<sub>CP</sub> = 2 Hz, C7), 156.19 (1C, d, <sup>2</sup>*J*<sub>CP</sub> = 10 Hz, C9); **<sup>19</sup>F{<sup>1</sup>H} NMR** (CD<sub>2</sub>Cl<sub>2</sub>, 298 K, in ppm):  $\delta$  = -78.8 (s); **<sup>31</sup>P{<sup>1</sup>H} NMR** (CD<sub>2</sub>Cl<sub>2</sub>, 298 K, in ppm):  $\delta$  = 25.6 (s); **elemental analysis:** calculated for C<sub>29</sub>H<sub>34</sub>F<sub>6</sub>N<sub>5</sub>O<sub>6</sub>PS<sub>3</sub> · 1 MeCN · 1.5 CH<sub>2</sub>Cl<sub>2</sub>: N 8.77, C 40.74, H 4.21, S 10.04; found: N 8.45, C 40.57, H 4.87. We found repeatable inconclusive results for the sulphur value in the elemental analysis of this compound and therefore abstain of any further analysis.

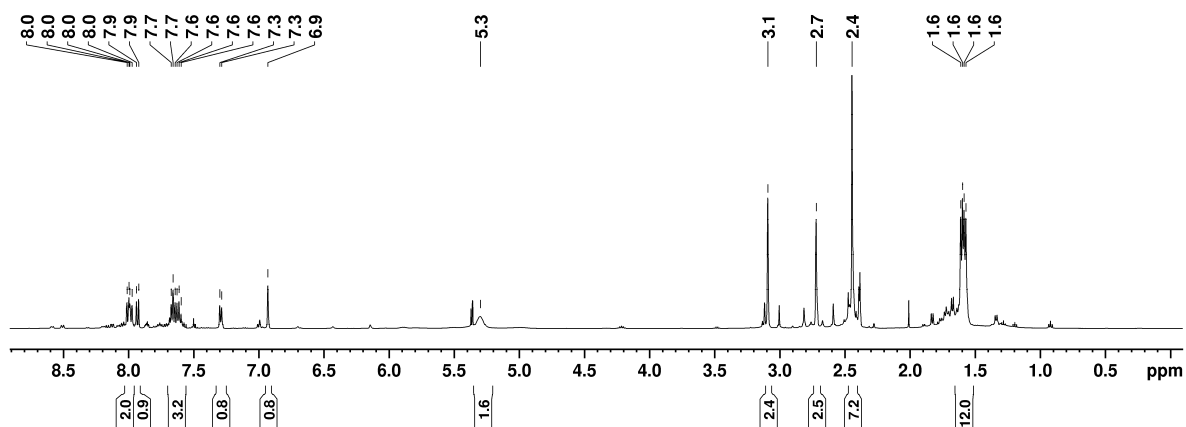

Figure S 105:  $^1\text{H}$  NMR spectrum of  $28[\text{OTf}]_2$  in  $\text{CD}_2\text{Cl}_2$ .

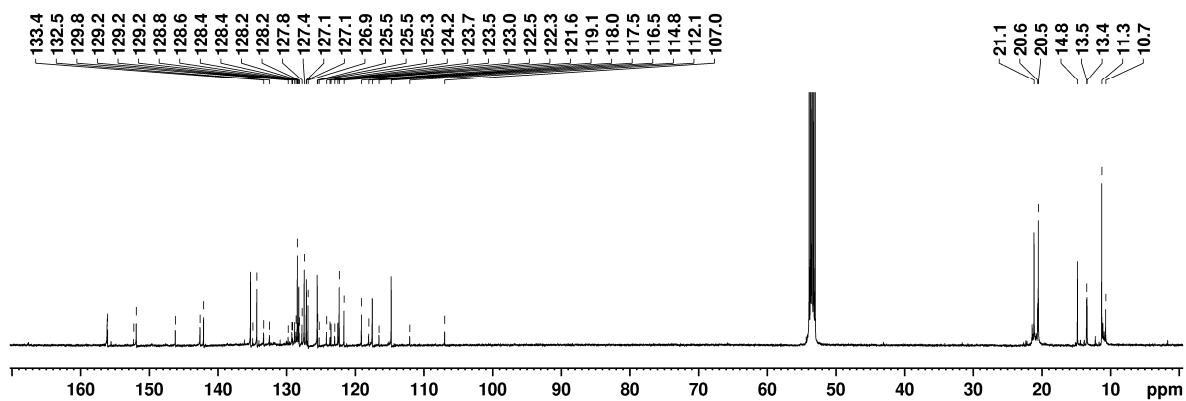

Figure S 106:  $^{13}\text{C}\{^1\text{H}\}$  NMR spectrum of  $28[\text{OTf}]_2$  in  $\text{CD}_2\text{Cl}_2$ .

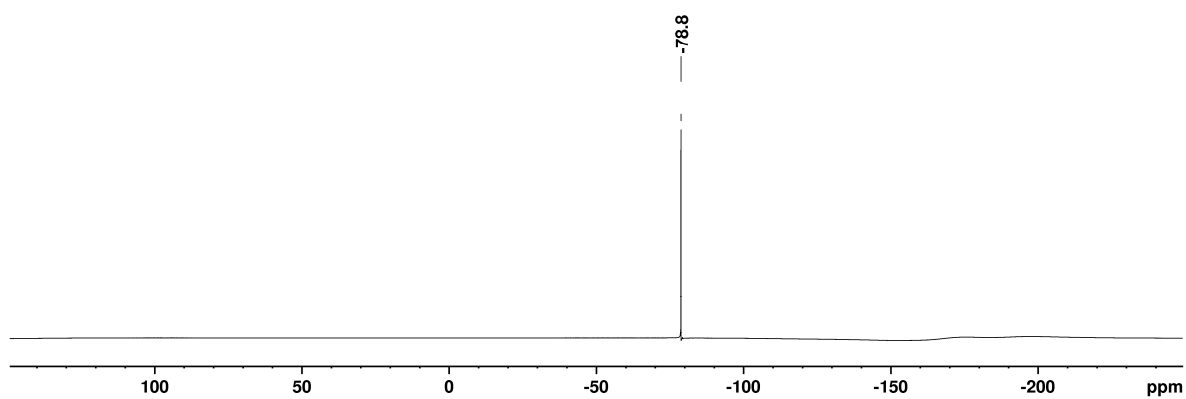

Figure S 107:  $^{19}\text{F}\{^1\text{H}\}$  NMR spectrum of  $28[\text{OTf}]_2$  in  $\text{CD}_2\text{Cl}_2$ .

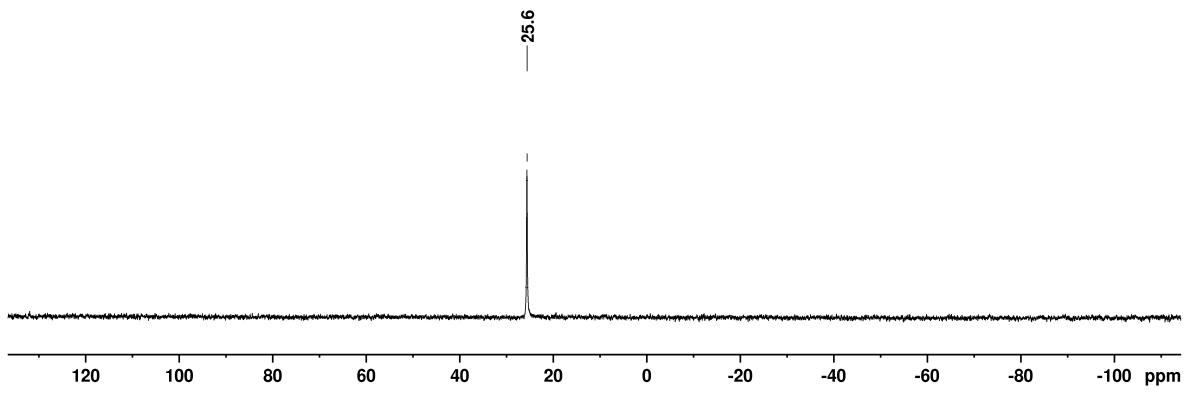

**Figure S 108:**  $^{31}\text{P}\{^1\text{H}\}$  NMR spectrum of **28**[OTf]<sub>2</sub> in CD<sub>2</sub>Cl<sub>2</sub>.



## 2.8. Additional Experiments

### 2.8.1. Comparison of reducing agents

**9g**[OTf]<sub>2</sub> (50 mg, 0.07 mmol, 1.0 equiv.) and the corresponding reducing agent KC<sub>8</sub> (21 mg, 0.15 mmol, 2.1 equiv) or Zn (13 mg, 0.2 mmol, excess) are cooled to -40 °C and cold THF (-40 °C, 2 mL) is added. The corresponding reaction mixture is slowly thawed to room temperature overnight. An aliquot was taken from each of the reaction mixtures for the NMR investigation.

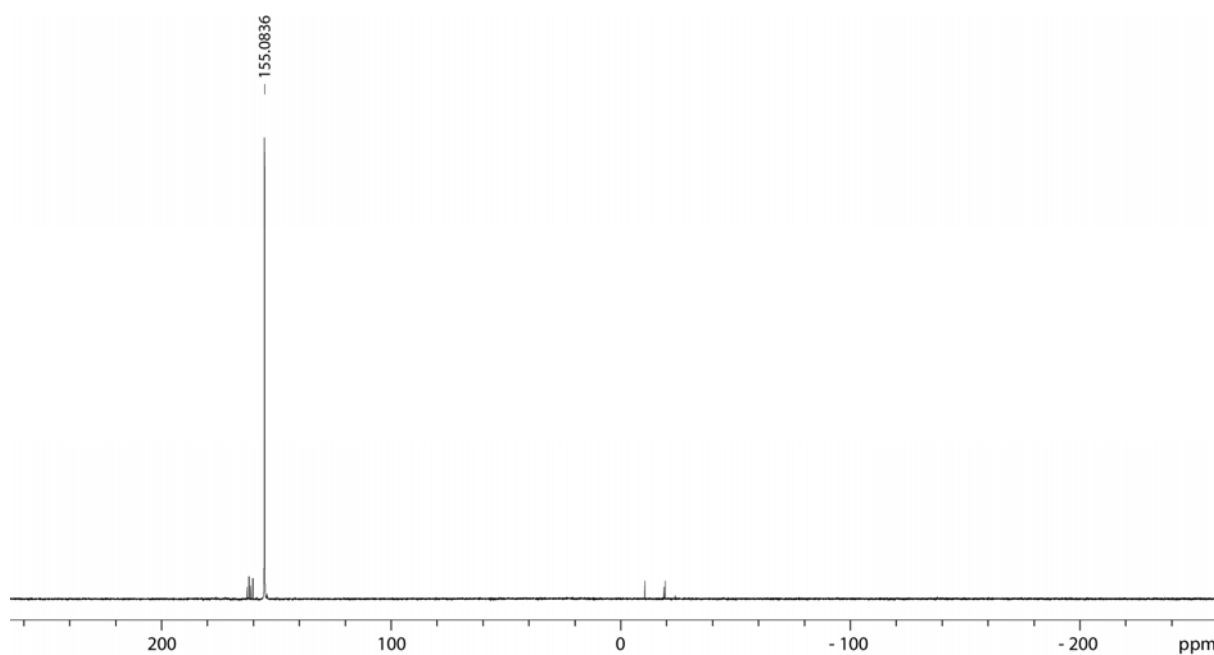

**Figure S 109:** <sup>31</sup>P NMR spectrum of the reaction of **9g**[OTf]<sub>2</sub> with KC<sub>8</sub> in THF (300 K, C<sub>6</sub>D<sub>6</sub> ref.)

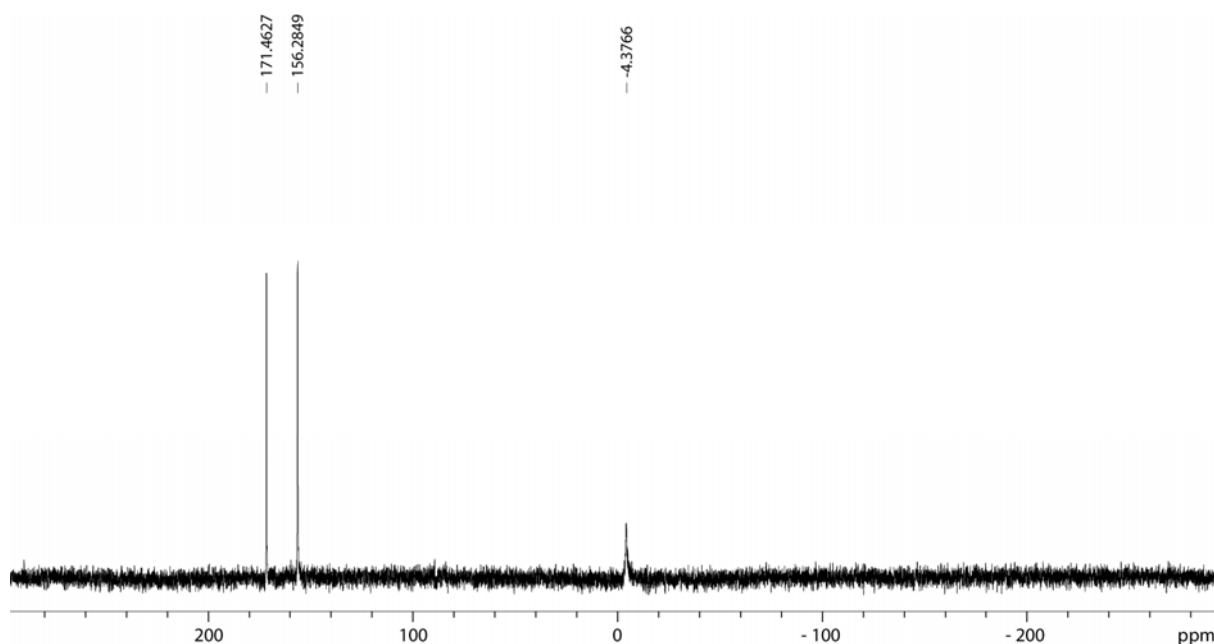

**Figure S110:**  $^{31}\text{P}$  NMR spectrum of the reaction of **9g**[OTf]<sub>2</sub> with Zn in THF (300 K, C<sub>6</sub>D<sub>6</sub> ref.)

### 2.8.2. Scope of Dipolarophiles

During the investigations numerous dipolarophiles were tested in the [3+2]-cycloaddition reaction with triflatophosphane **6**[OTf]. In the following table reaction conditions and outcome of small scale test-reactions are given. The reactions were conducted by mixing **11**[OTf] (50 mg, 0.105 mmol, 1 equiv.) with AgOTf (27 mg, 0.105 mmol, 1 equiv.) with 1.1 equiv of dipolarophile in CH<sub>2</sub>Cl<sub>2</sub>. It should be noted, that despite a positive outcome of the reaction, judged by  $^{31}\text{P}$  NMR, none of the products could be successfully isolated to date.

**Table S 1:** Scope of investigated dipolarophiles.

| Dipolarophile               | Conditions                               | Outcome             |
|-----------------------------|------------------------------------------|---------------------|
| N,1,1-triphenylmethanimine  | Stirred at r.t. over night               | No reaction         |
| CO <sub>2</sub>             | J-Young NMR tube, 2 bar, r.t. over night | No reaction         |
| CS <sub>2</sub>             | Stirred at r.t. over night               | No reaction         |
| NaOCP                       | Added in THF, stirred at r.t. over night | Mixture of products |
| tBu-C≡P (in HMDS)           | Stirred at r.t. over night               | Mixture of products |
| 1-isothiocyanatonaphthalene | Stirred at r.t. over night               | Mixture of products |
| ethynyltrimethylsilane      | Stirred at r.t. over night               | Mixture of products |

### 2.8.3. Electrochemical Investigation of **9a**[OTf]<sub>2</sub>

The first scan of the CV (**Figure S 110**, dashed black line) shows a non-reversible reduction process of the substrate at  $E_p = -0.86$  V (vs.  $E_{1/2}(\text{Cp}_2\text{Fe}/\text{Cp}_2\text{Fe}^+)$ ) and an additional process at  $E_p = -1.95$  V (vs.  $E_{1/2}(\text{Cp}_2\text{Fe}/\text{Cp}_2\text{Fe}^+)$ ). The SWV measurement of the compound reveals its formal potential of  $E = -0.80$  V (vs.  $E_{1/2}(\text{Cp}_2\text{Fe}/\text{Cp}_2\text{Fe}^+)$ ). Interestingly, the second scan CV (**Figure S 110**, black line) shows an oxidation process at  $E_p = 0.44$  V (vs.  $E_{1/2}(\text{Cp}_2\text{Fe}/\text{Cp}_2\text{Fe}^+)$ ), which is only observed after the previous reduction. These observations are similar to our previous findings (cf. Ref. <sup>1</sup>).

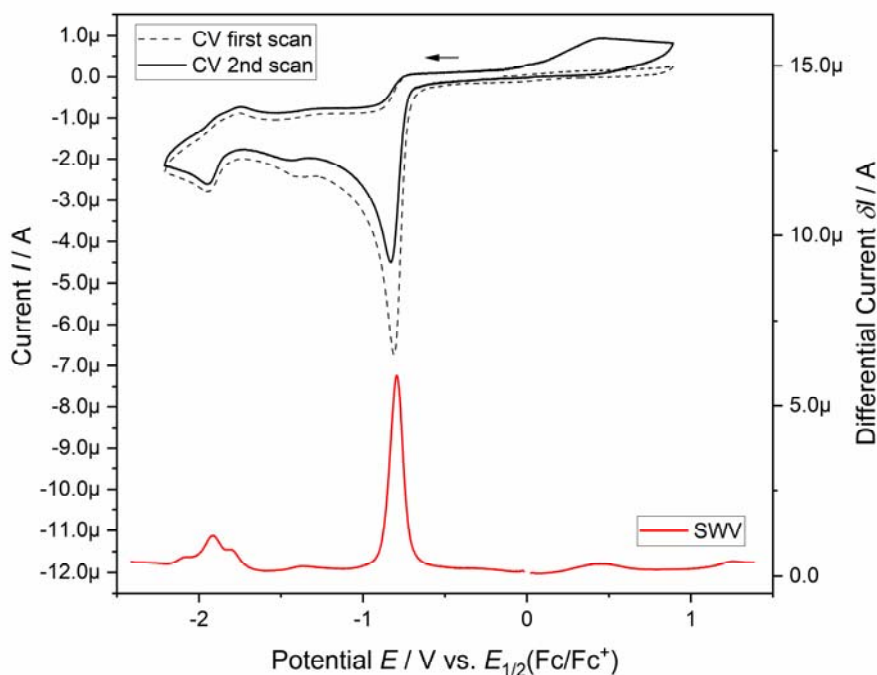

**Figure S 110:** CV first (dashed black) and second scan (black), SWV measurement (red) of **9a**[OTf]<sub>2</sub> (2.0 mM) in CH<sub>2</sub>Cl<sub>2</sub> with 0.1 M [Bu<sub>4</sub>N][OTf] supporting electrolyte with a 1.6 mm Pt disk electrode at a scan rate of  $\nu = 0.1$  V/s. The arrow indicates the scan direction for CV experiments.

#### 2.8.4. Side-Reaction in the synthesis of **18b**[OTf]<sub>2</sub>

Using acetone in a reaction with **11**[OTf], the oxazaphosphole **18b**[OTf]<sub>2</sub> was obtained, after several recrystallizations, in 25 % yield. An extended work-up procedure was necessary to isolate a pure sample of **18b**[OTf]<sub>2</sub>. Reason for this is the slow formation of **32**[OTf]<sub>2</sub> as side product (see **Figure S 111**). A proposed mechanism for the formation of **32**<sup>2+</sup> is depicted in **Figure S 1112**. Intermediary formed LEWIS-acid-base adduct **33**<sup>2+</sup>, which undergoes nucleophilic attack of prop-1-en-2-ol, the enol-tautomer of acetone. Hence, this reaction can be classified as LEWIS-induced aldol-addition. Despite all efforts, **32**[OTf]<sub>2</sub> could not be isolated. However, from a reaction solution, colorless crystals of **32**[OTf]<sub>2</sub> were obtained, which were subsequently analyzed by sc-XRD.

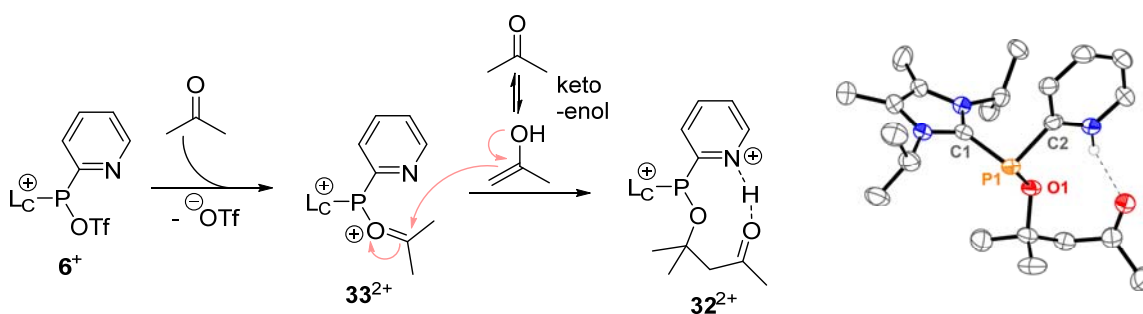

**Figure S 111:** Proposed mechanism for the formation of **32**<sup>2+</sup> via an aldol-type addition of acetone and molecular structure of **32**<sup>2+</sup> in **32**[OTf]<sub>2</sub> (right). Hydrogen atoms and counterions are omitted for clarity, thermal ellipsoids are displayed at 50 % probability, selected bond lengths in Å and angles in (°): P1-C1 1.844(5), P1-O1 1.622(4), P1-C2 1.836(5), C1-P1-O1 77.9(2), C1-P1-C2 82.0(2), C2-P1-O1 85.0(2).

The molecular structure of **32**<sup>2+</sup> is depicted in **Figure S 1112** and proves the structural connectivity of **32**<sup>2+</sup>. Additionally, it reveals the anticipated pyramidal bonding environment on the phosphorus atom. The P1–C1 bond length (1.844(5) Å) is in range of known imidazoliumyl-substituted phosphanes. Notably, the pyridyl-substituent accepts the free proton which is formed in the addition reaction and the so formed pyridinium-salt forms a hydrogen bond to the carbonyl-oxygen atom.

### 2.8.5. Slow Formation of **9a**[OTf]<sub>2</sub> from **20**[OTf]<sub>2</sub> in MeCN Solution

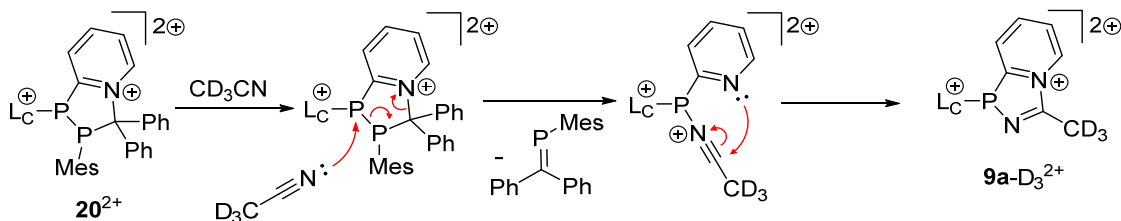

**Scheme S 4:** Proposed mechanism for the formation of **9a-D<sub>3</sub>**<sup>2+</sup> from **20**<sup>2+</sup>.

**20**[OTf]<sub>2</sub> undergoes slow conversion to **9a-D<sub>3</sub>**[OTf]<sub>2</sub> when dissolved in CD<sub>3</sub>CN (see **Scheme S 4**). To gain a deeper understanding of this conversion, a solution of **20**[OTf]<sub>2</sub> in CD<sub>3</sub>CN was prepared and observed by <sup>31</sup>P NMR over two weeks.

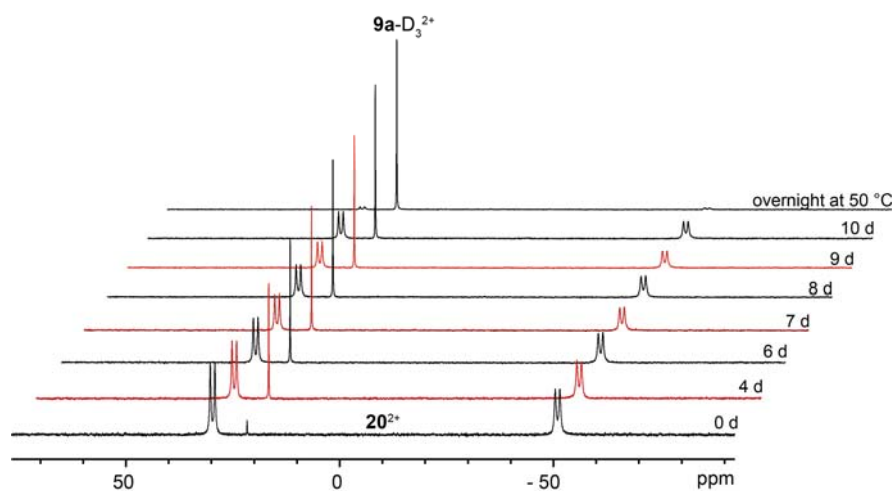

**Figure S 112:** <sup>31</sup>P NMR spectra stack of the reaction of **20**[OTf]<sub>2</sub> with CD<sub>3</sub>CN over two weeks at room temperature (CD<sub>3</sub>CN, 300 K).

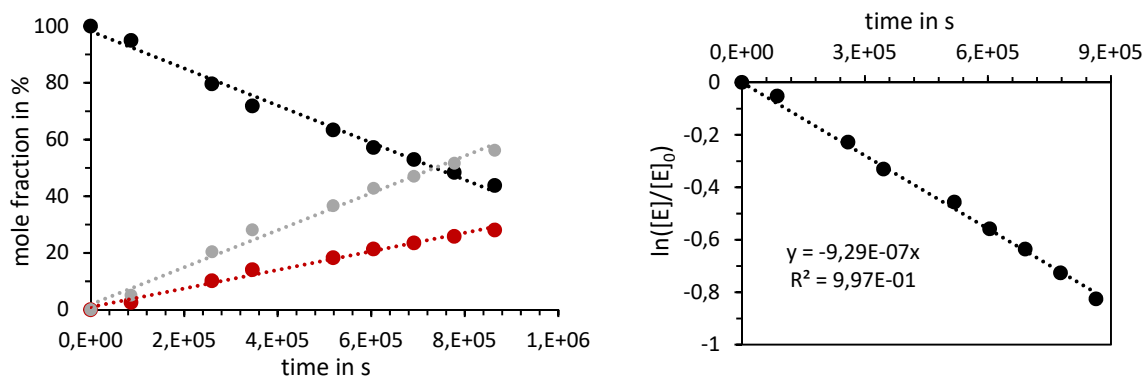

**Figure S 113:** Kinetic analysis of the reaction of **18**[OTf]<sub>2</sub> with CD<sub>3</sub>CN: *Right:* Plot of molar fractions (from <sup>31</sup>P NMR) vs. time **20**<sup>2+</sup>, **9a**<sup>2+</sup>, **9a**<sup>2+</sup> + MesP=CPh<sub>2</sub>; *Left:* Plot of ln([E]/[E]<sub>0</sub>) vs. time.

As depicted in **Figure S 112**, **20**[OTf]<sub>2</sub> reacts with CD<sub>3</sub>CN over a time span of approximately ten days to reach a conversion of 56 %. In **Figure S 1134** a rough kinetic analysis of the reaction is depicted. As two reactants are participating, one would expect the reaction to proceed as a reaction of second order. However, due to the large excess of CD<sub>3</sub>CN that is present, the reaction should rather be described as pseudo-first order. The appropriate rate law is therefore:

$$[E] = [E]_0 e^{-[C]_0 k t} \quad (1)$$

Where:

[E] is the concentration of **20**[OTf]<sub>2</sub>, [E]<sub>0</sub> at the beginning of the reaction

[C] the concentration of CD<sub>3</sub>CN, [C]<sub>0</sub> at the beginning of the reaction

*k* is the second order reaction rate constant

*t* is the time in days

Assuming the concentration of CD<sub>3</sub>CN to be constant, one can simplify the rate law as:

$$[E] = [E]_0 e^{-k' t} \quad (2)$$

With *k'* being the pseudo-first order rate constant. Resolving the formula, by employing the natural logarithm gives:

$$\ln\left(\frac{[E]}{[E]_0}\right) = -k' t \quad (3)$$

Plotting the natural logarithm of [E]/[E]<sub>0</sub> vs. the reaction time gives an approximation for the reaction rate constant *k'*, as can be seen in **Figure S 113**. As the reaction reached 56 % conversion in roughly 10 days, *k'* is expectedly low with 9.29x10<sup>-7</sup> s<sup>-1</sup>. By heating the reaction mixture to 50 °C, full conversion is reached overnight.

### 2.8.6. Attempted Cycloaddition of **24**[OTf] with Phenylacetylene

**22**[OTf] (60 mg, 0.139 mmol, 1.0 equiv.), **23**[OTf] (76.6 mg, 0.139 mmol, 1.0 equiv.) and silver triflate (78.6 mg, 0.306 mmol, 2.2 equiv.) are suspended in 3 mL of CH<sub>2</sub>Cl<sub>2</sub> and stirred for 2 h under exclusion of light. The resulting solid is filtered off and the solvent removed *in vacuo*. After the addition of phenylacetylene (42.6 mg, 0.417 mmol, 1.5 equiv.) the reaction mixture is stirred overnight.

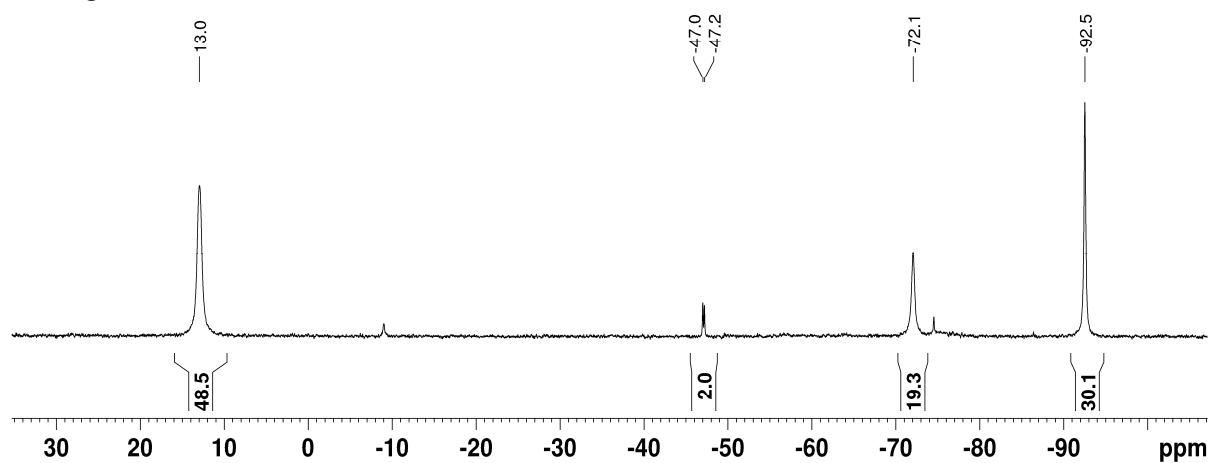

**Figure S 1145:** <sup>31</sup>P NMR spectra stack of the reaction of **24**[OTf]<sub>2</sub> with 1.5 equiv. of phenylacetylene. (CH<sub>2</sub>Cl<sub>2</sub>, C<sub>6</sub>D<sub>6</sub>-ref., 300 K)

## 3. Computational Investigations

### 3.1. Theoretical Methods used for Mechanistic Studies

The geometries and energies of all systems included in this study were fully optimized at the RI-PBE0-D3/def2-TZVP level of theory without symmetry constrains. The calculations have been performed by using the program TURBOMOLE version 7.7.<sup>6</sup> For the calculations we have used the PBE0<sup>7</sup> functional, def2-TZVP<sup>8</sup> basis set and the D3 correction for dispersion.<sup>9</sup> In order to reproduce solvent effects, we have used the conductor-like screening model COSMO,<sup>10</sup> which is a variant of the dielectric continuum solvation models. The minimum nature of the complexes and compounds have been confirmed by doing frequency calculations. The transition states only present one negative frequency that corresponds to the movement of atoms connecting the starting with the final product.

#### 3.1.1. Cartesian Coordinates

##### Starting point

|   |            |            |            |
|---|------------|------------|------------|
| P | 1.1181520  | -1.0102171 | 0.5176404  |
| N | -0.0692107 | 1.4407200  | -0.5410264 |
| N | 0.6040635  | -0.0238219 | -1.9985174 |
| N | -0.3249207 | -1.6162047 | 1.1429072  |
| N | -1.4663385 | -0.8675834 | 1.2699001  |
| C | 0.4588702  | 0.2132383  | -0.6805070 |
| C | -0.2445847 | 1.9952202  | -1.7865976 |
| C | 0.1743685  | 1.0699980  | -2.7071713 |
| C | -0.4332326 | 2.0667798  | 0.7566453  |
| H | -0.3679844 | 1.2521228  | 1.4678180  |
| C | 0.5615685  | 3.1465142  | 1.1404586  |
| H | 1.5816047  | 2.7623884  | 1.1465324  |
| H | 0.3280938  | 3.4932551  | 2.1482382  |
| H | 0.5183138  | 4.0124080  | 0.4788011  |
| C | -1.8819135 | 2.5195536  | 0.7757085  |
| H | -2.0544820 | 3.4422114  | 0.2248758  |
| H | -2.1588690 | 2.7049155  | 1.8147218  |
| H | -2.5354972 | 1.7351988  | 0.3921414  |
| C | 1.1548376  | -1.2841679 | -2.5482570 |
| H | 1.2267059  | -1.9456688 | -1.6813697 |
| C | 2.5608056  | -1.0786621 | -3.0804507 |
| H | 2.5837304  | -0.4216947 | -3.9501702 |
| H | 2.9712297  | -2.0426419 | -3.3841229 |
| H | 3.2133109  | -0.6583288 | -2.3130130 |
| C | 0.2025504  | -1.9424940 | -3.5303029 |
| H | -0.8106135 | -1.9923576 | -3.1276703 |
| H | 0.5442591  | -2.9627460 | -3.7103147 |
| H | 0.1766214  | -1.4345391 | -4.4928506 |



|   |            |            |            |
|---|------------|------------|------------|
| C | -0.8080080 | 3.3390973  | -2.0610793 |
| H | -1.8999024 | 3.3267973  | -2.0466097 |
| H | -0.4954648 | 3.6698447  | -3.0502551 |
| H | -0.4674627 | 4.0820657  | -1.3433108 |
| C | 0.1450054  | 1.1848137  | -4.1853192 |
| H | 1.0365435  | 0.7703850  | -4.6519795 |
| H | 0.0852353  | 2.2345678  | -4.4678561 |
| H | -0.7270594 | 0.6821240  | -4.6094606 |
| C | -0.4745673 | -2.8731150 | 1.7095206  |
| C | -1.7453978 | -2.9088761 | 2.1913891  |
| H | -2.2165994 | -3.7388175 | 2.6937796  |
| C | -2.3207769 | -1.6413021 | 1.8960338  |
| C | 0.6044896  | -3.8903545 | 1.7349310  |
| H | 0.9274454  | -4.1625444 | 0.7269447  |
| H | 0.2382451  | -4.7907715 | 2.2255742  |
| H | 1.4814801  | -3.5354393 | 2.2816791  |
| C | -3.6932455 | -1.1762909 | 2.2135718  |
| H | -3.8693434 | -1.2089340 | 3.2911244  |
| H | -4.4383706 | -1.8221149 | 1.7435274  |
| H | -3.8434754 | -0.1553082 | 1.8651105  |
| O | 1.5874977  | 0.1698003  | 1.6379916  |
| S | 2.5519101  | -0.1248316 | 2.8671656  |
| C | 1.2967314  | 0.0984790  | 4.2138556  |
| O | 2.9329730  | -1.4940883 | 2.8495509  |
| O | 3.4726152  | 0.9442032  | 2.9522151  |
| F | 0.3501760  | -0.8160516 | 4.0841466  |
| F | 1.8998392  | -0.0392539 | 5.3722986  |
| F | 0.7580475  | 1.3025200  | 4.1214132  |

### **TS1 (stepwise)**

|   |            |            |            |
|---|------------|------------|------------|
| P | 1.2396094  | -0.6039289 | 0.5994755  |
| N | -0.1566590 | 1.7622227  | -0.3797505 |
| N | 0.9123779  | 0.5823152  | -1.8612078 |
| N | -0.1350085 | -1.3220582 | 1.2699203  |
| N | -1.3563554 | -0.7232804 | 1.3917649  |
| C | 0.5498842  | 0.6323906  | -0.5643202 |
| C | -0.2489512 | 2.4310316  | -1.5757711 |
| C | 0.4303615  | 1.6899392  | -2.5086683 |
| C | -0.6861101 | 2.2308732  | 0.9254076  |
| H | -0.5492861 | 1.3835959  | 1.5867700  |
| C | 0.1239619  | 3.4023374  | 1.4521418  |
| H | 1.1875591  | 3.1656098  | 1.4840065  |
| H | -0.2018614 | 3.6170543  | 2.4711756  |
| H | -0.0140141 | 4.3116729  | 0.8670054  |
| C | -2.1815831 | 2.4809228  | 0.8708037  |
| H | -2.4474127 | 3.3979994  | 0.3476624  |
| H | -2.5441382 | 2.5743423  | 1.8959056  |
| H | -2.6937021 | 1.6352411  | 0.4111887  |
| C | 1.7964267  | -0.4666612 | -2.4288937 |
| H | 1.7310693  | -1.2852113 | -1.7133583 |
| C | 3.2273819  | 0.0372628  | -2.4759934 |
| H | 3.3381790  | 0.8888724  | -3.1493927 |

|   |            |            |            |
|---|------------|------------|------------|
| H | 3.8772670  | -0.7610517 | -2.8373999 |
| H | 3.5766105  | 0.3355020  | -1.4851953 |
| C | 1.2978905  | -1.0156420 | -3.7528622 |
| H | 0.2255573  | -1.2042581 | -3.7229003 |
| H | 1.7935613  | -1.9722974 | -3.9233815 |
| H | 1.5372469  | -0.3706818 | -4.5963884 |
| C | -0.9841988 | 3.6995817  | -1.7984802 |
| H | -2.0574760 | 3.5247758  | -1.8997943 |
| H | -0.6386473 | 4.1666178  | -2.7192146 |
| H | -0.8325715 | 4.4132324  | -0.9919662 |
| C | 0.6242871  | 1.9972029  | -3.9461456 |
| H | 1.6624366  | 1.8737201  | -4.2527897 |
| H | 0.3462796  | 3.0317417  | -4.1378960 |
| H | 0.0042635  | 1.3642146  | -4.5830273 |
| C | -0.1478414 | -2.6114218 | 1.7661880  |
| C | -1.4163194 | -2.8202425 | 2.2172188  |
| H | -1.7882056 | -3.7164857 | 2.6886536  |
| C | -2.1296531 | -1.6178253 | 1.9613990  |
| C | 1.0362181  | -3.5037622 | 1.7558740  |
| H | 1.3659391  | -3.7083126 | 0.7341146  |
| H | 0.7784821  | -4.4506283 | 2.2286205  |
| H | 1.8788823  | -3.0695143 | 2.2988639  |
| C | -3.5526086 | -1.3229382 | 2.2644230  |
| H | -3.7410363 | -1.3952733 | 3.3380313  |
| H | -4.2141151 | -2.0394469 | 1.7716471  |
| H | -3.8145601 | -0.3195263 | 1.9315828  |
| O | 1.6234324  | 0.5834665  | 1.7585181  |
| S | 2.7233267  | 0.3756055  | 2.8798770  |
| C | 1.5867173  | 0.3721842  | 4.3448008  |
| O | 3.2845776  | -0.9256006 | 2.7636040  |
| O | 3.5001958  | 1.5559766  | 2.9405659  |
| F | 0.7861987  | -0.6793959 | 4.2766546  |
| F | 2.3172395  | 0.3108461  | 5.4356968  |
| F | 0.8590870  | 1.4756224  | 4.3487721  |
| N | -0.5036285 | -2.5553805 | -1.5222278 |
| C | -1.3832380 | -3.2871794 | -1.4207448 |
| C | -2.4884902 | -4.2113815 | -1.2849092 |
| H | -2.6753839 | -4.4034717 | -0.2273166 |
| H | -3.3873882 | -3.7882717 | -1.7354511 |
| H | -2.2520639 | -5.1528446 | -1.7828870 |

### **Final Product**

|   |            |            |            |
|---|------------|------------|------------|
| P | 0.9026903  | 0.0913033  | 0.6644699  |
| N | -0.5991170 | 1.6798629  | -1.3129798 |
| N | 0.9786379  | 0.3836903  | -2.0547504 |
| N | -0.5925323 | -0.7289056 | 1.2321381  |
| N | -0.8440377 | -0.2488628 | 2.4827455  |
| N | 0.6174457  | 1.3308977  | 1.7728368  |
| C | 0.3022165  | 0.7511818  | -0.9473885 |
| C | -0.4777257 | 1.9263090  | -2.6573297 |
| C | 0.5187763  | 1.1019717  | -3.1255736 |
| C | -1.5419984 | 2.3010103  | -0.3597860 |

|   |            |            |            |
|---|------------|------------|------------|
| H | -1.4484570 | 1.6832825  | 0.5302100  |
| C | -1.1060121 | 3.7106595  | -0.0040163 |
| H | -0.0886321 | 3.7133411  | 0.3881769  |
| H | -1.7702642 | 4.1068162  | 0.7659403  |
| H | -1.1570018 | 4.3847399  | -0.8597292 |
| C | -2.9824193 | 2.1981618  | -0.8298200 |
| H | -3.2151159 | 2.8938921  | -1.6341421 |
| H | -3.6359954 | 2.4445419  | 0.0083239  |
| H | -3.2238963 | 1.1852675  | -1.1576575 |
| C | 2.0491835  | -0.6548855 | -2.0534960 |
| H | 1.9694808  | -1.1427108 | -1.0790404 |
| C | 3.4204740  | -0.0147182 | -2.1368427 |
| H | 3.5940836  | 0.4871217  | -3.0901274 |
| H | 4.1747095  | -0.7946442 | -2.0238716 |
| H | 3.5666801  | 0.7062044  | -1.3303078 |
| C | 1.8000195  | -1.7351396 | -3.0900031 |
| H | 0.7618087  | -2.0724499 | -3.0753591 |
| H | 2.4257476  | -2.5900666 | -2.8309137 |
| H | 2.0600878  | -1.4281688 | -4.1021000 |
| C | -1.2926111 | 2.8919867  | -3.4336100 |
| H | -2.2677517 | 2.4766305  | -3.6974302 |
| H | -0.7801746 | 3.1391848  | -4.3620733 |
| H | -1.4548595 | 3.8218541  | -2.8910823 |
| C | 1.0118327  | 0.9764369  | -4.5179769 |
| H | 2.0958510  | 0.8858968  | -4.5586550 |
| H | 0.7317467  | 1.8602966  | -5.0889437 |
| H | 0.5797370  | 0.1082992  | -5.0198789 |
| C | -1.2132999 | -1.9066388 | 1.0924107  |
| C | -1.8954073 | -2.1584271 | 2.2813079  |
| H | -2.5035998 | -3.0229512 | 2.4920080  |
| C | -1.6279997 | -1.1233632 | 3.1561341  |
| C | -1.1300737 | -2.7164767 | -0.1373269 |
| H | -1.1912522 | -2.0878627 | -1.0283935 |
| H | -1.9371815 | -3.4463948 | -0.1626712 |
| H | -0.1668864 | -3.2351875 | -0.1482827 |
| C | -2.0546205 | -0.9653556 | 4.5635278  |
| H | -1.1897890 | -0.9617109 | 5.2302222  |
| H | -2.6874705 | -1.8072882 | 4.8370840  |
| H | -2.6203594 | -0.0466170 | 4.7251476  |
| C | -0.1310325 | 0.9451131  | 2.7293913  |
| C | -0.3051857 | 1.6564135  | 4.0131585  |
| H | -1.3568383 | 1.8505255  | 4.2304647  |
| H | 0.2414998  | 2.5944665  | 3.9627959  |
| H | 0.1080792  | 1.0544753  | 4.8264597  |
| S | 2.3547629  | -2.4823052 | 1.9276276  |
| C | 1.8602698  | -4.0607416 | 2.7458610  |
| O | 1.8204864  | -2.6423663 | 0.5742836  |
| O | 3.7776926  | -2.4190404 | 2.0315326  |
| O | 1.6115462  | -1.4776330 | 2.6926609  |
| F | 0.5286589  | -4.2232976 | 2.6572306  |
| F | 2.1861377  | -4.0522928 | 4.0295857  |
| F | 2.4392556  | -5.0953325 | 2.1578235  |

**TS(concerted)**

|   |            |            |            |
|---|------------|------------|------------|
| P | -0.5180023 | -0.7610942 | 1.0505516  |
| N | 0.9039269  | 1.3933275  | -0.3423259 |
| N | 2.1463662  | -0.1762529 | 0.4965201  |
| N | -1.8958634 | -0.4230437 | -0.0081012 |
| N | -3.0286143 | -0.0772338 | 0.6449402  |
| N | -1.1082015 | 0.8317136  | 2.0617070  |
| C | 0.8749474  | 0.2191231  | 0.3172543  |
| C | 2.2150112  | 1.7286158  | -0.6077553 |
| C | 2.9962403  | 0.7408388  | -0.0769644 |
| C | -0.2774315 | 2.2412536  | -0.6205733 |
| H | -1.1225658 | 1.6190432  | -0.3485294 |
| C | -0.2919804 | 3.4645015  | 0.2827639  |
| H | -0.1710573 | 3.1814533  | 1.3282146  |
| H | -1.2540017 | 3.9685490  | 0.1729511  |
| H | 0.4823934  | 4.1852554  | 0.0227746  |
| C | -0.4183174 | 2.5835948  | -2.0940741 |
| H | 0.2810554  | 3.3536651  | -2.4153818 |
| H | -1.4254726 | 2.9683756  | -2.2614328 |
| H | -0.2887009 | 1.7046913  | -2.7257031 |
| C | 2.5391416  | -1.3882012 | 1.2587641  |
| H | 1.6004129  | -1.7922587 | 1.6360806  |
| C | 3.3821115  | -1.0276162 | 2.4682362  |
| H | 4.3898596  | -0.7127596 | 2.1993796  |
| H | 3.4724871  | -1.9156394 | 3.0953376  |
| H | 2.9112462  | -0.2423324 | 3.0625166  |
| C | 3.1620161  | -2.4447268 | 0.3667650  |
| H | 2.5698697  | -2.5954439 | -0.5346957 |
| H | 3.1755992  | -3.3873673 | 0.9137394  |
| H | 4.1876573  | -2.2065157 | 0.0858015  |
| C | 2.6659730  | 2.9250176  | -1.3610393 |
| H | 2.4940119  | 2.8133088  | -2.4338302 |
| H | 3.7341251  | 3.0674981  | -1.2086230 |
| H | 2.1703517  | 3.8367445  | -1.0329817 |
| C | 4.4781068  | 0.6616262  | -0.0806825 |
| H | 4.8342447  | -0.3542731 | -0.2310874 |
| H | 4.9019736  | 1.0356018  | 0.8538796  |
| H | 4.8755300  | 1.2683717  | -0.8925996 |
| C | -2.1625410 | -0.6574404 | -1.3276810 |
| C | -3.5115906 | -0.4509111 | -1.4940287 |
| H | -4.0572316 | -0.5253832 | -2.4215286 |
| C | -4.0177404 | -0.0932621 | -0.2347648 |
| C | -1.1655327 | -1.0058434 | -2.3688631 |
| H | -0.1668745 | -0.6439244 | -2.1305035 |
| H | -1.4837803 | -0.5716227 | -3.3172519 |
| H | -1.0956026 | -2.0844992 | -2.5001784 |
| C | -5.4170488 | 0.2368917  | 0.1325885  |
| H | -6.0805630 | -0.5831356 | -0.1487204 |
| H | -5.7599958 | 1.1288083  | -0.3969733 |
| H | -5.5220549 | 0.4005898  | 1.2034593  |
| C | -2.2639132 | 0.9840805  | 2.2289424  |
| C | -3.4349667 | 1.4771317  | 2.9278903  |

|   |            |            |            |
|---|------------|------------|------------|
| H | -4.0401849 | 2.0966236  | 2.2661843  |
| H | -3.1036195 | 2.0643935  | 3.7863405  |
| H | -4.0341065 | 0.6325972  | 3.2724198  |
| S | -0.4240652 | -3.5714203 | 0.4866884  |
| O | -0.0449330 | -2.2007864 | -0.1132487 |
| O | -1.8113660 | -3.6101634 | 0.8146806  |
| O | 0.5572551  | -4.0019187 | 1.4286009  |
| C | -0.1915811 | -4.6321673 | -1.0149779 |
| F | -1.1124097 | -4.3509788 | -1.9278622 |
| F | -0.3092587 | -5.8918393 | -0.6506826 |
| F | 1.0092562  | -4.4332315 | -1.5423265 |

### **TS2 (stepwise)**

|   |            |            |            |
|---|------------|------------|------------|
| P | -0.8547507 | -1.3519923 | 1.4824979  |
| N | 0.4514280  | 1.0096414  | 0.4150815  |
| N | 1.7405568  | -0.6949628 | 0.8625706  |
| N | -2.1873962 | -1.0563219 | 0.4197641  |
| N | -3.3015277 | -0.3919013 | 0.8167335  |
| N | -1.5845603 | -0.3519143 | 2.8053260  |
| C | 0.4608089  | -0.2468372 | 0.9144849  |
| C | 1.7168534  | 1.3565005  | 0.0480260  |
| C | 2.5350664  | 0.2760774  | 0.3357261  |
| C | -0.7618734 | 1.8624052  | 0.3468730  |
| H | -1.5730483 | 1.1958857  | 0.6260816  |
| C | -0.7001845 | 2.9759657  | 1.3793687  |
| H | -0.4998445 | 2.5831417  | 2.3780023  |
| H | -1.6629974 | 3.4894277  | 1.3965573  |
| H | 0.0568472  | 3.7246752  | 1.1505247  |
| C | -1.0449656 | 2.3340279  | -1.0680764 |
| H | -0.3470337 | 3.0962277  | -1.4094823 |
| H | -2.0420582 | 2.7761276  | -1.0889975 |
| H | -1.0340199 | 1.5020699  | -1.7745233 |
| C | 2.1822307  | -2.0287529 | 1.3633173  |
| H | 1.2494660  | -2.5573888 | 1.5695138  |
| C | 2.9284876  | -1.8880447 | 2.6781882  |
| H | 3.8877221  | -1.3839763 | 2.5640951  |
| H | 3.1283557  | -2.8848594 | 3.0737424  |
| H | 2.3375007  | -1.3433154 | 3.4167345  |
| C | 2.9218213  | -2.8199011 | 0.3002346  |
| H | 2.3828470  | -2.8221057 | -0.6491026 |
| H | 3.0018759  | -3.8532169 | 0.6406636  |
| H | 3.9342323  | -2.4586438 | 0.1304248  |
| C | 2.1224939  | 2.6366761  | -0.5774169 |
| H | 1.9729874  | 2.6064557  | -1.6599418 |
| H | 3.1817645  | 2.8149407  | -0.3995804 |
| H | 1.5742048  | 3.4882292  | -0.1833591 |
| C | 3.9930343  | 0.1738008  | 0.0922104  |
| H | 4.5104847  | -0.3586134 | 0.8864873  |
| H | 4.4261614  | 1.1704567  | 0.0266591  |
| H | 4.1996515  | -0.3365338 | -0.8517472 |
| C | -2.3697095 | -1.6122296 | -0.8207919 |
| C | -3.6346922 | -1.2641231 | -1.2142666 |

|   |            |            |            |
|---|------------|------------|------------|
| H | -4.1140394 | -1.5300596 | -2.1434432 |
| C | -4.1906445 | -0.5122585 | -0.1564375 |
| C | -1.3146773 | -2.4069004 | -1.4934144 |
| H | -0.4528368 | -1.7885339 | -1.7616741 |
| H | -1.7071401 | -2.8431298 | -2.4105863 |
| H | -0.9660109 | -3.2295553 | -0.8603522 |
| C | -5.5486553 | 0.0742298  | -0.0627464 |
| H | -6.3036728 | -0.7150217 | -0.0779114 |
| H | -5.7441653 | 0.7241253  | -0.9178442 |
| H | -5.6730899 | 0.6552902  | 0.8498460  |
| C | -2.6922606 | 0.0333554  | 2.9135536  |
| C | -3.8522982 | 0.5982760  | 3.5429053  |
| H | -4.1614546 | 1.5006851  | 3.0128218  |
| H | -3.5940330 | 0.8343811  | 4.5804402  |
| H | -4.6655223 | -0.1315456 | 3.5237430  |
| C | 1.3032955  | -0.4666326 | -4.7012204 |
| F | 0.9960236  | 0.7666520  | -5.0973600 |
| F | 2.3225483  | -0.9040304 | -5.4249836 |
| F | 0.2493575  | -1.2519901 | -4.9325673 |
| S | 1.7147230  | -0.4794570 | -2.9049470 |
| O | 0.4850670  | 0.0092106  | -2.2864368 |
| O | 1.9858701  | -1.8678990 | -2.6055967 |
| O | 2.8326873  | 0.4261907  | -2.7752290 |

### 3.2. Theoretical Methods used for Electronic Structure Analysis

**Material simulations** were performed at the density functional theory (DFT) and time-dependent DFT (TD-DFT) level of theory using the Gaussian16.<sup>1,11</sup> The long-range corrected hybrid functional CAM-B3LYP<sup>12</sup> was used in combination with the 6-311G\*\* basis set,<sup>13</sup> which has shown especially qualitative agreement with experiments for organic molecules including azaphopholes.<sup>1,14</sup> Simulated absorption spectra were constructed by using Gaussian functions with a broadening of 15 meV and a systematic empirical energy shift of -400 meV resembling the broadening and absorption energies of the experimental absorption features in PMMA films (cf. **Figure 4b**). To evaluate the aromaticity of the molecules, NICS(1)<sub>zz</sub> values<sup>15</sup> and plots of the anisotropy of the current induced density (ACID)<sup>16</sup> are calculated and depicted in **Figure S 1156**.

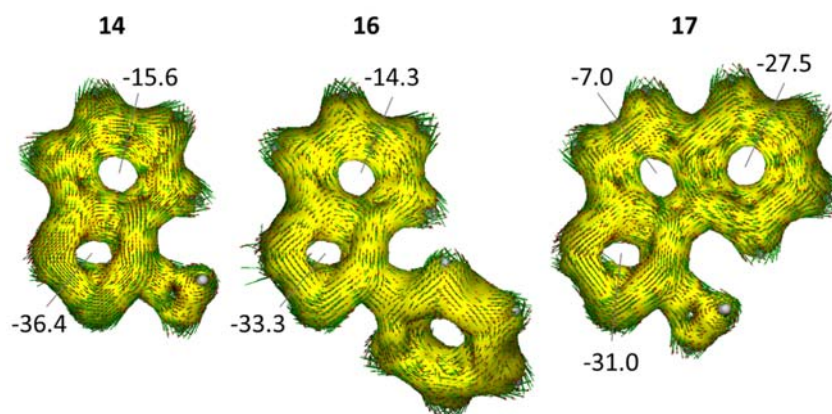

**Figure S 1156:** Anisotropy of the induced current plots (ACID) with NICS(1)<sub>zz</sub> values of the diazaphosphole rings.

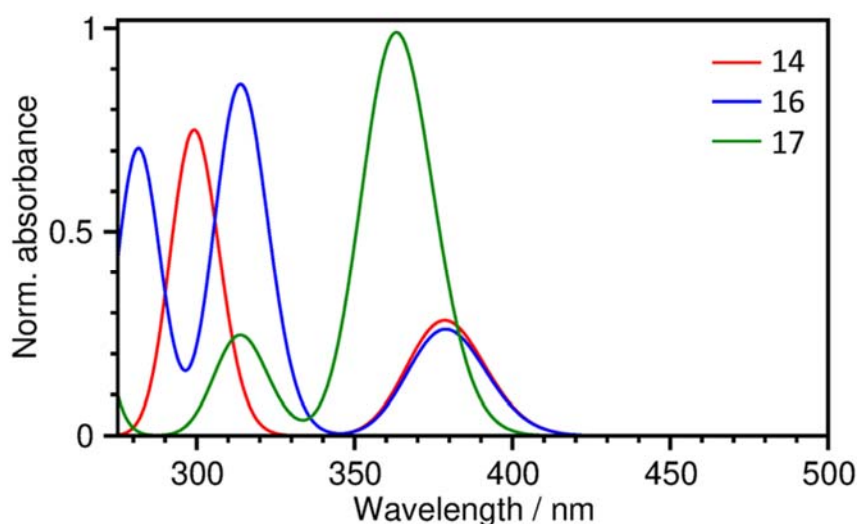

**Figure S 1167:** Simulated absorption spectra of the compounds diluted in PMMA (vacuum spectra empirically shifted in energy by -400 meV to match the experimental spectra depicted in **Figure 4b** in the main manuscript).

## 4. Photophysical Characterization

Aside from the absorption and emission spectra in PMMA shown in **Figure 4** in the main manuscript, spectroscopic analysis was also performed for **14**, **16**, and **17** in solution in chloroform ( $10^{-4}$  mol/L) as presented in **Figure S 1178**. Their photophysical characteristics are also summarized in **Table S 1**.

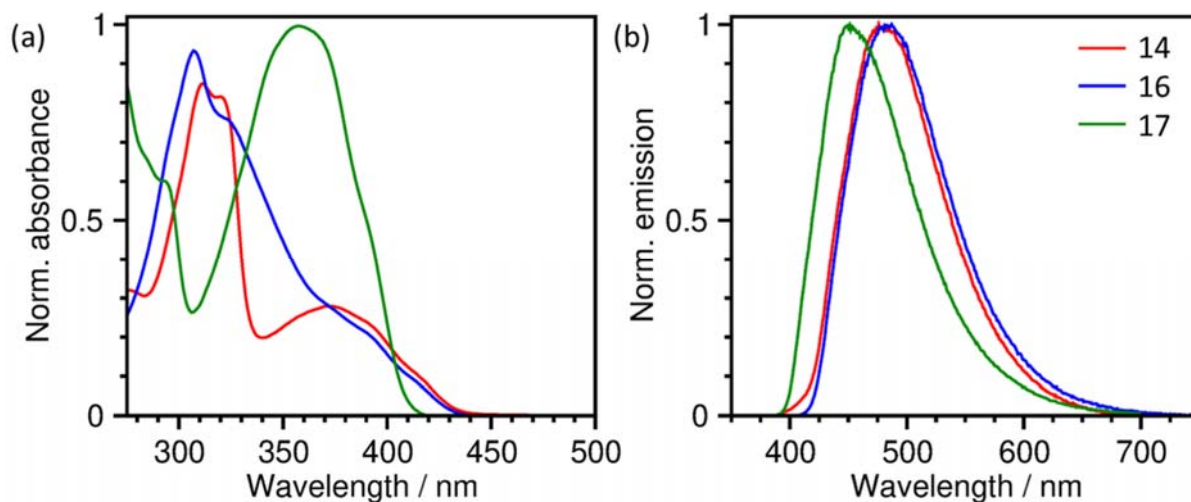

**Figure S 1178:** a) Normalized absorption spectra (relative to the absorption maximum of **17**) and b) normalized emission spectra of the newly synthesized diazaphospholes in chloroform solutions ( $\lambda_{exc} = 340$  nm).

**Table S 1:** Photophysical characteristics of **14**, **16**, and **17** in diluted chloroform and PMMA films ( $\lambda_{exc} = 340$  nm). The fluorescence quantum yield  $\Phi_{FL}^{film}$  was measured in nitrogen atmosphere.

| Compound  | $\lambda_{abs}^{sol}$ in nm | $\lambda_{em}^{sol}$ in nm | $\Phi_{FL}^{sol}$ in % | $\lambda_{abs}^{film}$ in nm | $\lambda_{em}^{film}$ in nm | $\Phi_{FL}^{film}$ in % |
|-----------|-----------------------------|----------------------------|------------------------|------------------------------|-----------------------------|-------------------------|
| <b>14</b> | 310, 372                    | 476                        | 33.1                   | 310, 360                     | 470                         | 37.0                    |
| <b>16</b> | 307                         | 480                        | 6.5                    | 304                          | 470                         | 9.2                     |
| <b>17</b> | 272, 358                    | 451                        | 25.2                   | 270, 358                     | 457                         | 14.9                    |



## 5. X-ray Diffraction Refinements

### 5.1. General remarks

Suitable single crystals were coated with Paratone-N oil or Fomblin Y25 PFPE oil, mounted using a glass fiber and frozen in the cold nitrogen stream. X-ray diffraction data were collected at 100 K on a Rigaku Oxford Diffraction SuperNova diffractometer using either Cu K $\alpha$  radiation ( $\lambda = 1.54184 \text{ \AA}$ ) generated by micro-focus sources. The data reduction and absorption correction was performed using CrysAlisPro<sup>17</sup>, respectively. Using Olex2<sup>18</sup>, the structures were solved with SHELXT<sup>19</sup> by direct methods and refined with SHELXL<sup>20</sup> by least-square minimization against  $F^2$  using first isotropic and later anisotropic thermal parameters for all non-hydrogen atoms. Hydrogen atoms were added to the structure models on calculated positions using the riding model. Images of the structures were produced with the Olex2 software.

## 5.2. Crystallographic data

| Compound                                         | 9a[OTf] <sub>2</sub>                                                                         | 9b[OTf] <sub>2</sub>                                                                         | 9d[OTf] <sub>2</sub>                                                                         | 9e[OTf] <sub>2</sub> ·0.25 MeCN                                                                                 | 9f[OTf] <sub>4</sub> ·2 MeCN                                                                                  |
|--------------------------------------------------|----------------------------------------------------------------------------------------------|----------------------------------------------------------------------------------------------|----------------------------------------------------------------------------------------------|-----------------------------------------------------------------------------------------------------------------|---------------------------------------------------------------------------------------------------------------|
| <b>Empirical formula</b>                         | C <sub>20</sub> H <sub>27</sub> F <sub>6</sub> N <sub>4</sub> O <sub>6</sub> PS <sub>2</sub> | C <sub>21</sub> H <sub>29</sub> F <sub>6</sub> N <sub>4</sub> O <sub>6</sub> PS <sub>2</sub> | C <sub>26</sub> H <sub>30</sub> F <sub>6</sub> N <sub>5</sub> O <sub>8</sub> PS <sub>2</sub> | C <sub>110</sub> H <sub>139</sub> F <sub>24</sub> N <sub>21</sub> O <sub>24</sub> P <sub>4</sub> S <sub>8</sub> | C <sub>50</sub> H <sub>62</sub> F <sub>12</sub> N <sub>10</sub> O <sub>12</sub> P <sub>2</sub> S <sub>4</sub> |
| <b>Formula weight [g/mol]</b>                    | 628.54                                                                                       | 642.57                                                                                       | 749.64                                                                                       | 2975.77                                                                                                         | 1413.27                                                                                                       |
| <b>Temperature [K]</b>                           | 100.01(10)                                                                                   | 100.03(12)                                                                                   | 100.0(2)                                                                                     | 100.01(10)                                                                                                      | 99.9(2)                                                                                                       |
| <b>Crystal system</b>                            | triclinic                                                                                    | triclinic                                                                                    | triclinic                                                                                    | triclinic                                                                                                       | monoclinic                                                                                                    |
| <b>Space group</b>                               | P-1                                                                                          | P-1                                                                                          | P-1                                                                                          | P-1                                                                                                             | P <sub>2</sub> /c                                                                                             |
| <b>a [Å]</b>                                     | 8.0317(2)                                                                                    | 7.8065(4)                                                                                    | 10.0358(2)                                                                                   | 13.6839(5)                                                                                                      | 14.2530(2)                                                                                                    |
| <b>b [Å]</b>                                     | 12.2262(3)                                                                                   | 12.1707(4)                                                                                   | 11.58762(19)                                                                                 | 14.3106(8)                                                                                                      | 13.4174(2)                                                                                                    |
| <b>c [Å]</b>                                     | 13.7991(3)                                                                                   | 14.9023(5)                                                                                   | 15.5946(2)                                                                                   | 18.0682(8)                                                                                                      | 16.3574(2)                                                                                                    |
| <b>α [°]</b>                                     | 81.406(2)                                                                                    | 79.352(3)                                                                                    | 95.6498(12)                                                                                  | 100.014(4)                                                                                                      | 90                                                                                                            |
| <b>β [°]</b>                                     | 89.124(2)                                                                                    | 86.084(4)                                                                                    | 107.2800(15)                                                                                 | 108.083(4)                                                                                                      | 90.1710(10)                                                                                                   |
| <b>γ [°]</b>                                     | 83.879(2)                                                                                    | 79.364(3)                                                                                    | 110.3810(17)                                                                                 | 92.247(4)                                                                                                       | 90                                                                                                            |
| <b>Volume [Å<sup>3</sup>]</b>                    | 1332.18(6)                                                                                   | 1366.73(10)                                                                                  | 1581.42(5)                                                                                   | 3295.8(3)                                                                                                       | 3128.15(7)                                                                                                    |
| <b>Z</b>                                         | 2                                                                                            | 2                                                                                            | 2                                                                                            | 1                                                                                                               | 2                                                                                                             |
| <b>ρ<sub>calc</sub> [g/cm<sup>3</sup>]</b>       | 1.567                                                                                        | 1.561                                                                                        | 1.574                                                                                        | 1.499                                                                                                           | 1.500                                                                                                         |
| <b>μ [mm<sup>-1</sup>]</b>                       | 3.174                                                                                        | 3.107                                                                                        | 2.841                                                                                        | 2.674                                                                                                           | 2.783                                                                                                         |
| <b>F(000)</b>                                    | 648.0                                                                                        | 664.0                                                                                        | 772.0                                                                                        | 1542.0                                                                                                          | 1460.0                                                                                                        |
| <b>Crystal size [mm<sup>3</sup>]</b>             | 0.179 × 0.134 × 0.109                                                                        | 0.297 × 0.121 × 0.118                                                                        | 0.297 × 0.204 × 0.098                                                                        | 0.166 × 0.099 × 0.041                                                                                           | 0.4 × 0.178 × 0.059                                                                                           |
| <b>Radiation (λ in Å)</b>                        | CuKα (λ = 1.54184)                                                                           | CuKα (λ = 1.54184)                                                                           | CuKα (λ = 1.54184)                                                                           | Cu Kα (λ = 1.54184)                                                                                             | CuKα (λ = 1.54184)                                                                                            |
| <b>2θ range for data collection [°]</b>          | 6.478 to 152.982                                                                             | 6.038 to 153.932                                                                             | 6.092 to 153.54                                                                              | 5.246 to 136.498                                                                                                | 6.202 to 153.17                                                                                               |
| <b>Index ranges</b>                              | -10 ≤ h ≤ 9, -15 ≤ k ≤ 12, -16 ≤ l ≤ 17                                                      | -9 ≤ h ≤ 7, -13 ≤ k ≤ 15, -18 ≤ l ≤ 18                                                       | -12 ≤ h ≤ 6, -13 ≤ k ≤ 14, -19 ≤ l ≤ 19                                                      | -16 ≤ h ≤ 16, -17 ≤ k ≤ 17, -21 ≤ l ≤ 16                                                                        | -17 ≤ h ≤ 17, -16 ≤ k ≤ 16, -12 ≤ l ≤ 20                                                                      |
| <b>Reflections collected</b>                     | 12715                                                                                        | 12626                                                                                        | 15338                                                                                        | 38344                                                                                                           | 17844                                                                                                         |
| <b>Independent reflections</b>                   | 5524 [R <sub>int</sub> = 0.0203, R <sub>sigma</sub> = 0.0280]                                | 5671 [R <sub>int</sub> = 0.0360, R <sub>sigma</sub> = 0.0383]                                | 6601 [R <sub>int</sub> = 0.0221, R <sub>sigma</sub> = 0.0268]                                | 12075 [R <sub>int</sub> = 0.0484, R <sub>sigma</sub> = 0.0468]                                                  | 6508 [R <sub>int</sub> = 0.0270, R <sub>sigma</sub> = 0.0309]                                                 |
| <b>Data/restraints/parameters</b>                | 5524/22/432                                                                                  | 5671/144/405                                                                                 | 6601/0/439                                                                                   | 12075/661/1026                                                                                                  | 6508/0/413                                                                                                    |
| <b>Goodness-of-fit on F<sup>2</sup></b>          | 1.045                                                                                        | 1.058                                                                                        | 1.043                                                                                        | 1.092                                                                                                           | 1.030                                                                                                         |
| <b>Final R indexes (I &gt;= 2σ (I))</b>          | R <sub>1</sub> = 0.0294, wR <sub>2</sub> = 0.0745                                            | R <sub>1</sub> = 0.0580, wR <sub>2</sub> = 0.1614                                            | R <sub>1</sub> = 0.0327, wR <sub>2</sub> = 0.0847                                            | R <sub>1</sub> = 0.0711, wR <sub>2</sub> = 0.1721                                                               | R <sub>1</sub> = 0.0377, wR <sub>2</sub> = 0.0997                                                             |
| <b>Final R indexes (all data)</b>                | R <sub>1</sub> = 0.0315, wR <sub>2</sub> = 0.0762                                            | R <sub>1</sub> = 0.0613, wR <sub>2</sub> = 0.1656                                            | R <sub>1</sub> = 0.0337, wR <sub>2</sub> = 0.0857                                            | R <sub>1</sub> = 0.0854, wR <sub>2</sub> = 0.1808                                                               | R <sub>1</sub> = 0.0411, wR <sub>2</sub> = 0.1029                                                             |
| <b>Largest diff. peak/hole [e/Å<sup>3</sup>]</b> | 0.30/-0.34                                                                                   | 0.60/-0.75                                                                                   | 0.52/-0.52                                                                                   | 0.74/-0.69                                                                                                      | 0.52/-0.38                                                                                                    |
| <b>CCDC Number</b>                               | 2406454                                                                                      | 2406467                                                                                      | 2406457                                                                                      | 2406468                                                                                                         | 2406456                                                                                                       |

| Compound                                         | 12[OTf] <sub>2</sub>                                                                         | 16                                                               | 18a[OTf] <sub>2</sub> ·2 MeCN                                                                                | 19[OTf] <sub>2</sub>                                                                         | 20[OTf] <sub>2</sub> ·2 C <sub>2</sub> H <sub>4</sub> Cl <sub>2</sub>                                                      |
|--------------------------------------------------|----------------------------------------------------------------------------------------------|------------------------------------------------------------------|--------------------------------------------------------------------------------------------------------------|----------------------------------------------------------------------------------------------|----------------------------------------------------------------------------------------------------------------------------|
| <b>Empirical formula</b>                         | C <sub>25</sub> H <sub>29</sub> F <sub>6</sub> N <sub>4</sub> O <sub>7</sub> PS <sub>2</sub> | C <sub>12</sub> H <sub>9</sub> N <sub>3</sub> P                  | C <sub>32</sub> H <sub>36</sub> Cl <sub>2</sub> F <sub>6</sub> N <sub>3</sub> O <sub>7</sub> PS <sub>2</sub> | C <sub>31</sub> H <sub>34</sub> F <sub>6</sub> N <sub>3</sub> O <sub>6</sub> PS <sub>3</sub> | C <sub>44</sub> H <sub>53</sub> Cl <sub>4</sub> F <sub>6</sub> N <sub>3</sub> O <sub>6</sub> P <sub>2</sub> S <sub>2</sub> |
| <b>Formula weight [g/mol]</b>                    | 706.61                                                                                       | 212.18                                                           | 854.63                                                                                                       | 785.76                                                                                       | 1101.75                                                                                                                    |
| <b>Temperature [K]</b>                           | 100.00(10)                                                                                   | 104.94(16)                                                       | 100.00(10)                                                                                                   | 100.00(10)                                                                                   | 99.98(10)                                                                                                                  |
| <b>Crystal system</b>                            | orthorhombic                                                                                 | monoclinic                                                       | triclinic                                                                                                    | monoclinic                                                                                   | monoclinic                                                                                                                 |
| <b>Space group</b>                               | Pbca                                                                                         | P2 <sub>1</sub>                                                  | P-1                                                                                                          | P2 <sub>1</sub> /c                                                                           | P2 <sub>1</sub> /n                                                                                                         |
| <b>a [Å]</b>                                     | 14.45510(10)                                                                                 | 6.64810(10)                                                      | 8.85260(10)                                                                                                  | 18.75880(9)                                                                                  | 10.68480(10)                                                                                                               |
| <b>b [Å]</b>                                     | 15.32030(10)                                                                                 | 7.88450(10)                                                      | 10.52490(10)                                                                                                 | 11.36633(5)                                                                                  | 41.6981(4)                                                                                                                 |
| <b>c [Å]</b>                                     | 27.6597(2)                                                                                   | 9.99350(10)                                                      | 19.7674(2)                                                                                                   | 16.43311(7)                                                                                  | 11.29480(10)                                                                                                               |
| <b>a [°]</b>                                     | 90                                                                                           | 90                                                               | 93.5370(10)                                                                                                  | 90                                                                                           | 90                                                                                                                         |
| <b>β [°]</b>                                     | 90                                                                                           | 104.510(2)                                                       | 97.1010(10)                                                                                                  | 97.0303(4)                                                                                   | 90.2940(10)                                                                                                                |
| <b>γ [°]</b>                                     | 90                                                                                           | 90                                                               | 92.4710(10)                                                                                                  | 90                                                                                           | 90                                                                                                                         |
| <b>Volume [Å<sup>3</sup>]</b>                    | 6125.42(7)                                                                                   | 507.121(12)                                                      | 1821.78(3)                                                                                                   | 3477.50(3)                                                                                   | 5032.17(8)                                                                                                                 |
| <b>Z</b>                                         | 8                                                                                            | 2                                                                | 2                                                                                                            | 4                                                                                            | 4                                                                                                                          |
| <b>ρ<sub>calc</sub> [g/cm<sup>3</sup>]</b>       | 1.532                                                                                        | 1.390                                                            | 1.558                                                                                                        | 1.501                                                                                        | 1.454                                                                                                                      |
| <b>μ [mm<sup>-1</sup>]</b>                       | 2.859                                                                                        | 2.094                                                            | 3.824                                                                                                        | 3.098                                                                                        | 4.132                                                                                                                      |
| <b>F(000)</b>                                    | 2912.0                                                                                       | 220.0                                                            | 880.0                                                                                                        | 1624.0                                                                                       | 2280.0                                                                                                                     |
| <b>Crystal size [mm<sup>3</sup>]</b>             | 0.08 × 0.06 × 0.03                                                                           | 0.21 × 0.13 × 0.09                                               | 0.236 × 0.183 × 0.113                                                                                        | 0.14 × 0.12 × 0.04                                                                           | 0.167 × 0.157 × 0.073                                                                                                      |
| <b>Radiation (λ in Å)</b>                        | Cu Kα (λ = 1.54184)                                                                          | Cu Kα (λ = 1.54184)                                              | Cu Kα (λ = 1.54184)                                                                                          | Cu Kα (λ = 1.54184)                                                                          | CuKα (λ = 1.54184)                                                                                                         |
| <b>2θ range for data collection [°]</b>          | 6.392 to 153.788                                                                             | 9.14 to 153.29                                                   | 4.516 to 153.62                                                                                              | 4.746 to 153.416                                                                             | 4.238 to 144.258                                                                                                           |
| <b>Index ranges</b>                              | -18 ≤ h ≤ 17, -19 ≤ k ≤ 18,<br>-21 ≤ l ≤ 34                                                  | -8 ≤ h ≤ 8, -9 ≤ k ≤ 8, -11 ≤<br>l ≤ 12                          | -11 ≤ h ≤ 10, -13 ≤ k ≤ 12,<br>-24 ≤ l ≤ 24                                                                  | -23 ≤ h ≤ 23, -14 ≤ k ≤ 14,<br>-17 ≤ l ≤ 20                                                  | -13 ≤ h ≤ 13, -51 ≤ k ≤ 51,<br>-13 ≤ l ≤ 12                                                                                |
| <b>Reflections collected</b>                     | 73709                                                                                        | 4624                                                             | 20485                                                                                                        | 41338                                                                                        | 55532                                                                                                                      |
| <b>Independent reflections</b>                   | 6454 [R <sub>int</sub> = 0.0492,<br>R <sub>sigma</sub> = 0.0222]                             | 1885 [R <sub>int</sub> = 0.0175,<br>R <sub>sigma</sub> = 0.0201] | 7547 [R <sub>int</sub> = 0.0216,<br>R <sub>sigma</sub> = 0.0214]                                             | 7284 [R <sub>int</sub> = 0.0302,<br>R <sub>sigma</sub> = 0.0217]                             | 9911 [R <sub>int</sub> = 0.0328,<br>R <sub>sigma</sub> = 0.0220]                                                           |
| <b>Data/restraints/parameters</b>                | 6454/0/412                                                                                   | 1885/1/136                                                       | 7547/0/484                                                                                                   | 7284/192/494                                                                                 | 9911/120/660                                                                                                               |
| <b>Goodness-of-fit on F<sup>2</sup></b>          | 1.033                                                                                        | 1.073                                                            | 1.038                                                                                                        | 1.046                                                                                        | 1.049                                                                                                                      |
| <b>Final R indexes (I ≥ 2σ (I))</b>              | R <sub>1</sub> = 0.0303, wR <sub>2</sub> = 0.0756                                            | R <sub>1</sub> = 0.0236, wR <sub>2</sub> = 0.0631                | R <sub>1</sub> = 0.0348, wR <sub>2</sub> = 0.0894                                                            | R <sub>1</sub> = 0.0273, wR <sub>2</sub> = 0.0680                                            | R <sub>1</sub> = 0.0382, wR <sub>2</sub> = 0.1005                                                                          |
| <b>Final R indexes (all data)</b>                | R <sub>1</sub> = 0.0361, wR <sub>2</sub> = 0.0791                                            | R <sub>1</sub> = 0.0241, wR <sub>2</sub> = 0.0635                | R <sub>1</sub> = 0.0353, wR <sub>2</sub> = 0.0898                                                            | R <sub>1</sub> = 0.0298, wR <sub>2</sub> = 0.0697                                            | R <sub>1</sub> = 0.0413, wR <sub>2</sub> = 0.1032                                                                          |
| <b>Largest diff. peak/hole [e/Å<sup>3</sup>]</b> | 0.34/-0.36                                                                                   | 0.16/-0.17                                                       | 0.51/-0.56                                                                                                   | 0.32/-0.39                                                                                   | 1.31/-0.59                                                                                                                 |
| <b>Flack parameter</b>                           | -                                                                                            | -0.009(10)                                                       | -                                                                                                            | -                                                                                            | -                                                                                                                          |
| <b>CCDC Number</b>                               | 2406459                                                                                      | 2406453                                                          | 2406455                                                                                                      | 2406460                                                                                      | 2406458                                                                                                                    |

| Compound                                         | 24[OTf]·CH <sub>2</sub> Cl <sub>2</sub>                                                                      | 26a[OTf] <sub>2</sub> ·CH <sub>2</sub> Cl <sub>2</sub>                                                       | 26b[OTf] <sub>2</sub>                                                                        | 26c[OTf] <sub>2</sub> ·MeCN                                                                    | 26e[OTf] <sub>2</sub> ·MeCN                                                                  |
|--------------------------------------------------|--------------------------------------------------------------------------------------------------------------|--------------------------------------------------------------------------------------------------------------|----------------------------------------------------------------------------------------------|------------------------------------------------------------------------------------------------|----------------------------------------------------------------------------------------------|
| <b>Empirical formula</b>                         | C <sub>19</sub> H <sub>29</sub> Cl <sub>2</sub> F <sub>6</sub> N <sub>4</sub> O <sub>6</sub> PS <sub>2</sub> | C <sub>21</sub> H <sub>32</sub> Cl <sub>2</sub> F <sub>6</sub> N <sub>5</sub> O <sub>6</sub> PS <sub>2</sub> | C <sub>21</sub> H <sub>32</sub> F <sub>6</sub> N <sub>5</sub> O <sub>6</sub> PS <sub>2</sub> | C <sub>27</sub> H <sub>34</sub> BrF <sub>6</sub> N <sub>6</sub> O <sub>6</sub> PS <sub>2</sub> | C <sub>29</sub> H <sub>40</sub> F <sub>6</sub> N <sub>7</sub> O <sub>6</sub> PS <sub>2</sub> |
| <b>Formula weight [g/mol]</b>                    | 689.45                                                                                                       | 730.50                                                                                                       | 659.60                                                                                       | 827.60                                                                                         | 791.77                                                                                       |
| <b>Temperature [K]</b>                           | 100.0(3)                                                                                                     | 100.0(2)                                                                                                     | 100.0(2)                                                                                     | 100.01(10)                                                                                     | 100.01(10)                                                                                   |
| <b>Crystal system</b>                            | monoclinic                                                                                                   | monoclinic                                                                                                   | monoclinic                                                                                   | triclinic                                                                                      | monoclinic                                                                                   |
| <b>Space group</b>                               | P2 <sub>1</sub> /n                                                                                           | P2 <sub>1</sub> /c                                                                                           | P2 <sub>1</sub> /c                                                                           | P-1                                                                                            | P2 <sub>1</sub> /n                                                                           |
| <b>a [Å]</b>                                     | 12.6759(2)                                                                                                   | 15.45123(18)                                                                                                 | 14.15063(9)                                                                                  | 11.23858(13)                                                                                   | 16.0067(3)                                                                                   |
| <b>b [Å]</b>                                     | 14.42555(18)                                                                                                 | 16.9704(2)                                                                                                   | 17.01045(11)                                                                                 | 12.5586(2)                                                                                     | 9.56675(19)                                                                                  |
| <b>c [Å]</b>                                     | 16.7660(2)                                                                                                   | 12.17720(15)                                                                                                 | 12.22371(7)                                                                                  | 13.81121(16)                                                                                   | 24.2375(6)                                                                                   |
| <b>α [°]</b>                                     | 90                                                                                                           | 90                                                                                                           | 90                                                                                           | 103.8546(12)                                                                                   | 90                                                                                           |
| <b>β [°]</b>                                     | 106.2654(15)                                                                                                 | 102.4422(12)                                                                                                 | 97.3287(5)                                                                                   | 98.6579(10)                                                                                    | 95.874(2)                                                                                    |
| <b>γ [°]</b>                                     | 90                                                                                                           | 90                                                                                                           | 90                                                                                           | 103.2718(12)                                                                                   | 90                                                                                           |
| <b>Volume [Å<sup>3</sup>]</b>                    | 2943.08(7)                                                                                                   | 3118.03(7)                                                                                                   | 2918.31(3)                                                                                   | 1797.97(4)                                                                                     | 3692.04(14)                                                                                  |
| <b>Z</b>                                         | 4                                                                                                            | 4                                                                                                            | 4                                                                                            | 2                                                                                              | 4                                                                                            |
| <b>ρ<sub>calc</sub> [g/cm<sup>3</sup>]</b>       | 1.556                                                                                                        | 1.556                                                                                                        | 1.501                                                                                        | 1.529                                                                                          | 1.424                                                                                        |
| <b>μ [mm<sup>-1</sup>]</b>                       | 4.557                                                                                                        | 4.347                                                                                                        | 2.934                                                                                        | 3.773                                                                                          | 2.435                                                                                        |
| <b>F(000)</b>                                    | 1416.0                                                                                                       | 1504.0                                                                                                       | 1368.0                                                                                       | 844.0                                                                                          | 1648.0                                                                                       |
| <b>Crystal size [mm<sup>3</sup>]</b>             | 0.354 × 0.253 × 0.159                                                                                        | 0.242 × 0.148 × 0.032                                                                                        | 0.25 × 0.147 × 0.137                                                                         | 0.373 × 0.203 × 0.065                                                                          | 0.368 × 0.037 × 0.027                                                                        |
| <b>Radiation (λ in Å)</b>                        | CuKα (λ = 1.54184)                                                                                           | CuKα (λ = 1.54184)                                                                                           | CuKα (λ = 1.54184)                                                                           | CuKα (λ = 1.54184)                                                                             | CuKα (λ = 1.54184)                                                                           |
| <b>2θ range for data collection [°]</b>          | 7.784 to 152.77                                                                                              | 5.858 to 153.806                                                                                             | 6.298 to 153.098                                                                             | 6.754 to 153.24                                                                                | 6.332 to 153.168                                                                             |
| <b>Index ranges</b>                              | -15 ≤ h ≤ 15, -18 ≤ k ≤ 13, -21 ≤ l ≤ 20                                                                     | -19 ≤ h ≤ 19, -21 ≤ k ≤ 21, -15 ≤ l ≤ 10                                                                     | -17 ≤ h ≤ 17, -21 ≤ k ≤ 16, -15 ≤ l ≤ 10                                                     | -13 ≤ h ≤ 14, -15 ≤ k ≤ 15, -17 ≤ l ≤ 12                                                       | -19 ≤ h ≤ 17, -12 ≤ k ≤ 9, -29 ≤ l ≤ 30                                                      |
| <b>Reflections collected</b>                     | 21315                                                                                                        | 37436                                                                                                        | 16449                                                                                        | 17302                                                                                          | 20334                                                                                        |
| <b>Independent reflections</b>                   | 6082 [R <sub>int</sub> = 0.0247, R <sub>sigma</sub> = 0.0208]                                                | 6513 [R <sub>int</sub> = 0.0327, R <sub>sigma</sub> = 0.0165]                                                | 6076 [R <sub>int</sub> = 0.0170, R <sub>sigma</sub> = 0.0185]                                | 7459 [R <sub>int</sub> = 0.0305, R <sub>sigma</sub> = 0.0347]                                  | 7664 [R <sub>int</sub> = 0.0364, R <sub>sigma</sub> = 0.0396]                                |
| <b>Data/restraints/parameters</b>                | 6082/0/499                                                                                                   | 6513/0/443                                                                                                   | 6076/0/401                                                                                   | 7459/0/506                                                                                     | 7664/0/471                                                                                   |
| <b>Goodness-of-fit on F<sup>2</sup></b>          | 1.059                                                                                                        | 1.063                                                                                                        | 1.047                                                                                        | 1.034                                                                                          | 1.071                                                                                        |
| <b>Final R indexes (I &gt;= 2σ (I))</b>          | R <sub>1</sub> = 0.0335, wR <sub>2</sub> = 0.0878                                                            | R <sub>1</sub> = 0.0348, wR <sub>2</sub> = 0.0979                                                            | R <sub>1</sub> = 0.0281, wR <sub>2</sub> = 0.0684                                            | R <sub>1</sub> = 0.0360, wR <sub>2</sub> = 0.0951                                              | R <sub>1</sub> = 0.0471, wR <sub>2</sub> = 0.1193                                            |
| <b>Final R indexes (all data)</b>                | R <sub>1</sub> = 0.0347, wR <sub>2</sub> = 0.0887                                                            | R <sub>1</sub> = 0.0357, wR <sub>2</sub> = 0.0987                                                            | R <sub>1</sub> = 0.0292, wR <sub>2</sub> = 0.0692                                            | R <sub>1</sub> = 0.0372, wR <sub>2</sub> = 0.0964                                              | R <sub>1</sub> = 0.0561, wR <sub>2</sub> = 0.1254                                            |
| <b>Largest diff. peak/hole [e/Å<sup>3</sup>]</b> | 0.37/-0.46                                                                                                   | 0.35/-0.50                                                                                                   | 0.27/-0.37                                                                                   | 0.87/-0.86                                                                                     | 0.59/-0.49                                                                                   |
| <b>CCDC Number</b>                               | 2406464                                                                                                      | 2406462                                                                                                      | 2406469                                                                                      | 2406465                                                                                        | 2406470                                                                                      |

| Compound                                         | 26f[OTf] <sub>4</sub>                                                                                         | 27[OTf] <sub>2</sub> ·2 CH <sub>2</sub> Cl <sub>2</sub>                                                        | 28[OTf] <sub>2</sub>                                                                         |
|--------------------------------------------------|---------------------------------------------------------------------------------------------------------------|----------------------------------------------------------------------------------------------------------------|----------------------------------------------------------------------------------------------|
| <b>Empirical formula</b>                         | C <sub>46</sub> H <sub>62</sub> F <sub>12</sub> N <sub>10</sub> O <sub>12</sub> P <sub>2</sub> S <sub>4</sub> | C <sub>27</sub> H <sub>35</sub> BrCl <sub>4</sub> F <sub>6</sub> N <sub>5</sub> O <sub>7</sub> PS <sub>2</sub> | C <sub>29</sub> H <sub>34</sub> F <sub>6</sub> N <sub>5</sub> O <sub>6</sub> PS <sub>3</sub> |
| <b>Formula weight [g/mol]</b>                    | 1365.23                                                                                                       | 972.40                                                                                                         | 789.76                                                                                       |
| <b>Temperature [K]</b>                           | 100.01(10)                                                                                                    | 100.01(10)                                                                                                     | 100.01(10)                                                                                   |
| <b>Crystal system</b>                            | monoclinic                                                                                                    | triclinic                                                                                                      | monoclinic                                                                                   |
| <b>Space group</b>                               | P2 <sub>1</sub> /c                                                                                            | P-1                                                                                                            | P2 <sub>1</sub>                                                                              |
| <b>a [Å]</b>                                     | 16.3693(9)                                                                                                    | 9.8199(3)                                                                                                      | 12.16963(7)                                                                                  |
| <b>b [Å]</b>                                     | 13.6681(4)                                                                                                    | 11.6251(3)                                                                                                     | 21.08792(14)                                                                                 |
| <b>c [Å]</b>                                     | 15.2188(7)                                                                                                    | 18.7271(5)                                                                                                     | 13.73006(9)                                                                                  |
| <b>α [°]</b>                                     | 90                                                                                                            | 91.327(2)                                                                                                      | 90                                                                                           |
| <b>β [°]</b>                                     | 116.992(7)                                                                                                    | 98.488(2)                                                                                                      | 90.8006(5)                                                                                   |
| <b>γ [°]</b>                                     | 90                                                                                                            | 106.588(2)                                                                                                     | 90                                                                                           |
| <b>Volume [Å<sup>3</sup>]</b>                    | 3034.1(3)                                                                                                     | 2021.62(10)                                                                                                    | 3523.23(4)                                                                                   |
| <b>Z</b>                                         | 2                                                                                                             | 2                                                                                                              | 4                                                                                            |
| <b>ρ<sub>calc</sub> [g/cm<sup>3</sup>]</b>       | 1.494                                                                                                         | 1.597                                                                                                          | 1.489                                                                                        |
| <b>μ [mm<sup>-1</sup>]</b>                       | 2.846                                                                                                         | 5.838                                                                                                          | 3.076                                                                                        |
| <b>F(000)</b>                                    | 1412.0                                                                                                        | 984.0                                                                                                          | 1632.0                                                                                       |
| <b>Crystal size [mm<sup>3</sup>]</b>             | 0.26 × 0.122 × 0.02                                                                                           | 0.421 × 0.06 × 0.045                                                                                           | 0.146 × 0.049 × 0.046                                                                        |
| <b>Radiation (λ in Å)</b>                        | Cu Kα (λ = 1.54184)                                                                                           | CuKα (λ = 1.54184)                                                                                             | CuKα (λ = 1.54184)                                                                           |
| <b>2θ range for data collection [°]</b>          | 8.866 to 136.492                                                                                              | 4.782 to 153.91                                                                                                | 6.438 to 153.456                                                                             |
| <b>Index ranges</b>                              | -19 ≤ h ≤ 19, -16 ≤ k ≤ 15,<br>-17 ≤ l ≤ 18                                                                   | -12 ≤ h ≤ 10, -13 ≤ k ≤ 14,<br>-23 ≤ l ≤ 23                                                                    | -12 ≤ h ≤ 15, -25 ≤ k ≤ 26,<br>-15 ≤ l ≤ 17                                                  |
| <b>Reflections collected</b>                     | 15387                                                                                                         | 22076                                                                                                          | 38763                                                                                        |
| <b>Independent reflections</b>                   | 5479 [R <sub>int</sub> = 0.0582,<br>R <sub>sigma</sub> = 0.0642]                                              | 8432 [R <sub>int</sub> = 0.0413,<br>R <sub>sigma</sub> = 0.0392]                                               | 14269 [R <sub>int</sub> = 0.0266,<br>R <sub>sigma</sub> = 0.0312]                            |
| <b>Data/restraints/parameters</b>                | 5479/10/427                                                                                                   | 8432/272/632                                                                                                   | 14269/1/917                                                                                  |
| <b>Goodness-of-fit on F<sup>2</sup></b>          | 1.041                                                                                                         | 1.034                                                                                                          | 1.040                                                                                        |
| <b>Final R indexes (I&gt;=2σ (I))</b>            | R <sub>1</sub> = 0.0815, wR <sub>2</sub> = 0.2288                                                             | R <sub>1</sub> = 0.0561, wR <sub>2</sub> = 0.1540                                                              | R <sub>1</sub> = 0.0302, wR <sub>2</sub> = 0.0776                                            |
| <b>Final R indexes (all data)</b>                | R <sub>1</sub> = 0.1056, wR <sub>2</sub> = 0.2513                                                             | R <sub>1</sub> = 0.0598, wR <sub>2</sub> = 0.1586                                                              | R <sub>1</sub> = 0.0311, wR <sub>2</sub> = 0.0784                                            |
| <b>Largest diff. peak/hole [e/Å<sup>3</sup>]</b> | 0.74/-0.62                                                                                                    | 1.07/-1.09                                                                                                     | 0.29/-0.34                                                                                   |
| <b>Flack parameter</b>                           | -                                                                                                             | -                                                                                                              | -0.008(8)                                                                                    |
| <b>CCDC Number</b>                               | 2406466                                                                                                       | 2406463                                                                                                        | 2406461                                                                                      |

## 6. References

- 1 J. Fidelius, K. Schwedtmann, S. Schellhammer, J. Haberstroh, S. Schulz, R. Huang, M. C. Klotzsche, A. Bauzá, A. Frontera, S. Reineke and J. J. Weigand, *Chem*, 2024, **10**, 644.
- 2 J. J. Weigand, K.-O. Feldmann and F. D. Henne, *J. Am. Chem. Soc.*, 2010, **132**, 16321.
- 3 C. Taube, K. Schwedtmann, M. Noikham, E. Somsook, F. Hennersdorf, R. Wolf and J. J. Weigand, *Angew. Chem. Int. Ed.*, 2020, **59**, 3585.
- 4 J. C. de Mello, H. F. Wittmann and R. H. Friend, *Adv. Mater.*, 1997, **9**, 230.
- 5 F. Fries and S. Reineke, *Sci. Rep.*, 2019, **9**, 15638.
- 6 R. Ahlrichs, M. Bär, M. Häser, H. Horn and C. Kölmel, *Chem. Phys. Lett.*, 1989, **162**, 165.
- 7 M. Ernzerhof and G. E. Scuseria, *J. Chem. Phys.*, 1999, **110**, 5029.
- 8 F. Weigend, *Phys. Chem. Chem. Phys.*, 2006, **8**, 1057.
- 9 S. Grimme, J. Antony, S. Ehrlich and H. Krieg, *J. Chem. Phys.*, 2010, **132**, 154104.
- 10 A. Klamt, *WIREs Comput. Mol. Sci.*, 2011, **1**, 699.
- 11 M. J. Frisch, G. W. Trucks, H. B. Schlegel, G. E. Scuseria, M. A. Robb, J. R. Cheeseman, G. Scalmani, V. Barone, G. A. Petersson, H. Nakatsuji, X. Li, M. Caricato, A. V. Marenich, J. Bloino, B. G. Janesko, R. Gomperts, B. Mennucci, H. P. Hratchian, J. V. Ortiz, A. F. Izmaylov, J. L. Sonnenberg, D. Williams-Young, F. Ding, F. Lipparini, F. Egidi, J. Goings, B. Peng, A. Petrone, T. Henderson, D. Ranasinghe, V. G. Zakrzewski, J. Gao, N. Rega, G. Zheng, W. Liang, M. Hada, M. Ehara, K. Toyota, R. Fukuda, J. Hasegawa, M. Ishida, T. Nakajima, Y. Honda, O. Kitao, H. Nakai, T. Vreven, K. Throssell, J. A. Montgomery, Jr., J. E. Peralta, F. Ogliaro, M. J. Bearpark, J. J. Heyd, E. N. Brothers, K. N. Kudin, V. N. Staroverov, T. A. Keith, R. Kobayashi, J. Normand, K. Raghavachari, A. P. Rendell, J. C. Burant, S. S. Iyengar, J. Tomasi, M. Cossi, J. M. Millam, M. Klene, C. Adamo, R. Cammi, J. W. Ochterski, R. L. Martin, K. Morokuma, O. Farkas, J. B. Foresman, and D. J. Fox, Gaussian 16, Rev. C.01, Gaussian Inc., Wallingford CT, 2016.
- 12 T. Yanai, D. P. Tew and N. C. Handy, *Chem. Phys. Lett.*, 2004, **393**, 51.
- 13 a) A. D. McLean and G. S. Chandler, *J. Chem. Phys.*, 1980, **72**, 5639; b) R. Krishnan, J. S. Binkley, R. Seeger and J. A. Pople, *J. Chem. Phys.*, 1980, **72**, 650;
- 14 R. Matsidik, H. Komber, M. Brinkmann, K. S. Schellhammer, F. Ortmann and M. Sommer, *J. Am. Chem. Soc.*, 2023.
- 15 R. Báez-Grez, L. Ruiz, R. Pino-Rios and W. Tiznado, *RSC advances*, 2018, **8**, 13446.
- 16 a) R. Herges and D. Geuenich, *J. Phys. Chem. A*, 2001, **105**, 3214; b) D. Geuenich, K. Hess, F. Köhler and R. Herges, *Chem. Rev.*, 2005, **105**, 3758;
- 17 Oxford Diffraction / Agilent Technologies UK Ltd, CrysAlisPRO.
- 18 O. V. Dolomanov, L. J. Bourhis, R. J. Gildea, J. A. K. Howard and H. Puschmann, *J Appl Crystallogr*, 2009, **42**, 339.
- 19 G. M. Sheldrick, *Acta crystallographica. Section A, Foundations and advances*, 2015, **71**, 3.
- 20 G. M. Sheldrick, *Acta crystallographica. Section C, Structural chemistry*, 2015, **71**, 3.
